# Supplementary material for: Manganese-promoted reductive cross-coupling of disulfides with dialkyl carbonates
Source: Royal Society of Chemistry journal article supplement (doi:10.1039/d3cc04862d), 2023-01-01

# ***Supporting Information***

## **Manganese-promoted reductive cross-coupling of disulfides with dialkyl carbonates**

Chao-Peng Zhang, Tian-Zhang Wang and Yu-Feng Liang\*

School of Chemistry and Chemical Engineering, Shandong University, Jinan 250100, China

Email: yfliang@sdu.edu.cn

### **Table of Contents**

|                                       |            |
|---------------------------------------|------------|
| <b>1. General remarks .....</b>       | <b>S2</b>  |
| <b>2. General procedure .....</b>     | <b>S2</b>  |
| <b>3. Characterization data .....</b> | <b>S3</b>  |
| <b>4. References .....</b>            | <b>S19</b> |
| <b>5. NMR Spectra .....</b>           | <b>S21</b> |
| <b>6. MS Spectra .....</b>            | <b>S68</b> |

## 1. General remarks

$^1\text{H}$  NMR,  $^{13}\text{C}$  NMR data were obtained on AVANCE III Bruker 500 MHz nuclear resonance spectrometers unless otherwise noted. Chemical shifts (in ppm) were referenced to tetramethylsilane (TMS) ( $\delta = 0.00$  ppm) in  $\text{CDCl}_3$  or dimethyl sulfoxide ( $\delta = 2.50$  ppm) in  $\text{DMSO}-d_6$  as an internal standard. The data of  $^1\text{H}$  NMR was reported as follows: chemical shift, multiplicity (s = singlet, d = doublet, t = triplet, m = multiplet and br = broad), coupling constant ( $J$  values) in Hz and integration.  $^{13}\text{C}$  NMR spectra were obtained by the same NMR spectrometers and were calibrated with  $\text{CDCl}_3$  ( $\delta = 77.0$  ppm) or  $\text{DMSO}-d_6$  ( $\delta = 39.50$  ppm). Flash chromatography was performed using 300-400 mesh silica gel with the indicated eluent according to standard techniques. Carbonate ester was purchased from Energy Chemical or prepared following our previously published procedures.<sup>1</sup> Analytical thin-layer chromatography (TLC) was performed on pre-coated, glass-backed silica gel plates. Analysis of crude reaction mixture was done on an Agilent 7890 GC System with an Agilent 5975 Mass Selective Detector. Visualization of the developed chromatogram was performed by UV absorbance (254 nm) unless otherwise noted. High-resolution mass spectral (HRMS) data were recorded on Bruker APEX IV Fourier transform ion cyclotron resonance mass spectrometer using electrospray ionization (ESI) mode.

## 2. General procedure

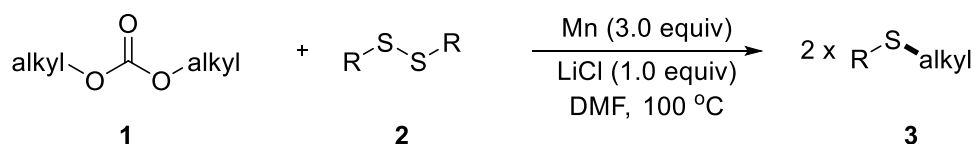

To a 10 mL Schlenk tube was added sequentially disulfide **2** (0.2 mmol), Mn power (32.9 mg, 0.6 mmol) and LiCl (8.8 mg, 0.2 mmol). After the Schlenk tube was filled with nitrogen, carbonate ester **1** (0.4 mmol) and DMF (0.5 mL) were added via syringe. The resulting mixture was stirred at 100 °C for 12 h under  $\text{N}_2$ . After the reaction was completed,  $\text{H}_2\text{O}$  (5 mL) was added into the reaction mixture and extracted with ethyl acetate (5 mL x 3). The organic layer was dried, filtered, and concentrated. The residue was purified by column chromatography to afford product **3**.

### 3. Characterization data

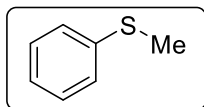

**Methyl(phenyl)sulfane (3aa).**<sup>2</sup> The representative procedure was followed using 1,2-diphenyldisulfane (**1a**) (43.7 mg, 0.2 mmol) and DMC (**2a**) (36.0 mg, 0.4 mmol). Isolation by column chromatography (*n*-hexane) yielded **3aa** (44.1 mg, 91%) as a colorless oil. <sup>1</sup>H NMR (500 MHz, CDCl<sub>3</sub>)  $\delta$  7.27 – 7.23 (m, 4H), 7.12 – 7.09 (m, 1H), 2.44 (s, 3H); <sup>13</sup>C NMR (125 MHz, CDCl<sub>3</sub>)  $\delta$  138.8, 128.7, 126.6, 124.9, 15.7.

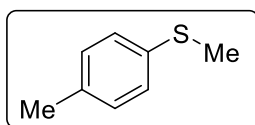

**Methyl(*p*-tolyl)sulfane (3ba).**<sup>2</sup> The representative procedure was followed using 1,2-di-*p*-tolylldisulfane (**1b**) (49.3 mg, 0.2 mmol) and DMC (**2a**) (36.0 mg, 0.4 mmol). Isolation by column chromatography (*n*-hexane) yielded **3ba** (49.7 mg, 90%) as a yellow liquid. <sup>1</sup>H NMR (500 MHz, CDCl<sub>3</sub>)  $\delta$  7.17 (d, *J* = 8.0 Hz, 2H), 7.08 (d, *J* = 8.0 Hz, 2H), 2.44 (s, 3H), 2.30 (s, 3H); <sup>13</sup>C NMR (125 MHz, CDCl<sub>3</sub>)  $\delta$  135.0, 134.7, 129.5, 127.3, 20.9, 16.8.

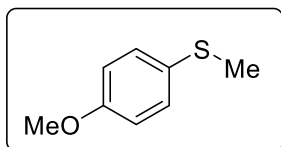

**(4-Methoxyphenyl)(methyl)sulfane (3ca).**<sup>3</sup> The representative procedure was followed using 1,2-bis(4-methoxyphenyl)disulfane (**1c**) (55.7 mg, 0.2 mmol) and DMC (**2a**) (36.0 mg, 0.4 mmol). Isolation by column chromatography (petroleum ether : ethyl acetate = 20 : 1) yielded **3ca** (48.1 mg, 78%) as a colorless oil. <sup>1</sup>H NMR (500 MHz, CDCl<sub>3</sub>)  $\delta$  7.20 (d, *J* = 10.0 Hz, 2H), 6.78 (d, *J* = 10.0 Hz, 2H), 3.72 (s, 3H), 2.37 (s, 3H); <sup>13</sup>C NMR (125 MHz, CDCl<sub>3</sub>)  $\delta$  158.2, 130.2, 128.7, 114.6, 55.3, 18.2.

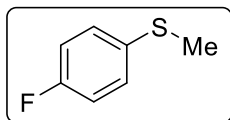

**(4-Fluorophenyl)(methyl)sulfane (3da).**<sup>2</sup> The representative procedure was followed using 1,2-bis(4-fluorophenyl)disulfane (**1d**) (50.9 mg, 0.2 mmol) and DMC (**2a**) (36.0 mg, 0.4 mmol). Isolation by column chromatography (*n*-hexane) yielded **3da** (38.6 mg, 68%) as a colorless oil. <sup>1</sup>H NMR (500 MHz, CDCl<sub>3</sub>)  $\delta$  7.17 – 7.15 (m, 2H), 6.92 – 6.89 (m, 2H), 2.37 (s, 3H); <sup>13</sup>C NMR (125 MHz, CDCl<sub>3</sub>)  $\delta$  162.1 (d, *J* = 243.7 Hz), 133.2 (d, *J* = 3.8 Hz), 129.2 (d, *J* = 7.5 Hz), 115.8 (d, *J* = 22.5 Hz), 17.1; <sup>19</sup>F NMR (471 MHz, CDCl<sub>3</sub>)  $\delta$  -117.3.

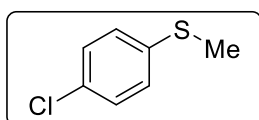

**(4-Chlorophenyl)(methyl)sulfane (3ea).**<sup>2</sup> The representative procedure was followed using 1,2-bis(4-chlorophenyl)disulfane (**1e**) (57.4 mg, 0.2 mmol) and DMC (**2a**) (36.0 mg, 0.4 mmol). Isolation by column chromatography (*n*-hexane) yielded **3ea** (42.3 mg, 67%) as a colorless oil. <sup>1</sup>H NMR (500 MHz, CDCl<sub>3</sub>)  $\delta$  7.25 (d, *J* = 10.0 Hz, 2H), 7.18 (d, *J* = 10.0 Hz, 2H), 2.47 (s, 3H); <sup>13</sup>C NMR (125 MHz, CDCl<sub>3</sub>)  $\delta$  132.7, 130.9, 128.9, 127.9, 16.1.

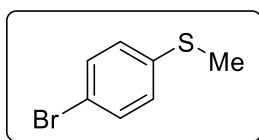

**(4-Bromophenyl)(methyl)sulfane (3fa).**<sup>4</sup> The representative procedure was followed using 1,2-bis(4-bromophenyl)disulfane (**1f**) (74.8 mg, 0.2 mmol) and DMC (**2a**) (36.0 mg, 0.4 mmol). Isolation by column chromatography (*n*-hexane) yielded **3fa** (57.0 mg, 71%) as a colorless oil. <sup>1</sup>H NMR (500 MHz, CDCl<sub>3</sub>)  $\delta$  7.38 (d, *J* = 4.2 Hz, 2H), 7.10 (d, *J* = 4.2 Hz, 2H), 2.44 (s, 3H); <sup>13</sup>C NMR (125 MHz, CDCl<sub>3</sub>)  $\delta$  137.7, 131.7, 128.1, 118.6, 15.9.

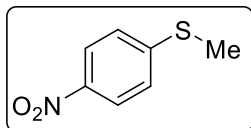

**Methyl(4-nitrophenyl)sulfane (3ga).**<sup>2</sup> The representative procedure was followed using 1,2-bis(4-nitrophenyl)disulfane (**1g**) (61.7 mg, 0.2 mmol) and DMC (**2a**) (36.0 mg, 0.4 mmol). Isolation by column chromatography (petroleum ether : ethyl acetate = 50 : 1) yielded **3ga** (50.1 mg, 74%) as a yellow solid. <sup>1</sup>H NMR (500 MHz, CDCl<sub>3</sub>)  $\delta$  8.06 (d,  $J$  = 10.0 Hz, 2H), 7.22 (d,  $J$  = 10.0 Hz, 2H), 2.48 (s, 3H); <sup>13</sup>C NMR (125 MHz, CDCl<sub>3</sub>)  $\delta$  148.8, 144.8, 125.0, 123.9, 14.9.

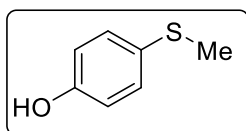

**4-(Methylthio)phenol (3ha).**<sup>5</sup> The representative procedure was followed using 4,4'-disulfanediyldiphenol (**1h**) (50.1 mg, 0.2 mmol) and DMC (**2a**) (36.0 mg, 0.4 mmol). Isolation by column chromatography (petroleum ether : ethyl acetate = 1 : 1) yielded **3ha** (40.3 mg, 71%) as a white solid. <sup>1</sup>H NMR (500 MHz, CDCl<sub>3</sub>)  $\delta$  7.22 (d,  $J$  = 10.0 Hz, 2H), 6.78 (d,  $J$  = 10.0 Hz, 2H), 2.44 (s, 3H); <sup>13</sup>C NMR (125 MHz, CDCl<sub>3</sub>)  $\delta$  154.1, 130.4, 128.8, 116.0, 18.0. Melting point: 85 °C.

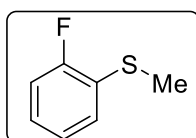

**(2-Fluorophenyl)(methyl)sulfane (3ia).**<sup>2</sup> The representative procedure was followed using 1,2-bis(2-fluorophenyl)disulfane (**1i**) (50.9 mg, 0.2 mmol) and DMC (**2a**) (36.0 mg, 0.4 mmol). Isolation by column chromatography (*n*-hexane) yielded **3ia** (40.3 mg, 71%) as a colorless oil. <sup>1</sup>H NMR (500 MHz, CDCl<sub>3</sub>)  $\delta$  7.22 – 6.18 (m, 1H), 7.10 – 7.06 (m, 1H), 7.06 – 7.01 (m, 1H), 7.04 – 7.02 (m, 1H), 2.39 (s, 3H); <sup>13</sup>C NMR (125 MHz, CDCl<sub>3</sub>)  $\delta$  161.4 (d,  $J$  = 242.5 Hz), 128.8 (d,  $J$  = 2.5 Hz), 127.3 (d,  $J$  = 7.5 Hz), 125.4 (d,  $J$  = 16.2 Hz), 124.4 (d,  $J$  = 3.8 Hz), 115.3 (d,  $J$  = 21.2 Hz), 15.6 (d,  $J$  = 2.5 Hz); <sup>19</sup>F NMR (471 MHz, CDCl<sub>3</sub>)  $\delta$  -111.31.

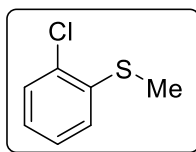

**(2-Chlorophenyl)(methyl)sulfane (3ja).**<sup>2</sup> The representative procedure was followed using 1,2-bis(2-chlorophenyl) disulfane (**1j**) (57.4 mg, 0.2 mmol) and DMC (**2a**) (36.0 mg, 0.4 mmol). Isolation by column chromatography (*n*-hexane) yielded **3ja** (55.0 mg, 87%) as a colorless oil. <sup>1</sup>H NMR (500 MHz, CDCl<sub>3</sub>)  $\delta$  7.28 – 7.26 (m, 1H), 7.19 – 7.15 (m, 1H), 7.10 – 7.08 (m, 1H), 7.02 – 6.99 (m, 1H), 2.40 (s, 3H); <sup>13</sup>C NMR (125 MHz, CDCl<sub>3</sub>)  $\delta$  142.1, 137.7, 131.8, 129.4, 127.2, 125.5, 15.2.

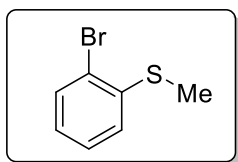

**(2-Bromophenyl)(methyl)sulfane (3ka).**<sup>4</sup> The representative procedure was followed using 1,2-bis(2-bromophenyl)disulfane (**1k**) (74.8 mg, 0.2 mmol) and DMC (**2a**) (36.0 mg, 0.4 mmol). Isolation by column chromatography (*n*-hexane) yielded **3ka** (49.3 mg, 61%) as a colorless oil. <sup>1</sup>H NMR (500 MHz, CDCl<sub>3</sub>)  $\delta$  7.42 (d, *J* = 8.0 Hz, 1H), 7.19 (t, *J* = 7.5 Hz, 1H), 7.03 (d, *J* = 8.0 Hz, 1H), 6.89 (t, *J* = 7.5 Hz, 1H), 2.56 (s, 3H); <sup>13</sup>C NMR (125 MHz, CDCl<sub>3</sub>)  $\delta$  139.7, 132.7, 127.8, 125.7, 125.5, 121.8, 15.8.

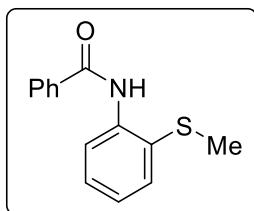

***N*-[2-(Methylthio)phenyl]benzamide (3la).**<sup>6</sup> The representative procedure was followed using *N,N'*-[disulfanediy]bis(2,1-phenylene)]dibenzamide (**1l**) (91.3 mg, 0.2 mmol) and DMC (**2a**) (36.0 mg, 0.4 mmol). Isolation by column chromatography (petroleum ether : ethyl acetate = 20 : 1) yielded **3la** (45.7 mg, 47%) as a colorless oil. <sup>1</sup>H NMR (500 MHz, CDCl<sub>3</sub>)  $\delta$  9.11 (br, 1H), 8.40 (d, *J* = 10.0 Hz, 2H), 7.84 (d, *J* =

5.0 Hz, 2H), 7.44 – 7.36 (m, 4 H), 7.24 – 7.20 (m, 1 H), 6.99 – 6.96 (m, 1 H), 2.26 (s, 3H); <sup>13</sup>C NMR (125 MHz, CDCl<sub>3</sub>) δ 162.9, 136.4, 132.7, 131.0, 129.8, 126.9, 126.7, 125.9, 123.5, 122.3, 118.4, 18.9. HRMS (ESI) m/z ([M+ H]<sup>+</sup>) Calcd. for C<sub>14</sub>H<sub>13</sub>NOS 244.0791, found: 244.0790.

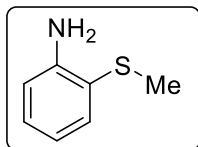

**2-(Methylthio)aniline (3ma).**<sup>7</sup> The representative procedure was followed using 2,2'-disulfanediyldianiline (**1m**) (49.7 mg, 0.2 mmol) and DMC (**2a**) (36.0 mg, 0.4 mmol). Isolation by column chromatography (petroleum ether : ethyl acetate = 10 : 1) yielded **3ma** (29.5 mg, 53%) as a colorless oil. <sup>1</sup>H NMR (500 MHz, CDCl<sub>3</sub>) δ 7.27 – 7.25 (m, 1H), 7.01 – 6.98 (m, 1H), 6.64 – 6.61 (m, 2H), 4.17 (br, 2H), 2.26 (s, 3H); <sup>13</sup>C NMR (125 MHz, CDCl<sub>3</sub>) δ 147.1, 133.4, 128.9, 120.3, 118.8, 114.9, 17.7. HRMS (ESI) m/z ([M+ H]<sup>+</sup>) Calcd. for C<sub>7</sub>H<sub>9</sub>NS 140.0529, found: 140.0528.

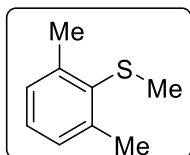

**(2,6-Dimethylphenyl)(methyl)sulfane (3na).**<sup>2</sup> The representative procedure was followed using 1,2-bis(2,6-dimethylphenyl)disulfane (**1n**) (54.9 mg, 0.2 mmol) and DMC (**2a**) (36.0 mg, 0.4 mmol). Isolation by column chromatography (*n*-hexane) yielded **3na** (38.3 mg, 63%) as a colorless oil. <sup>1</sup>H NMR (500 MHz, CDCl<sub>3</sub>) δ 7.09 (s, 2H), 2.55 (s, 6H), 2.22 (s, 3H); <sup>13</sup>C NMR (125 MHz, CDCl<sub>3</sub>) δ 142.7, 135.2, 128.1, 128.0.

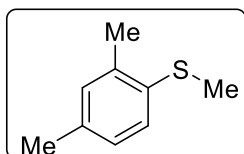

**(2,4-Dimethylphenyl)(methyl)sulfane (3oa).**<sup>2</sup> The representative procedure was followed using 1,2-bis(2,4-dimethylphenyl)disulfane (**1o**) (54.9 mg, 0.2 mmol) and

DMC (**2a**) (36.0 mg, 0.4 mmol). Isolation by column chromatography (*n*-hexane) yielded **3oa** (45.0 mg, 74%) as a colorless oil.  $^1\text{H}$  NMR (500 MHz,  $\text{CDCl}_3$ )  $\delta$  7.10 (d,  $J=10.0$  Hz, 1H), 6.91 (d,  $J=10.0$  Hz, 2H), 2.35 (s, 3H), 2.44 (s, 3H) 2.31 (s, 3H);  $^{13}\text{C}$  NMR (125 MHz,  $\text{CDCl}_3$ )  $\delta$  136.2, 134.7, 133.9, 130.8, 127.2, 125.8, 20.8, 20.0, 15.9.

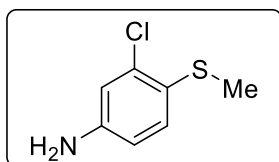

**3-Chloro-4-(methylthio)aniline (3pa).**<sup>8</sup> The representative procedure was followed using 4,4'-disulfanediylbis(3-chloroaniline) (**1p**) (63.5 mg, 0.2 mmol) and DMC (**2a**) (36.0 mg, 0.4 mmol). Isolation by column chromatography (petroleum ether : ethyl acetate = 10 : 1) yielded **3pa** (49.1 mg, 71%) as a brown solid.  $^1\text{H}$  NMR (500 MHz,  $\text{CDCl}_3$ )  $\delta$  7.16 (d,  $J=8.0$  Hz, 1H), 6.59 – 6.56 (m, 2H), 4.25 (br, 2H), 2.21 (s, 3H);  $^{13}\text{C}$  NMR (125 MHz,  $\text{CDCl}_3$ )  $\delta$  148.1, 134.6, 134.5, 118.5, 118.4, 114.3, 17.8. HRMS (ESI)  $m/z$  ( $[\text{M}^+ \text{H}]^+$ ) Calcd. for  $\text{C}_7\text{H}_8\text{ClNS}$  174.0139, found: 174.0138. Melting point: 74 °C

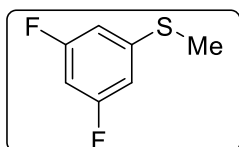

**(3,5-Difluorophenyl)(methyl)sulfane (3qa).**<sup>2</sup> The representative procedure was followed using 1,2-bis(3,5-difluorophenyl)disulfane (**1q**) (58.1 mg, 0.2 mmol) and DMC (**2a**) (36.0 mg, 0.4 mmol). Isolation by column chromatography (*n*-hexane) yielded **3qa** (44.2 mg, 69%) as a colorless oil.  $^1\text{H}$  NMR (500 MHz,  $\text{CDCl}_3$ )  $\delta$  6.75 – 6.72 (m, 2H), 6.58 – 6.54 (m, 1H), 2.47 (s, 3H);  $^{13}\text{C}$  NMR (125 MHz,  $\text{CDCl}_3$ )  $\delta$  163.1 (dd,  $J=261.3, 13.8$  Hz), 143.0, 108.6 (dd,  $J=21.3, 7.5$  Hz), 100.3 (dd,  $J=25.5, 7.0$  Hz), 15.3;  $^{19}\text{F}$  NMR (471 MHz,  $\text{CDCl}_3$ )  $\delta$  -109.72.

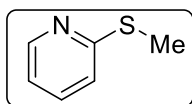

**2-(Methylthio)pyridine (3ra).**<sup>3</sup> The representative procedure was followed using 1,2-

di(pyridin-2-yl)disulfane (**1r**) (44.1 mg, 0.2 mmol) and DMC (**2a**) (36.0 mg, 0.4 mmol). Isolation by column chromatography (petroleum ether : ethyl acetate = 20 : 1) yielded **3ra** (20.0 mg, 40%) as a colorless oil.  $^1\text{H}$  NMR (500 MHz,  $\text{CDCl}_3$ )  $\delta$  8.36 – 8.35 (m, 1H), 7.41 – 7.37 (m, 1H), 7.10 – 7.08 (m, 1H), 6.89 – 6.87 (m, 1H), 2.48 (s, 3H);  $^{13}\text{C}$  NMR (125 MHz,  $\text{CDCl}_3$ )  $\delta$  159.9, 149.4, 135.7, 121.4, 119.0, 13.2.

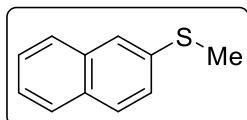

**Methyl(naphthalen-2-yl)sulfane (3sa).**<sup>2</sup> The representative procedure was followed using 1,2-di(naphthalen-2-yl)disulfane (**1s**) (63.7 mg, 0.2 mmol) and DMC (**2a**) (36.0 mg, 0.4 mmol). Isolation by column chromatography (*n*-hexane) yielded **3sa** (59.2 mg, 85%) as a white solid.  $^1\text{H}$  NMR (500 MHz,  $\text{CDCl}_3$ )  $\delta$  7.76 – 7.75 (m, 1H), 7.72 – 7.70 (m, 2H), 7.55 (s, 1H), 7.46 – 7.43 (m, 1H), 7.40 – 7.35 (m, 2H), 2.56 (s, 3H);  $^{13}\text{C}$  NMR (125 MHz,  $\text{CDCl}_3$ )  $\delta$  136.1, 133.9, 131.3, 128.2, 127.8, 126.8, 126.6, 125.7, 125.3, 123.4, 15.8. Melting point: 62 °C.

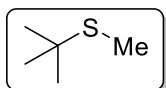

**Tert-Butyl(methyl)sulfane (3ta).**<sup>9</sup> The representative procedure was followed using 1,2-di-*tert*-butyldisulfane (**1t**) (35.6 mg, 0.2 mmol) and DMC (**2a**) (36.0 mg, 0.4 mmol). Isolation by column chromatography (*n*-hexane) yielded **3ta** (32.0 mg, 77%) as a colorless oil.  $^1\text{H}$  NMR (500 MHz,  $\text{CDCl}_3$ )  $\delta$  2.05 (s, 3H), 1.31 (s, 9H);  $^{13}\text{C}$  NMR (125 MHz,  $\text{CDCl}_3$ )  $\delta$  40.6, 30.1, 11.3.

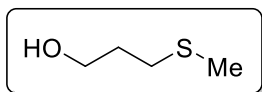

**3-(Methylthio)propan-1-ol (3ua).**<sup>10</sup> The representative procedure was followed using 3,3'-disulfanediyldis(propan-1-ol) (**1u**) (36.4 mg, 0.2 mmol) and DMC (**2a**) (36.0 mg,

0.4 mmol). Isolation by column chromatography (*n*-hexane) yielded **3ua** (23.4 mg, 55%) as a colorless oil. **<sup>1</sup>H NMR (500 MHz, CDCl<sub>3</sub>)**  $\delta$  3.75 – 3.72 (m, 2H), 2.63 – 2.60 (m, 2H), 3.52 – 2.50 (br, 1H), 2.12 (s, 3H), 1.88 – 1.83 (m, 2H); **<sup>13</sup>C NMR (125 MHz, CDCl<sub>3</sub>)**  $\delta$  61.4, 31.3, 30.8, 15.3.

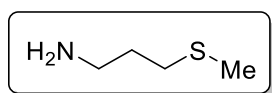

**3-(Methylthio)propan-1-amine (3va).**<sup>11</sup> The representative procedure was followed using 3,3'-disulfanediyldis(propan-1-amine) (**1v**) (36.2 mg, 0.2 mmol) and DMC (**2a**) (36.0 mg, 0.4 mmol). Isolation by column chromatography (petroleum ether : ethyl acetate = 10 : 1) yielded **3va** (26.4 mg, 66%) as a colorless oil. **<sup>1</sup>H NMR (500 MHz, CDCl<sub>3</sub>)**  $\delta$  2.74 – 2.71 (m, 2H), 2.50 – 2.46 (m, 2H), 2.03 (s, 3H), 1.70 – 1.65 (m, 2H), 1.19 (br, 2H); **<sup>13</sup>C NMR (125 MHz, CDCl<sub>3</sub>)**  $\delta$  40.90, 32.61, 31.43, 15.3. HRMS (ESI) *m/z* ([M+ H]<sup>+</sup>) Calcd. for C<sub>4</sub>H<sub>11</sub>NS 106.0685, found: 106.0684.

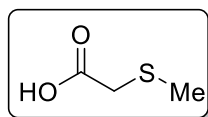

**2-(Methylthio)acetic acid (3wa).**<sup>12</sup> The representative procedure was followed using 2,2'-disulfanediyldiacetic acid (**1w**) (36.4 mg, 0.2 mmol) and DMC (**2a**) (36.0 mg, 0.4 mmol). Isolation by column chromatography (DCM : MeOH = 5 : 1) yielded **3wa** (18.2 mg, 43%) as a colorless oil; **<sup>1</sup>H NMR (500 MHz, CDCl<sub>3</sub>)**  $\delta$  10.75 (br, 1H), 3.20 (s, 2H), 2.20 (s, 3H); **<sup>13</sup>C NMR (125 MHz, CDCl<sub>3</sub>)**  $\delta$  176.5, 35.3, 16.1.

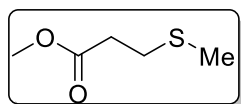

**Methyl 3-(methylthio)propanoate (3xa).**<sup>13</sup> The representative procedure was followed using dimethyl 3,3'-disulfanediyldipropionate (**1x**) (47.6 mg, 0.2 mmol) and DMC (**2a**) (36.0 mg, 0.4 mmol). Isolation by column chromatography (*n*-hexane: ethyl acetate = 20 : 1) yielded **3xa** (38.1 mg, 43%) as a colorless oil. **<sup>1</sup>H NMR (500 MHz,**

$\text{CDCl}_3$ )  $\delta$  3.70 (s, 3H), 2.79 – 2.76 (m, 2H), 2.65 – 2.62 (m, 2H), 2.13 (s, 3H);  $^{13}\text{C}$  NMR (125 MHz,  $\text{CDCl}_3$ )  $\delta$  172.2, 51.6, 34.1, 28.9, 15.3.

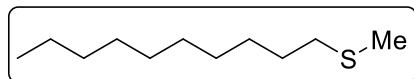

**Decyl(methyl)sulfane (3ya).**<sup>14</sup> The representative procedure was followed using 1,2-didecyldisulfane (**1y**) (69.3 mg, 0.2 mmol) and DMC (**2a**) (36.0 mg, 0.4 mmol). Isolation by column chromatography (*n*-hexane) yielded **3ya** (55.0 mg, 79%) as a colorless oil.  $^1\text{H}$  NMR (500 MHz,  $\text{CDCl}_3$ )  $\delta$  2.49 (t,  $J$  = 7.5 Hz, 2H), 2.10 (s, 3H), 1.62 – 1.56 (m, 2H), 1.31 – 1.26 (m, 14H), 0.89 – 0.87 (m, 3H);  $^{13}\text{C}$  NMR (125 MHz,  $\text{CDCl}_3$ )  $\delta$  34.3, 31.2, 29.6, 29.5, 29.3, 29.2, 29.1, 28.8, 22.7, 15.5, 14.1.

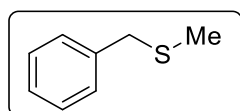

**Benzyl(methyl)sulfane (3za).**<sup>15</sup> The representative procedure was followed using 1,2-dibenzylldisulfane (**1z**) (49.3 mg, 0.2 mmol) and DMC (**2a**) (36.0 mg, 0.4 mmol). Isolation by column chromatography (*n*-hexane) yielded **3za** (44.7 mg, 81%) as a colorless oil.  $^1\text{H}$  NMR (500 MHz,  $\text{CDCl}_3$ )  $\delta$  7.25 – 7.22 (m, 4H), 7.28 – 7.16 (m, 1H), 3.06 (s, 2H), 1.92 (s, 3H);  $^{13}\text{C}$  NMR (125 MHz,  $\text{CDCl}_3$ )  $\delta$  138.2, 128.8, 128.4, 126.9, 38.3, 14.9.

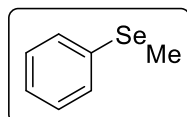

**Methyl(phenyl)selane (3a'a).**<sup>16</sup> The representative procedure was followed using 1,2-diphenyldiselane (**1a'**) (30.8 mg, 0.2 mmol) and DMC (**2a**) (36.0 mg, 0.4 mmol). Isolation by column chromatography (*n*-hexane) yielded **3a'a** (62.4 mg, 51%) as a colorless oil.  $^1\text{H}$  NMR (500 MHz,  $\text{CDCl}_3$ )  $\delta$  8.38 – 8.36 (m, 1H), 7.42 – 7.39 (m, 1H), 7.12 – 7.10 (m, 1H), 6.91 – 6.89 (m, 1H), 2.50 (s, 3H);  $^{13}\text{C}$  NMR (125 MHz,  $\text{CDCl}_3$ )  $\delta$  149.4, 135.7, 121.5, 119.1, 13.2.

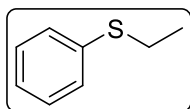

**Ethyl(phenyl)sulfane (3ab).**<sup>17</sup> The representative procedure was followed using 1,2-diphenyldisulfane (**1a**) (43.7 mg, 0.2 mmol) and diethyl carbonate (**2b**) (47.3 mg, 0.4 mmol). Isolation by column chromatography (*n*-hexane) yielded **3ab** (37.5 mg, 68%) as a yellow oil. <sup>1</sup>H NMR (500 MHz, CDCl<sub>3</sub>)  $\delta$  7.32 – 7.30 (m, 2H), 7.27 – 7.24 (m, 2H), 7.16 – 7.13 (m, 1H), 2.92 (q, *J* = 7.5 Hz, 2H), 1.29 (t, *J* = 7.5 Hz, 3H); <sup>13</sup>C NMR (125 MHz, CDCl<sub>3</sub>)  $\delta$  136.6, 128.9, 128.7, 125.6, 27.5, 14.3.

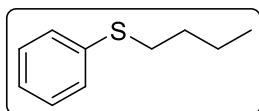

**Butyl(phenyl)sulfane (3ac).**<sup>18</sup> The representative procedure was followed using 1,2-diphenyldisulfane (**1a**) (43.7 mg, 0.2 mmol) and dibutyl carbonate (**2c**) (69.7 mg, 0.4 mmol). Isolation by column chromatography (*n*-hexane) yielded **3ac** (39.8 mg, 60%) as a colorless oil. <sup>1</sup>H NMR (500 MHz, CDCl<sub>3</sub>)  $\delta$  7.26 – 7.24 (m, 2H), 7.21 – 7.17 (m, 2H), 7.10 – 7.07 (m, 1H), 2.47 (t, *J* = 7.5 Hz, 2H), 1.58 – 1.53 (m, 2H), 1.40 – 1.35 (m, 2H), 0.85 (t, *J* = 7.5 Hz, 3H); <sup>13</sup>C NMR (125 MHz, CDCl<sub>3</sub>)  $\delta$  137.0, 128.8, 125.6, 33.2, 31.2, 21.9, 13.6.

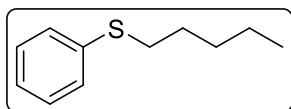

**Benzyl(methyl)sulfane (3ad).**<sup>19</sup> The representative procedure was followed using 1,2-diphenyldisulfane (**1a**) (43.7 mg, 0.2 mmol) and dipentyl carbonate (**2d**) (80.9 mg, 0.4 mmol). Isolation by column chromatography (*n*-hexane) yielded **3ad** (51.1 mg, 71%) as a colorless oil. <sup>1</sup>H NMR (500 MHz, CDCl<sub>3</sub>)  $\delta$  7.25 – 7.17 (m, 4H), 7.09–7.06 (m, 1H), 2.84 (t, *J* = 7.5 Hz, 2H), 1.61 – 1.55 (m, 2H), 1.36 – 1.23 (m, 4H), 0.82 (t, *J* = 7.5 Hz, 3H); <sup>13</sup>C NMR (125 MHz, CDCl<sub>3</sub>)  $\delta$  137.0, 128.8, 125.6, 33.5, 31.0, 28.8, 22.2, 13.9.

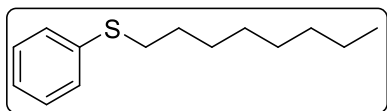

**Benzyl(methyl)sulfane (3ae).**<sup>14</sup> The representative procedure was followed using 1,2-diphenyldisulfane (**1a**) (43.7 mg, 0.2 mmol) and dimethyl carbonate (**2e**) (114.6 mg, 0.4 mmol). Isolation by column chromatography (*n*-hexane) yielded **3ae** (53.3 mg, 60%) as a colorless oil. <sup>1</sup>H NMR (500 MHz, CDCl<sub>3</sub>)  $\delta$  7.25 – 7.23 (m, 2H), 7.21–7.17 (m, 2H), 7.09 – 7.06 (m, 1H), 2.83 (t, *J* = 7.5 Hz, 2H), 1.60 – 1.54 (m, 2H), 1.35 – 1.32 (m, 2H), 1.20 – 1.18 (m, 8H), 0.80 (t, *J* = 7.5 Hz, 3H); <sup>13</sup>C NMR (125 MHz, CDCl<sub>3</sub>)  $\delta$  137.0, 128.8, 125.6, 33.5, 31.8, 29.2, 29.1, 28.8, 22.6, 14.1.

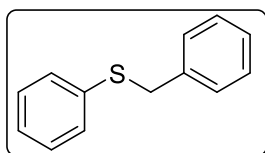

**Benzyl(methyl)sulfane (3af).**<sup>20</sup> The representative procedure was followed using 1,2-diphenyldisulfane (**1a**) (43.7 mg, 0.2 mmol) and dibenzyl carbonate (**2f**) (96.9 mg, 0.4 mmol). Isolation by column chromatography (*n*-hexane) yielded **3af** (57.6 mg, 72%) as a white solid. <sup>1</sup>H NMR (500 MHz, CDCl<sub>3</sub>)  $\delta$  7.28 – 7.18 (m, 9H), 7.13 – 7.11 (m, 1H), 4.0 (s, 2H); <sup>13</sup>C NMR (125 MHz, CDCl<sub>3</sub>)  $\delta$  137.3, 136.3, 129.6, 128.7, 128.71, 128.70, 128.4, 127.0, 126.2, 38.9. Melting point: 42 °C.

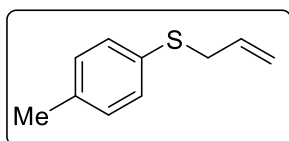

**Benzyl(methyl)sulfane (3ag).**<sup>21</sup> The representative procedure was followed using 1,2-di-*p*-tolylldisulfane (**1a**) (49.3 mg, 0.2 mmol) and dimethyl carbonate (**2g**) (56.9 mg, 0.4 mmol). Isolation by column chromatography (*n*-hexane) yielded **3ag** (35.4 mg, 54%) as a colorless oil. <sup>1</sup>H NMR (500 MHz, CDCl<sub>3</sub>)  $\delta$  7.17 (d, *J* = 8.0 Hz, 2H), 7.00 (d, *J* = 8.0 Hz, 2H), 5.82 – 5.73 (m, 1H), 5.01 – 4.94 (m, 2H), 3.40 (d, *J* = 7.0 Hz, 2H), 2.22 (s, 3H); <sup>13</sup>C NMR (125 MHz, CDCl<sub>3</sub>)  $\delta$  136.3, 133.8, 132.0, 130.1, 129.7, 129.5, 128.5, 117.3, 37.8, 20.9.

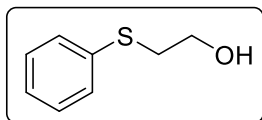

**2-(Phenylthio)ethan-1-ol (3ah).**<sup>22</sup> The representative procedure was followed using 1,2-diphenyldisulfane (**1a**) (43.7 mg, 0.2 mmol) and bis(2-hydroxyethyl) carbonate (**2h**) (60.2 mg, 0.4 mmol). Isolation by column chromatography (*n*-hexane: ethyl acetate = 4 : 1) yielded **3ah** (37.59 mg, 61%) as a colorless oil. <sup>1</sup>H NMR (500 MHz, CDCl<sub>3</sub>)  $\delta$  7.26 (d, *J* = 11.5 Hz, 2H), 7.17 (t, *J* = 7.5 Hz, 2H), 7.09 (t, *J* = 7.5 Hz, 2H), 3.61 (t, *J* = 6.5 Hz, 2H), 2.97 (t, *J* = 6.5 Hz, 2H); <sup>13</sup>C NMR (125 MHz, CDCl<sub>3</sub>)  $\delta$  134.9, 129.7, 128.9, 126.3, 60.2, 36.7.

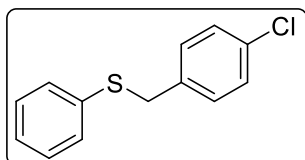

**(4-Chlorobenzyl)(phenyl)sulfane (3ai).**<sup>23</sup> The representative procedure was followed using 1,2-diphenyldisulfane (**1a**) (43.7 mg, 0.2 mmol) and bis(4-chlorobenzyl) carbonate (**2i**) (124.0 mg, 0.4 mmol). Isolation by column chromatography (*n*-hexane) yielded **3ai** (62.79 mg, 61%) as a colorless oil. <sup>1</sup>H NMR (500 MHz, CDCl<sub>3</sub>)  $\delta$  7.17 – 7.19 (m, 6H), 7.09 – 7.07 (m, 3H), 3.94 (s, 2H); <sup>13</sup>C NMR (125 MHz, CDCl<sub>3</sub>)  $\delta$  136.1, 135.6, 132.8, 130.1, 130.0, 128.8, 128.5, 126.6, 38.3.

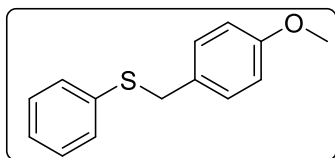

**(4-Methoxybenzyl)(phenyl)sulfane (3aj).**<sup>24</sup> The representative procedure was followed using 1,2-diphenyldisulfane (**1a**) (43.7 mg, 0.2 mmol) and bis(4-methoxybenzyl) carbonate (**2j**) (120.8 mg, 0.4 mmol). Isolation by column chromatography (*n*-hexane: ethyl acetate = 20 : 1) yielded **3aj** (58.88 mg, 64%) as a colorless oil. <sup>1</sup>H NMR (500 MHz, CDCl<sub>3</sub>)  $\delta$  7.21 (d, *J* = 7.5 Hz, 2H), 7.17 – 7.06 (m, 5H), 3.98 (s, 2H), 3.67 (s, 3H); <sup>13</sup>C NMR (125 MHz, CDCl<sub>3</sub>)  $\delta$  157, 136.5, 129.9,

129.6, 129.3, 128.7, 126.2, 113.8, 55.2, 38.3.

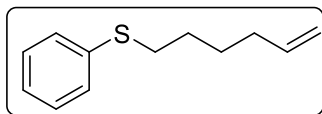

**Hex-5-en-1-yl(phenyl)sulfane (3ak).**<sup>24</sup> The representative procedure was followed using 1,2-diphenyldisulfane (**1a**) (43.7 mg, 0.2 mmol) and di(hex-5-en-1-yl) carbonate (**2k**) (90.5 mg, 0.4 mmol). Isolation by column chromatography (*n*-hexane) yielded **3ak** (27.67 mg, 36%) as a colorless oil. <sup>1</sup>H NMR (500 MHz, CDCl<sub>3</sub>)  $\delta$  7.26 – 7.18 (m, 4H), 7.11 – 7.07 (m, 1H), 5.77 – 5.67 (m, 1H), 4.96 – 4.86 (m, 2H), 2.85 (t, *J* = 9.0 Hz, 2H), 2.00 (q, *J* = 9.0 Hz, 2H), 1.64 – 1.56 (m, 2H), 1.49 – 1.44 (m, 2H); <sup>13</sup>C NMR (125 MHz, CDCl<sub>3</sub>)  $\delta$  138.4, 136.9, 128.9, 128.8, 125.7, 114.7, 33.5, 33.2, 28.6, 28.0.

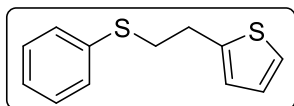

**2-[2-(Phenylthio)ethyl]thiophene (3al).** The representative procedure was followed using 1,2-diphenyldisulfane (**1a**) (43.7 mg, 0.2 mmol) and bis(2-(thiophen-2-yl)ethyl) carbonate (**2l**) (112.8 mg, 0.4 mmol). Isolation by column chromatography (*n*-hexane) yielded **3al** (29.03 mg, 33%) as a colorless oil. <sup>1</sup>H NMR (500 MHz, CDCl<sub>3</sub>)  $\delta$  7.30 (d, *J* = 7.5 Hz, 2H), 7.23 (t, *J* = 7.5 Hz, 2H), 7.14 (d, *J* = 7.5 Hz, 1H), 7.08 (d, *J* = 5.0 Hz, 1H), 6.87 – 6.85 (m, 1H), 6.77 (d, *J* = 5.0 Hz, 1H), 3.13 (t, *J* = 7.0 Hz, 2H), 3.06 (t, *J* = 7.0 Hz, 2H); <sup>13</sup>C NMR (125 MHz, CDCl<sub>3</sub>)  $\delta$  142.6, 129.6, 129.0, 126.8, 126.2, 125.0, 123.7, 35.4, 29.9.

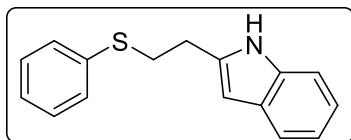

**2-[2-(Phenylthio)ethyl]-1H-indole (3am).** The representative procedure was followed using 1,2-diphenyldisulfane (**1a**) (43.7 mg, 0.2 mmol) and bis(2-(1H-indol-3-yl)ethyl) carbonate (**2m**) (139.3 mg, 0.4 mmol). Isolation by column chromatography (*n*-hexane: ethyl acetate = 4 : 1) yielded **3am** (43.53 mg, 43%) as a colorless oil. <sup>1</sup>H NMR (500

**MHz, CDCl<sub>3</sub>**)  $\delta$  7.83 (s, 1H), 7.47 (d,  $J$  = 8.0 Hz, 1H), 7.29 (d,  $J$  = 8.0 Hz, 2H), 7.24 – 7.19 (m, 2H), 7.14 – 7.08 (m, 2H), 7.05 – 7.02 (m, 1H), 6.92 (s, 1H), 3.17 (t,  $J$  = 8.5 Hz, 2H), 3.01 (t,  $J$  = 8.5 Hz, 2H); **<sup>13</sup>C NMR (125 MHz, CDCl<sub>3</sub>)**  $\delta$  136.6, 136.2, 129.0, 128.9, 127.1, 125.8, 122.1, 121.7, 119.4, 118.6, 114.6, 111.2, 34.2, 25.3. HRMS (ESI)  $m/z$  ([M+ H]<sup>+</sup>) Calcd. for C<sub>16</sub>H<sub>15</sub>NS 254.0998, found: 254.0999.

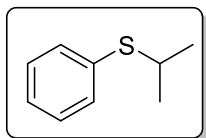

**Isopropyl(phenyl)sulfane (3an).**<sup>25</sup> The representative procedure was followed using 1,2-diphenyldisulfane (**1a**) (43.7 mg, 0.2 mmol) and di-isopropyl carbonate (**2h**) (58.4 mg, 0.4 mmol) at 180 °C. Isolation by column chromatography (*n*-hexane) yielded **3an** (38.3 mg, 63%) as a colorless oil. **<sup>1</sup>H NMR (500 MHz, CDCl<sub>3</sub>)**  $\delta$  7.34 – 7.32 (m, 2H), 7.24 – 7.21 (m, 2H), 7.17 – 7.14 (m, 1H), 3.33 – 3.28 (m, H), 1.22 (d,  $J$  = 7.0 Hz, 6H); **<sup>13</sup>C NMR (125 MHz, CDCl<sub>3</sub>)**  $\delta$  135.5, 131.9, 128.8, 126.7, 38.2, 23.1.

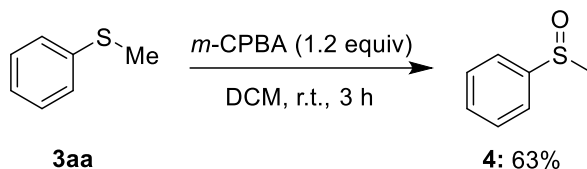

To a 10 mL Schlenk tube was added sequentially **3aa** (0.2 mmol) and DCM (0.4 mL) via syringe. Then *m*-CPBA (41.4 mg, 0.24 mmol, 1.2 equiv) was added. The resulting mixture was stirred at room temperature for 3 h. After the reaction was completed, the reaction was quenched with NaOH (1.0 M, 2.0 mL) and the crude mixture was extracted with DCM. The organic layer was dried, filtered, and concentrated. The residue was purified by column chromatography to afford product **4** as a colorless oil.<sup>25</sup> **<sup>1</sup>H NMR (500 MHz, CDCl<sub>3</sub>)**  $\delta$  7.58 – 7.56 (m, 2H), 7.47 – 7.42 (m, 3H), 2.64 (s, 3H). **<sup>13</sup>C NMR (125 MHz, CDCl<sub>3</sub>)**  $\delta$  145.5, 130.9, 129.2, 123.4, 43.8.<sup>27</sup>

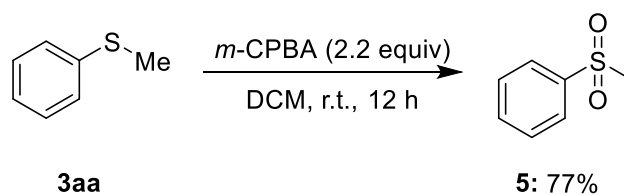

To a 10 mL Schlenk tube was added sequentially **3aa** (0.2 mmol) and DCM (0.4 mL) via syringe. Then *m*-CPBA (76 mg, 0.44 mmol, 2.2 equiv.) was added. The resulting mixture was stirred at room temperature for 3 h. After the reaction was completed, the reaction was quenched with NaOH (1.0 M, 2.0 mL) and crude mixture was extracted with DCM. The organic layer was dried, filtered, and concentrated. The residue was purified by column chromatography to afford product **5** as a colorless oil.<sup>26</sup> **<sup>1</sup>H NMR (500 MHz, CDCl<sub>3</sub>)**  $\delta$  7.87 – 7.85 (m, 2H), 7.58 (t, *J* = 7.5 Hz, 1H), 7.50 – 7.47 (m, 2H), 2.97 (s, 3H); **<sup>13</sup>C NMR (125 MHz, CDCl<sub>3</sub>)**  $\delta$  140.4, 133.6, 129.2, 127.1, 44.3.

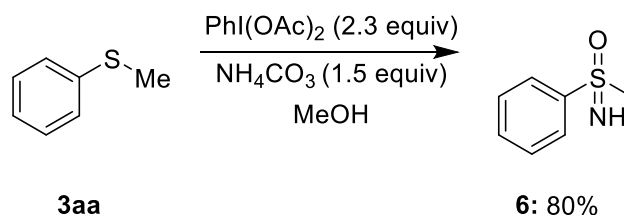

To a 10 mL Schlenk tube was added **3aa** (0.2 mmol) and MeOH (0.4 mL) via syringe. Then (NH<sub>4</sub>)<sub>2</sub>CO<sub>3</sub> (28.8mg, 0.3 mmol, 1.5 equiv) was added, followed by the PhI(OAc)<sub>2</sub> (148.1 mg, 0.46 mmol, 2.3 equiv) in one portion. The resulting mixture was stirred at room temperature for 0.5 h. After the reaction was completed, the solvent was removed under reduced pressure. Then, H<sub>2</sub>O (5 mL) was added into the reaction mixture and extracted with ethyl acetate (5 mL x 3). The organic layer was dried, filtered, and concentrated. The residue was purified by column chromatography to afford product **6** as a colorless oil.<sup>25</sup> **<sup>1</sup>H NMR (500 MHz, CDCl<sub>3</sub>)**  $\delta$  7.93 – 7.89 (m, 2H), 7.53 – 7.43 (m, 3H), 3.01 – 2.99 (s, 3H), 2.78 (br, 1H); **<sup>13</sup>C NMR (125 MHz, CDCl<sub>3</sub>)**  $\delta$  143.1, 132.7, 128.9, 127.3, 45.9.

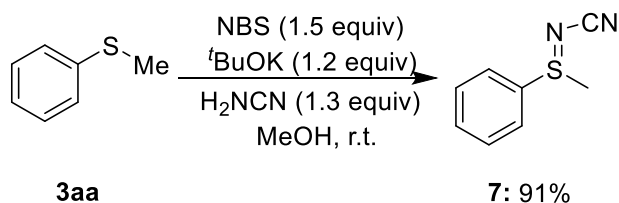

To a 10 mL Schlenk tube was added sequentially **3aa** (0.2 mmol) and MeOH (0.4 mL) via syringe. Then H<sub>2</sub>NCN (11.0 mg, 0.26 mmol, 1.3 equiv) was added, followed by the <sup>t</sup>BuOK (27 mg, 0.24 mmol, 1.2 equiv) in one portion. Subsequently NBS (53.4 mg, 1.5 equiv) was added. After the reaction was completed, the solvent was removed under reduced pressure. Then saturated aqueous Na<sub>2</sub>S<sub>2</sub>O<sub>3</sub> was added. The crude mixture was extracted with DCM. The organic layer was dried, filtered, and concentrated. The residue was purified by column chromatography to afford product **7** as a colorless oil.<sup>28</sup>

<sup>1</sup>H NMR (500 MHz, CDCl<sub>3</sub>) δ 7.73 – 7.71 (m, 2H), 7.56 – 7.52 (m, 3H), 2.95 (s, 3H);

<sup>13</sup>C NMR (125 MHz, CDCl<sub>3</sub>) δ 135.8, 132.8, 130.0, 125.6, 120.3, 36.3.

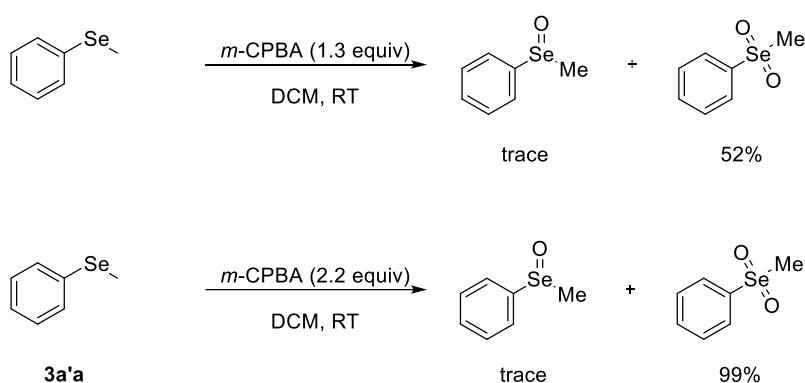

To a 10 mL Schlenk tube was added sequentially **3a'a** (0.2 mmol) and DCM (0.4 mL) via syringe. Then *m*-CPBA (76 mg, 0.44 mmol, 2.2 equiv.) was added. The resulting mixture was stirred at room temperature for 3 h. After the reaction was completed, the reaction was quenched with NaOH (1.0 M, 2.0 mL) and crude mixture was extracted with DCM. The organic layer was dried, filtered, and concentrated. The residue was purified by column chromatography to afford product (methylselenonyl)benzene as a colorless oil.<sup>29</sup>

<sup>1</sup>H NMR (500 MHz, CDCl<sub>3</sub>) δ 7.96 – 7.94 (m, 2H), 7.67 – 7.58 (m, 3H), 3.23 (s, 3H); <sup>13</sup>C NMR (125 MHz, CDCl<sub>3</sub>) δ 142.5, 134.4, 130.3, 126.5, 44.3.

## 4. References

- [1] S. J. Kempel, T.-W. Hsu, J. L. Nicholson and Q. Michaudel, *J. Am. Chem. Soc.*, 2023, **145**, 12459–12464.
- [2] R.-G. Miao, X. Qi and X.-F. Wu, *Eur. J. Org. Chem.*, 2021, **37**, 5219–5221.
- [3] X. Wu and Y. Wang, *Tetrahedron Letters.*, 2018, **59**, 1240–1243.
- [4] H.-L. Li, Y. Kuninobu and M. Kanai, *Angew. Chem., Int. Ed.*, 2017, **56**, 1495–1499.
- [5] R. J. K. Taylor, W. P. Unsworth and J. A. Rossi-Ashton, *ACS Catal.*, 2020, **10**, 5814–5820.
- [6] M. Teders, A. Gómez-Suárez, L. Pitzer, M. N. Hopkinson and F. Glorius, *Angew. Chem., Int. Ed.*, 2017, **56**, 902–906.
- [7] H. Ishikawa, N. Nakatani, S. Yamaguchi, T. Mizugaki and T. Mitsudome, *ACS Catal.*, 2023, **13**, 5744–5751.
- [8] J. Spencer, R. P. Rathnam, H. Patel and N. Anjum, *Tetrahedron*, 2008, **64**, 10195–10200.
- [9] S. Enthaler, *Catal. Sci. Technol.*, 2011, **1**, 104–110.
- [10] M. J. Burk, A. Gerlach, and D. Semmeril, *J. Org. Chem.*, 2000, **65**, 8933–8939.
- [11] S. Barata-Vallejo, C. Ferreri, A. Postigo and C. Chatgililoglu, *Chem. Res. Toxicol.*, 2010, **23**, 258–263.
- [12] Q. Liang, J. Zhang, W. Quan, Y. Sun, X. She and X. Pan, *J. Org. Chem.*, 2007, **72**, 2694–2697.
- [13] I. Burkhardt, L. Lauterbach, N. L. Brockb and J. S. Dickschat, *Org. Biomol. Chem.*, 2017, **15**, 4432–4439.
- [14] S. K. Kristensen, S. L. R. Laursen, E. Taarning and T. Skrydstrup, *Angew. Chem., Int. Ed.*, 2018, **57**, 13887–13891.
- [15] A. Toutchkine, D. Aebisher and E. L. Clennan, *J. Am. Chem. Soc.*, 2001, **123**, 4966–4973.
- [16] R. J. Cohen, D. L. Fox and R. N. Salvatore, *J. Org. Chem.*, 2004, **69**, 4265–4268.
- [17] S. Anselmi, S. Liu, S.-H. Kim, S. M. Barry, T. S. Moody and D. Castagnolo, *Org. Biomol. Chem.*, 2021, **19**, 156–161.
- [18] S. Vijaikumar and K. Pitchumani, *J. Mol. Catal. A-Chem.*, 2004, **217**, 117–120.
- [19] V. K. Akkilagunta and R. R. Kakulapati, *J. Org. Chem.*, 2011, **76**, 6819–682.
- [20] T. Liu, R. Qiu, L. Zhu, S.-F. Yin, C.-T. Au and N. Kambe, *Chem. Asian J.*, 2018, **13**, 3833–

3837.

- [21] O. G. Manchenao, O. Bistri and C. Bolm, *Org. Lett.*, 2007, **9**, 3809–3811.
- [22] J. Cheng, J. Wu and S. Cao, *Tetrahedron Letters*, 2011, **52**, 3481–3484.
- [23] I. Sorribes and A. Corma, *Chem. Sci.*, 2019, **10**, 3130–3142.
- [24] Y. Fang, T. Rogge, L. Ackermann, S.-Y Wang and S.-J. Ji, *Nat. Commun.*, 2018, **9**, 2240.
- [25] N Kennedy, P. Liu and T. Cohen, *Angew. Chem., Int. Ed.*, 2016, **55**, 383–386.
- [26] P. Pei, M. Zhao, D. Lin, Z. Dong, L. Song and L.-A. Chen, *Angew. Chem., Int. Ed.*, 2023, **62**, e202305510.
- [27] J. A. Johnson, X. Zhang, T. C. Reeson, Y.-S. Chen and J. Zhang, *J. Am. Chem. Soc.*, 2014, **136**, 15881–15884.
- [28] Y. Xie, B. Zhou, S. Zhou, S. Zhou, W. Wei, J. Liu, Y. Zhan, D. Cheng, M. Chen, Y. Li, B. Wang, X.-S. Xue and Z. Li, *ChemistrySelect*, 2017, **2**, 1620–1624.
- [29] D. Antoniak and M. Barbasiewicz, *Org. Lett.*, 2019, **21**, 9320–9325.

## 5. NMR Spectra

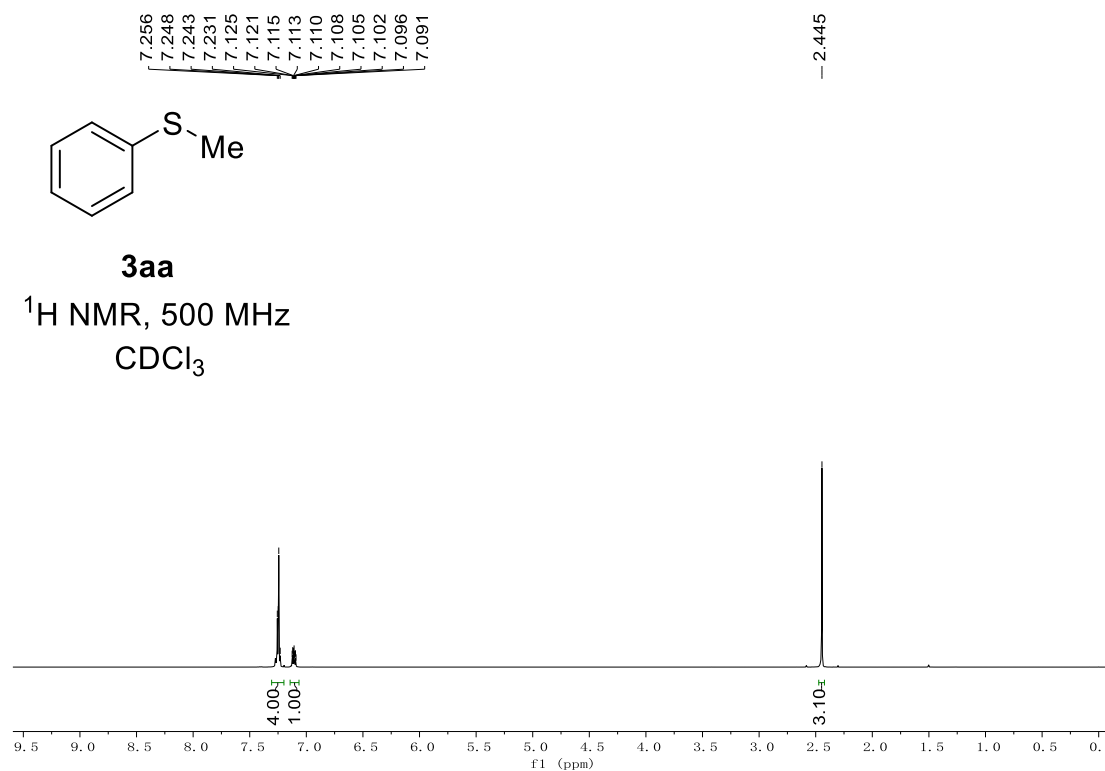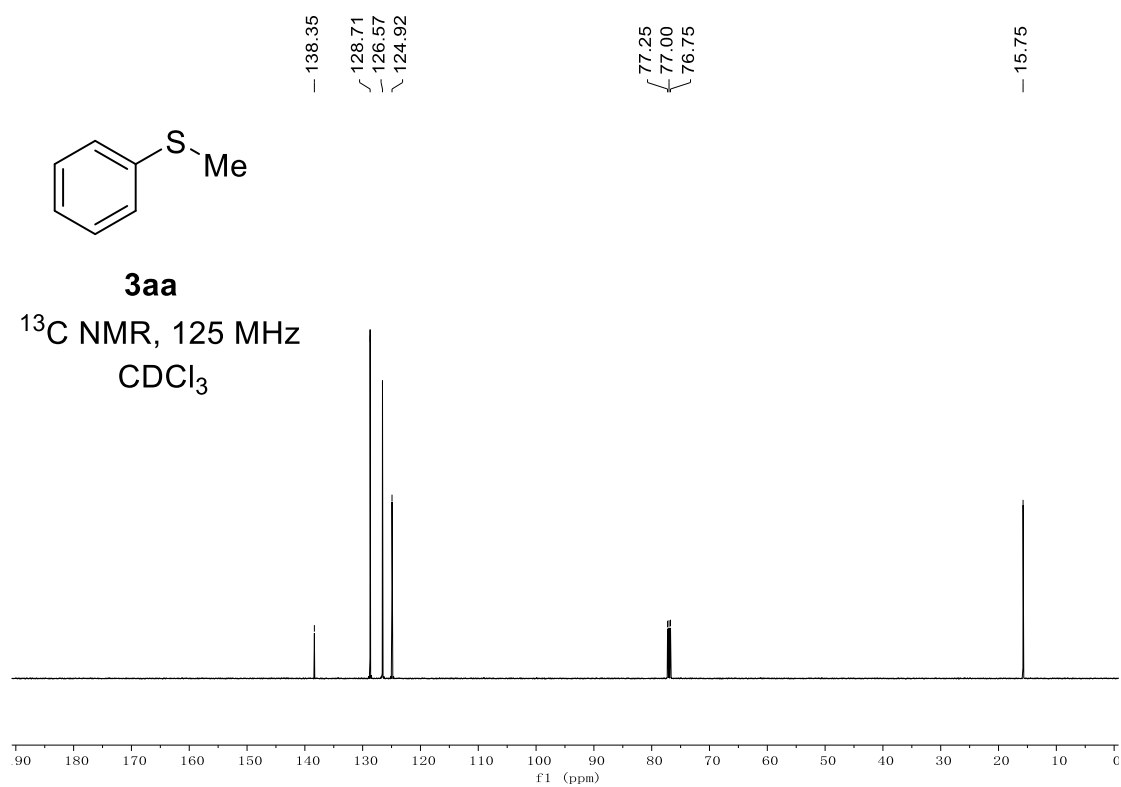

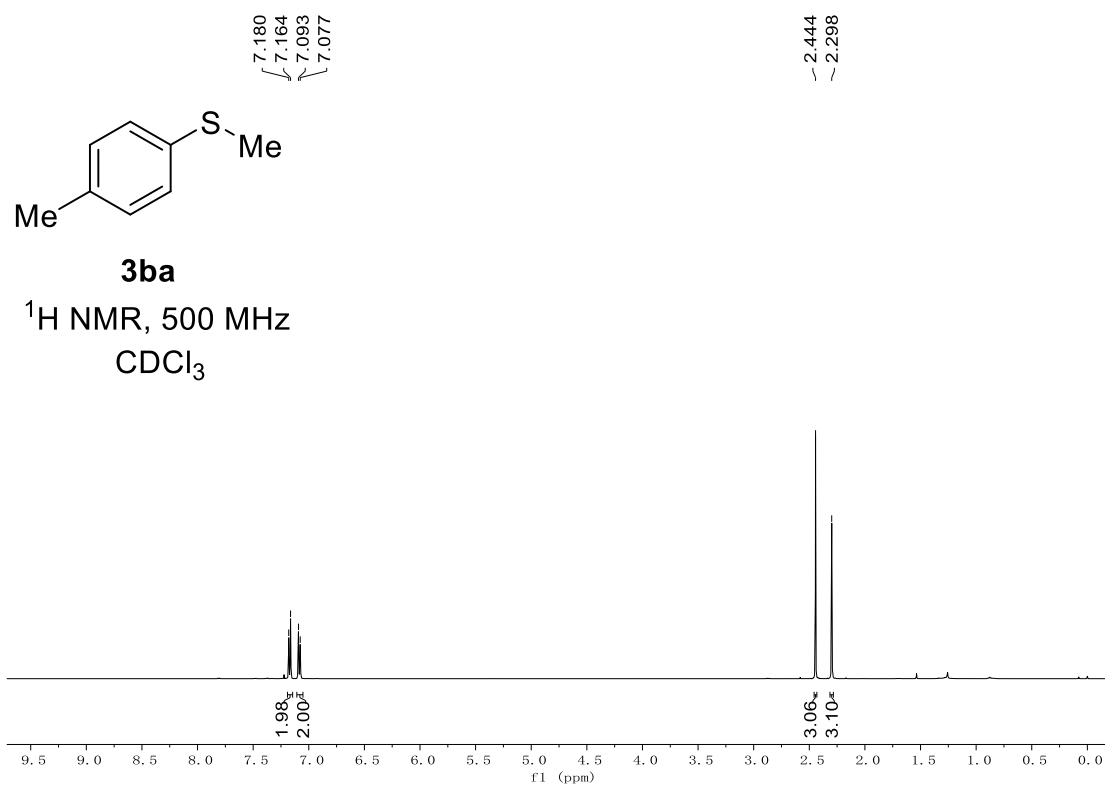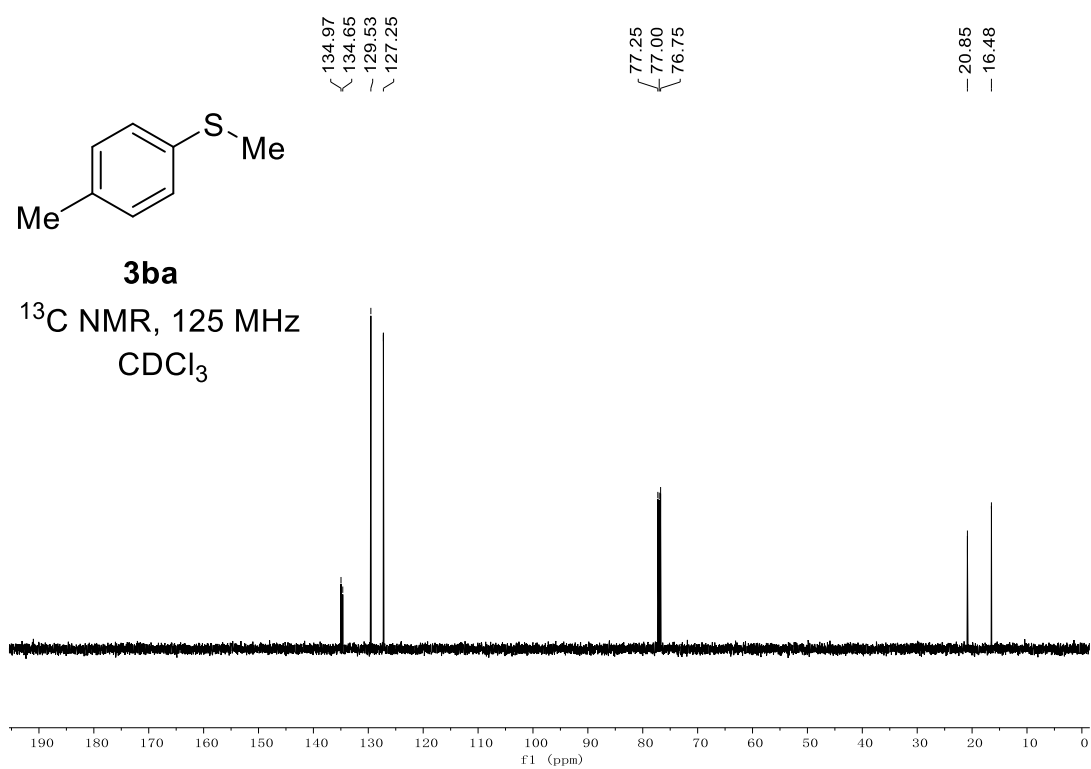

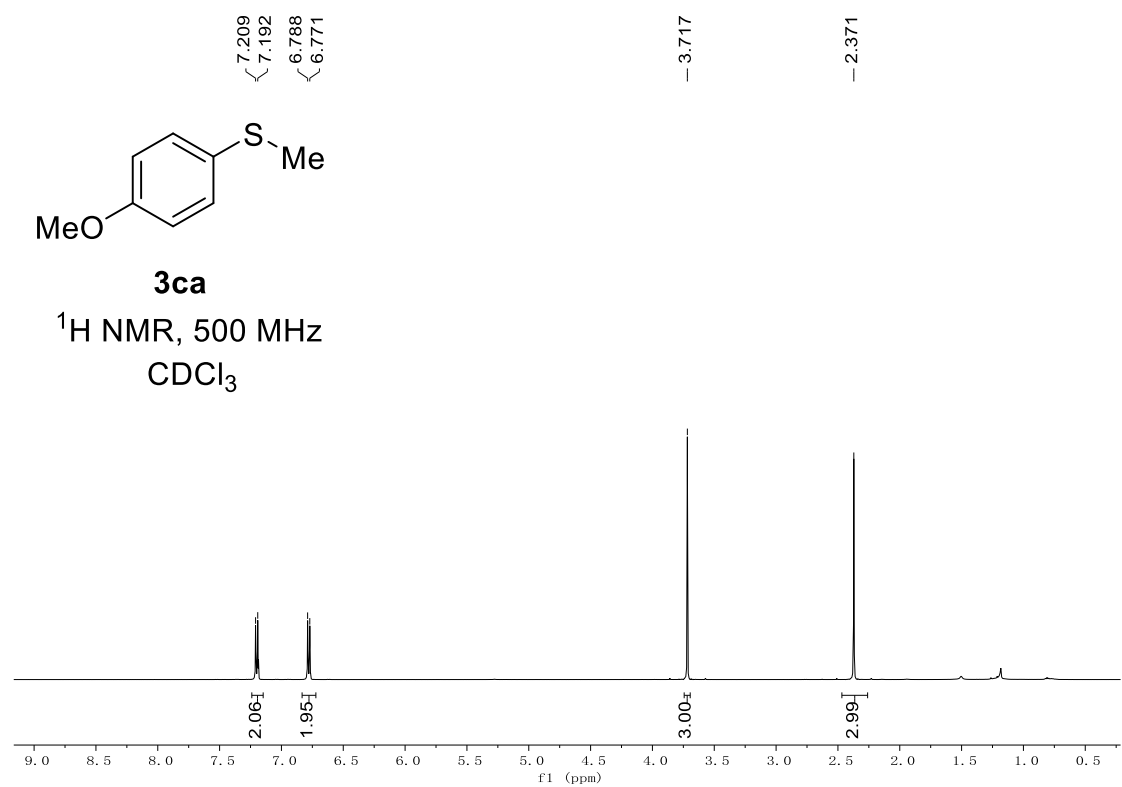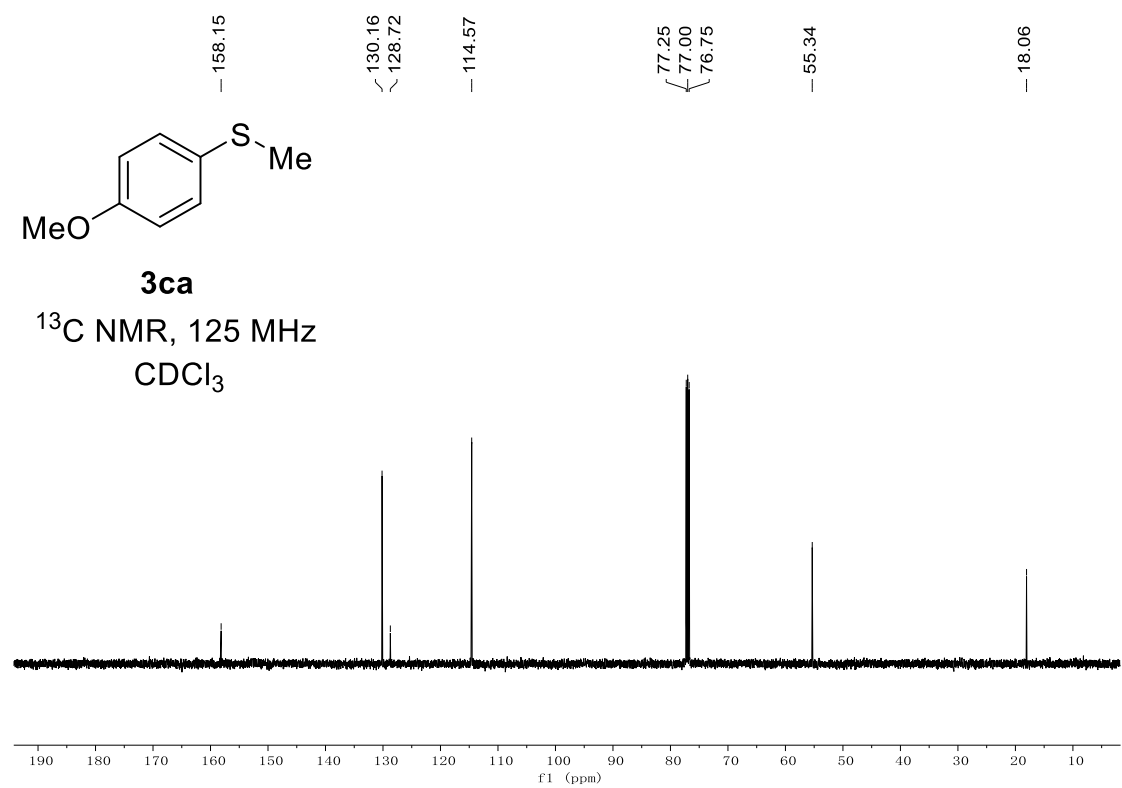

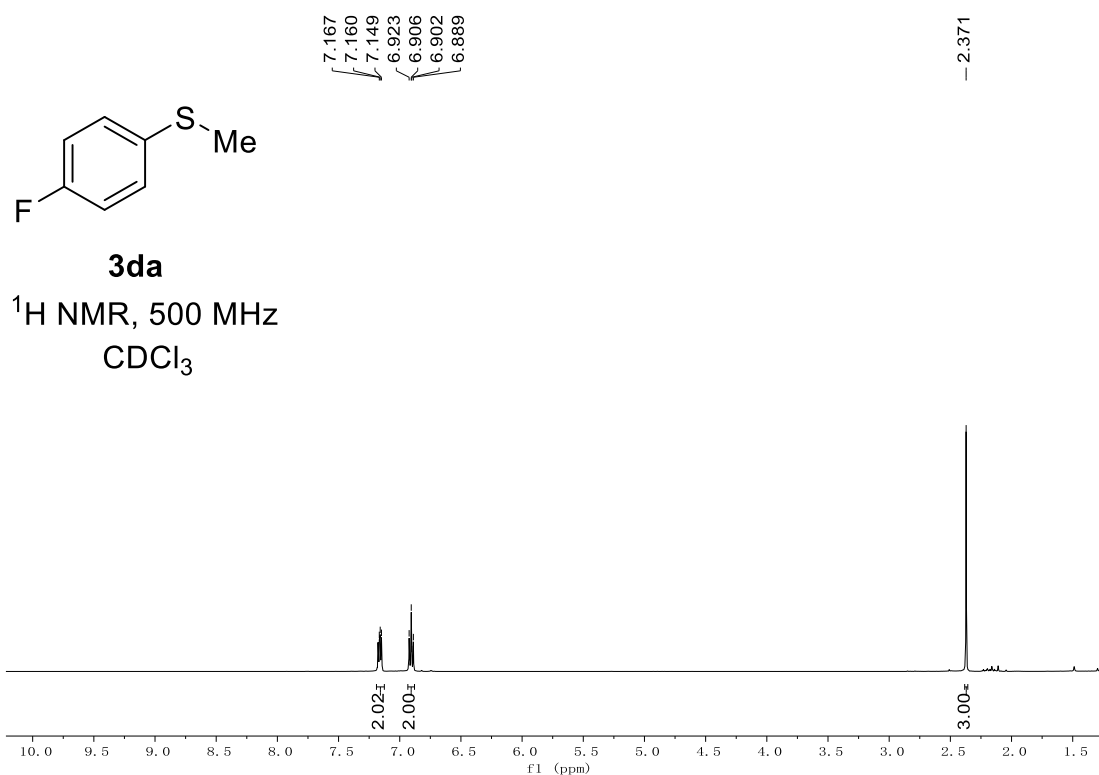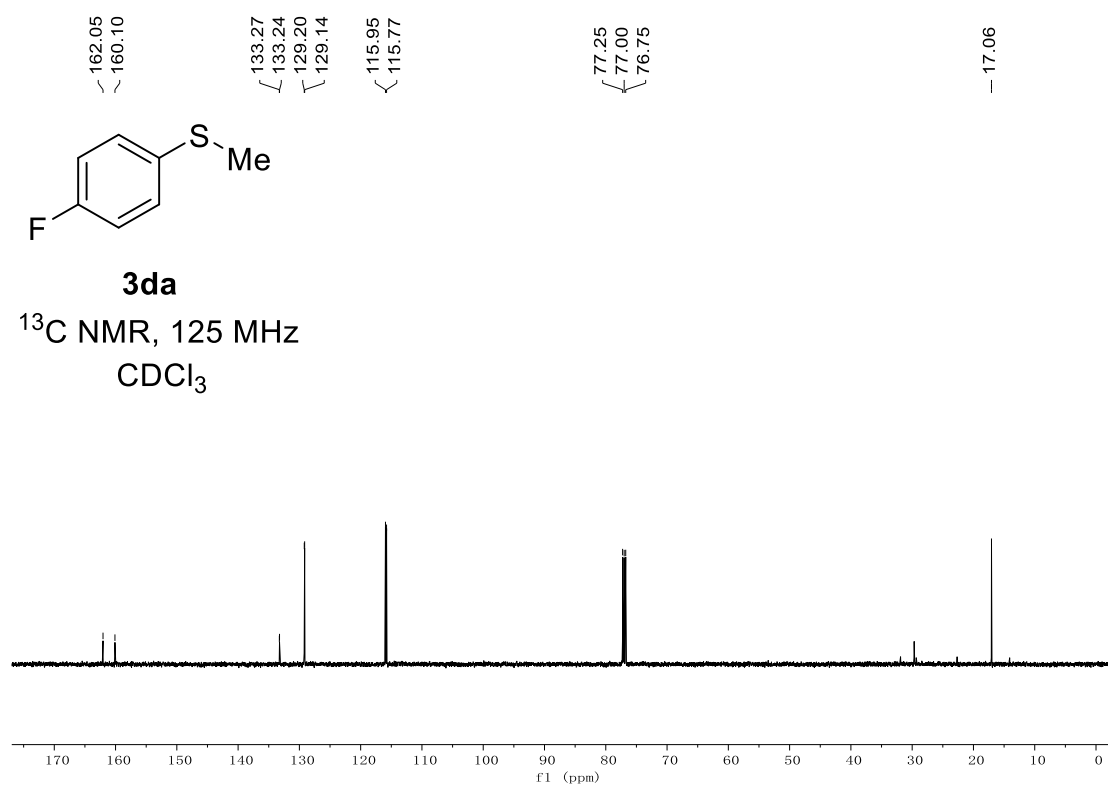

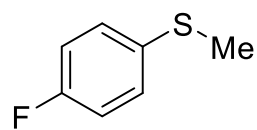

**3da**

$^{19}\text{F}$  NMR, 471 MHz

$\text{CDCl}_3$

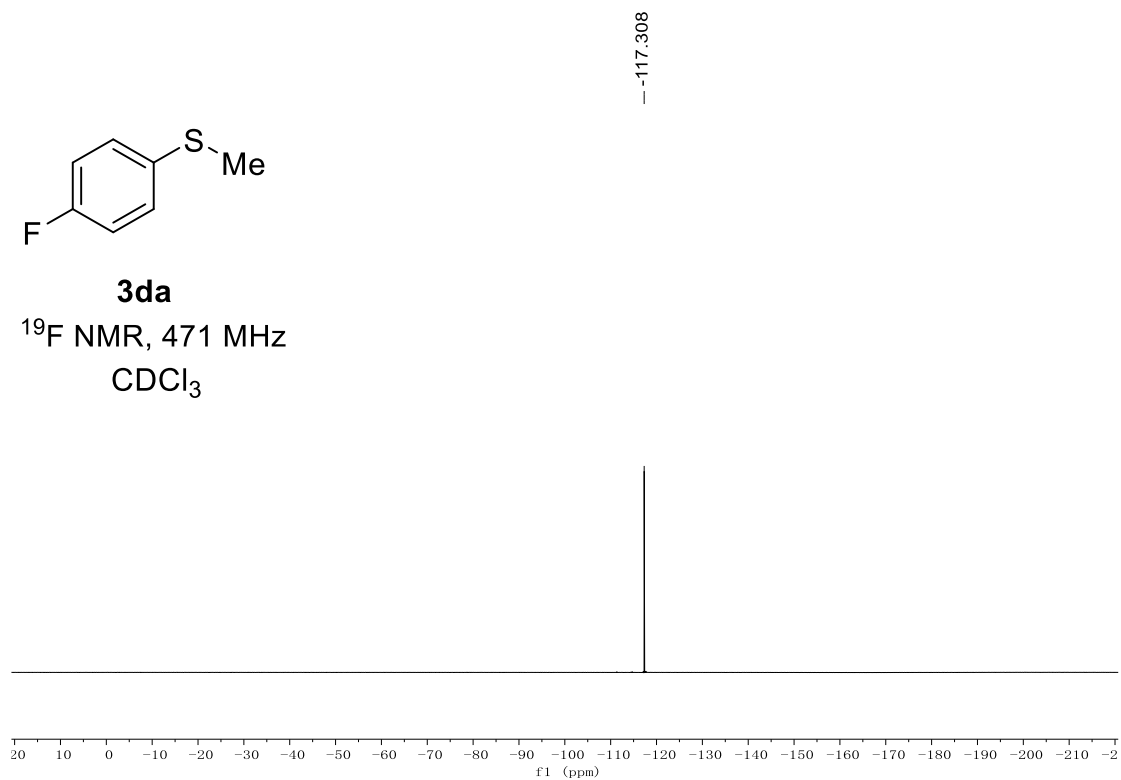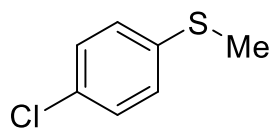

**3ea**

$^1\text{H}$  NMR, 500 MHz

$\text{CDCl}_3$

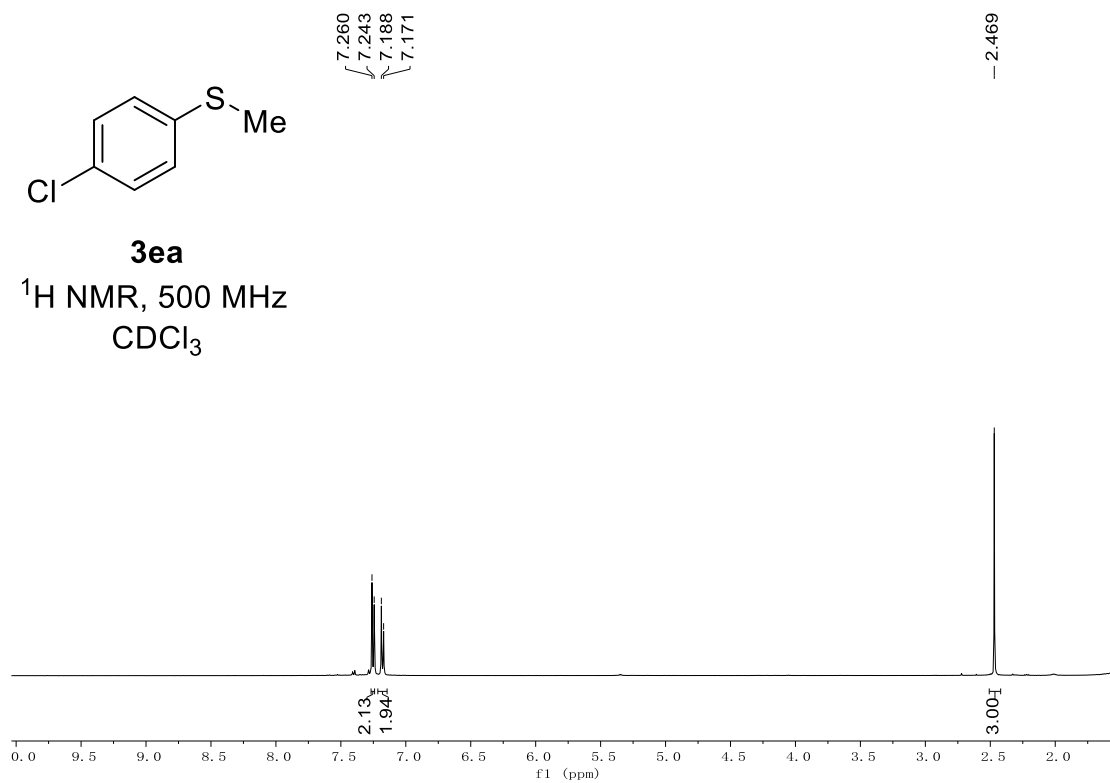

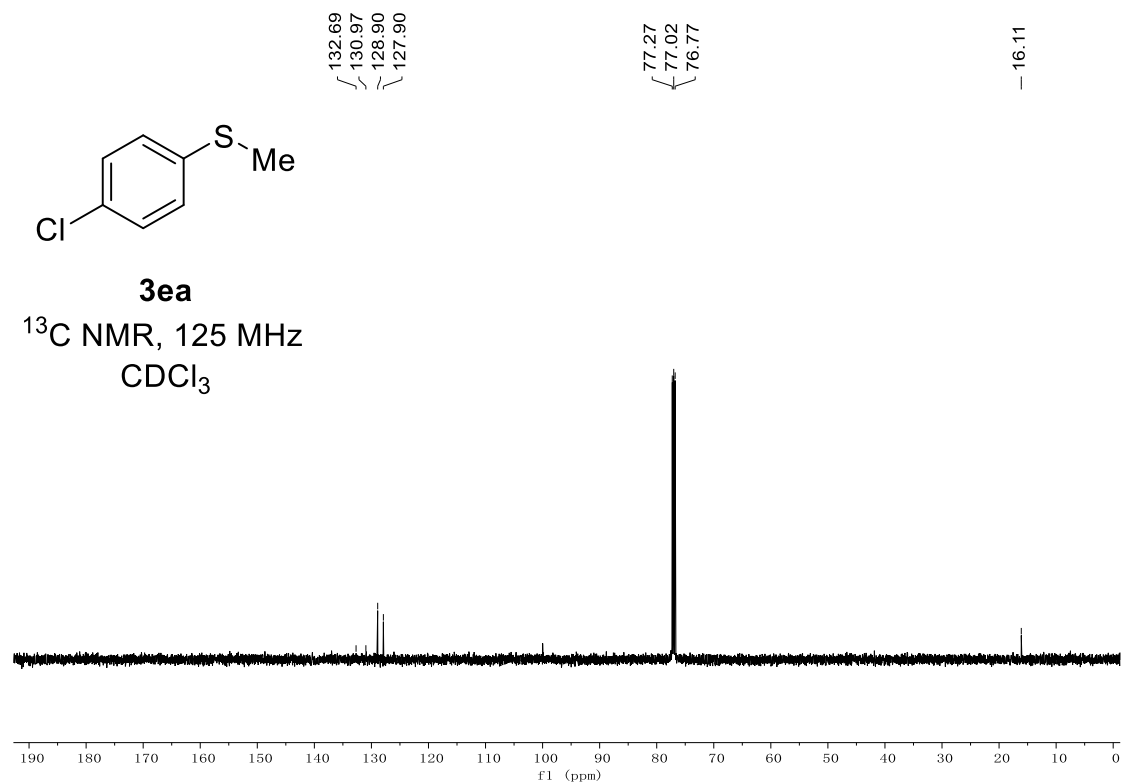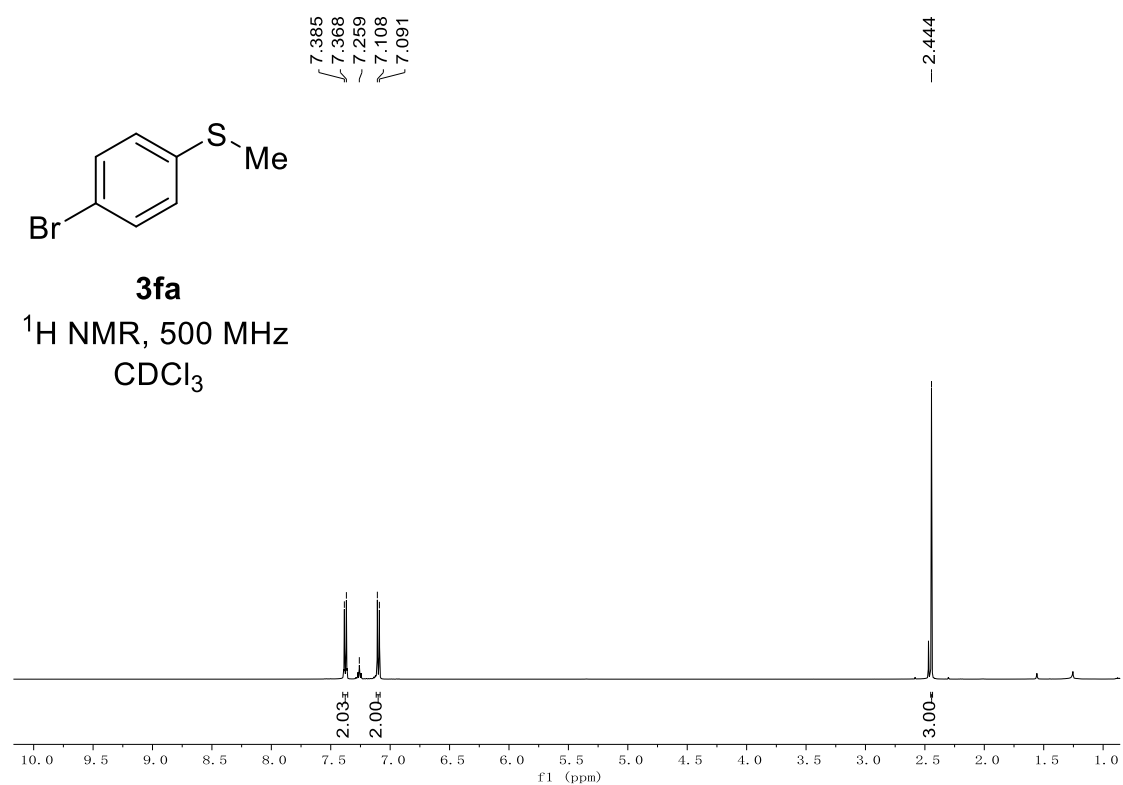

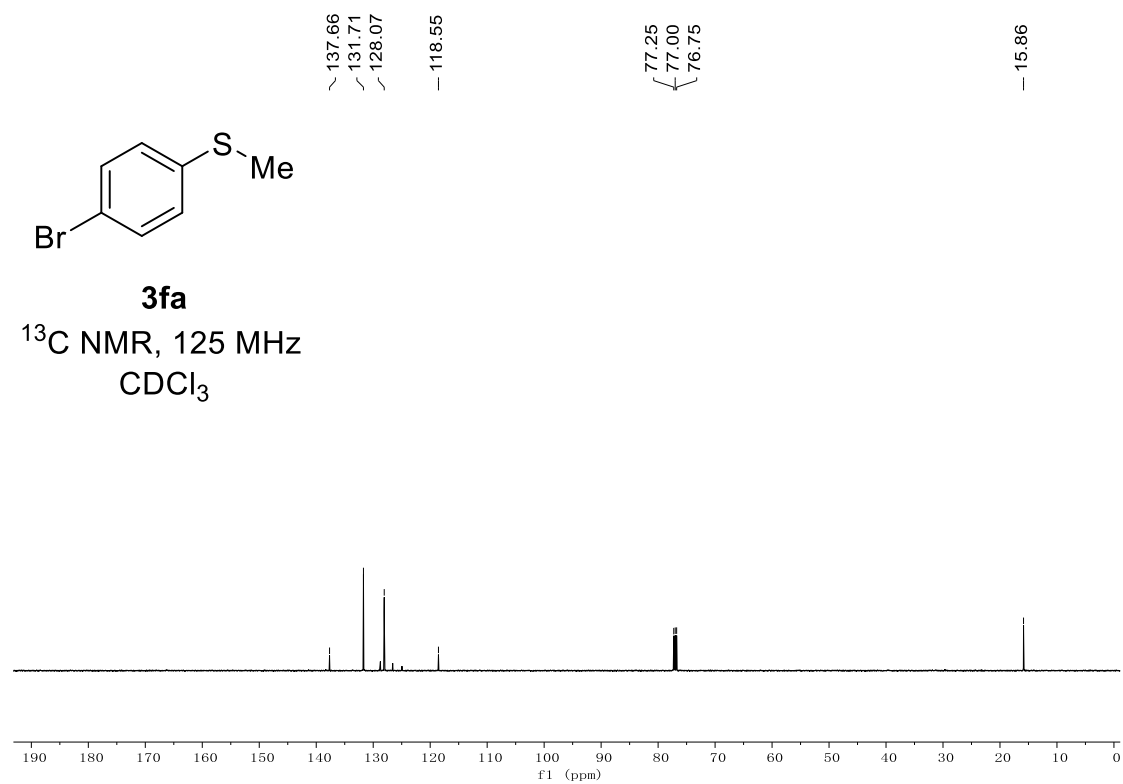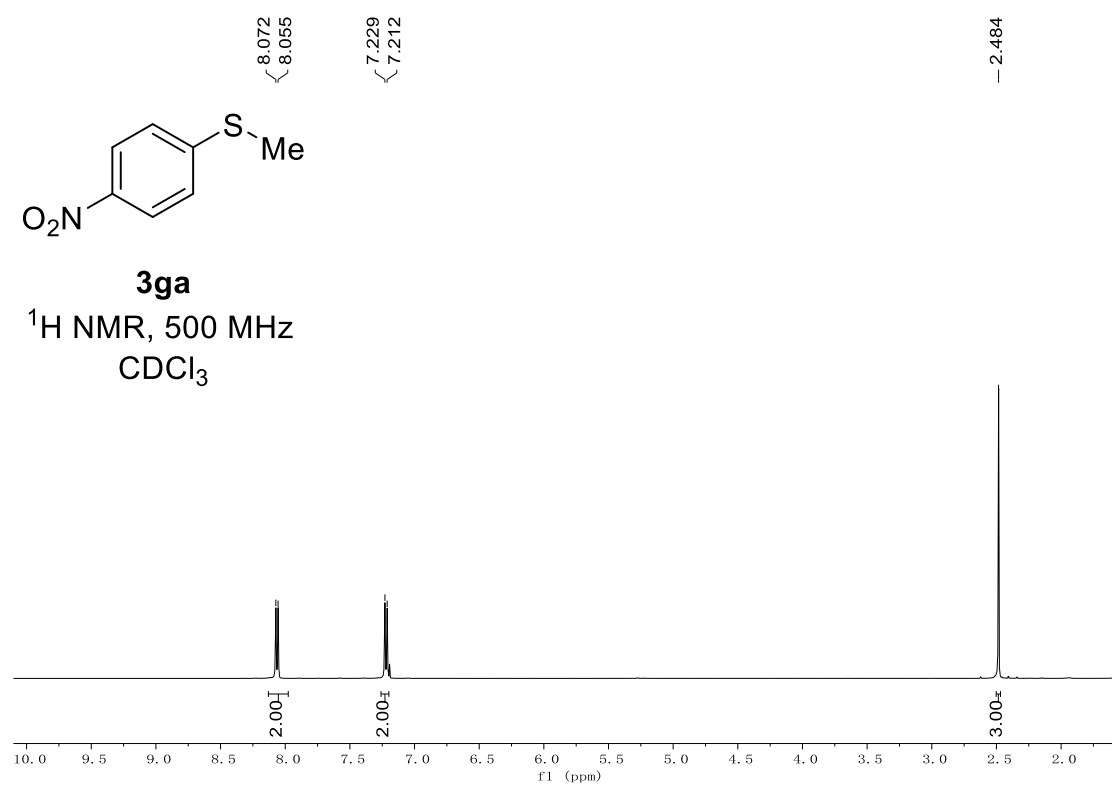

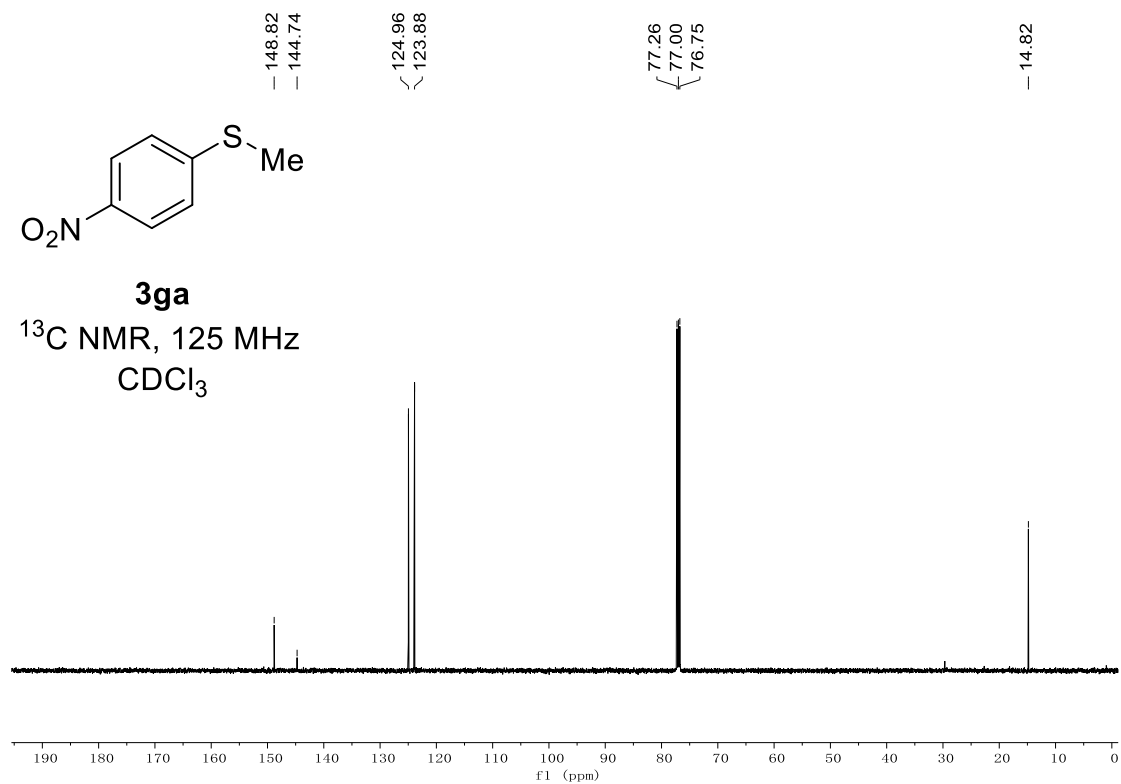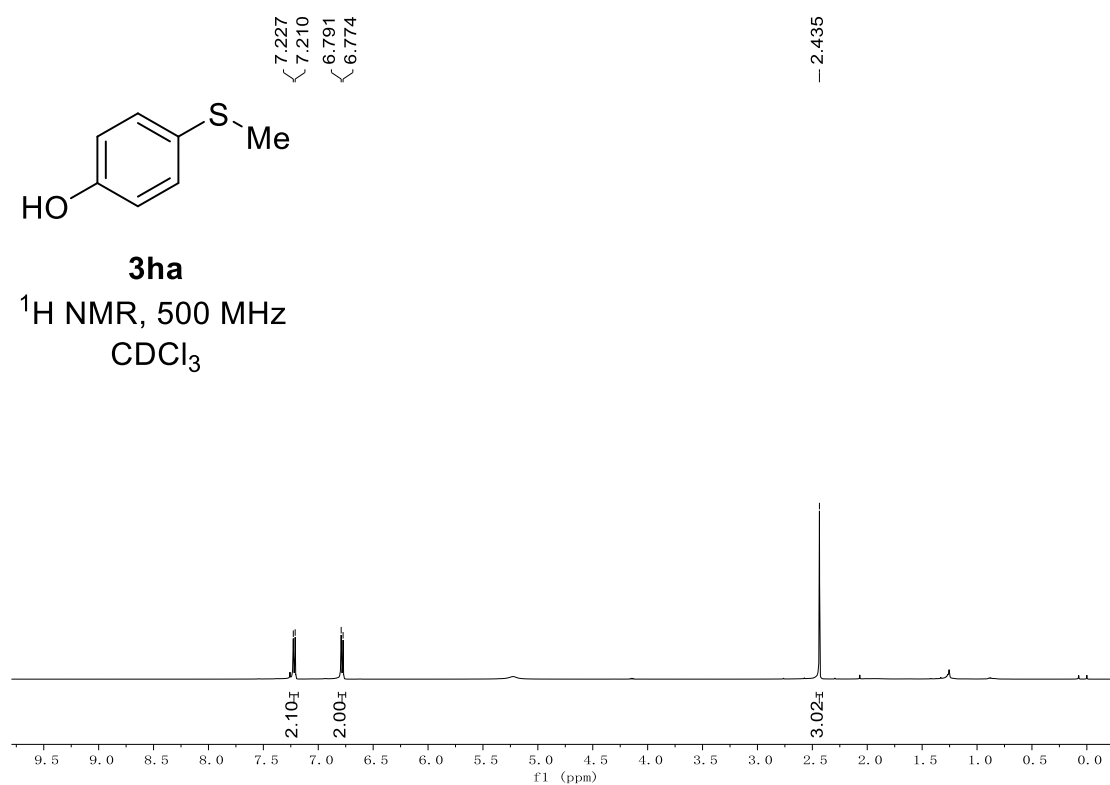

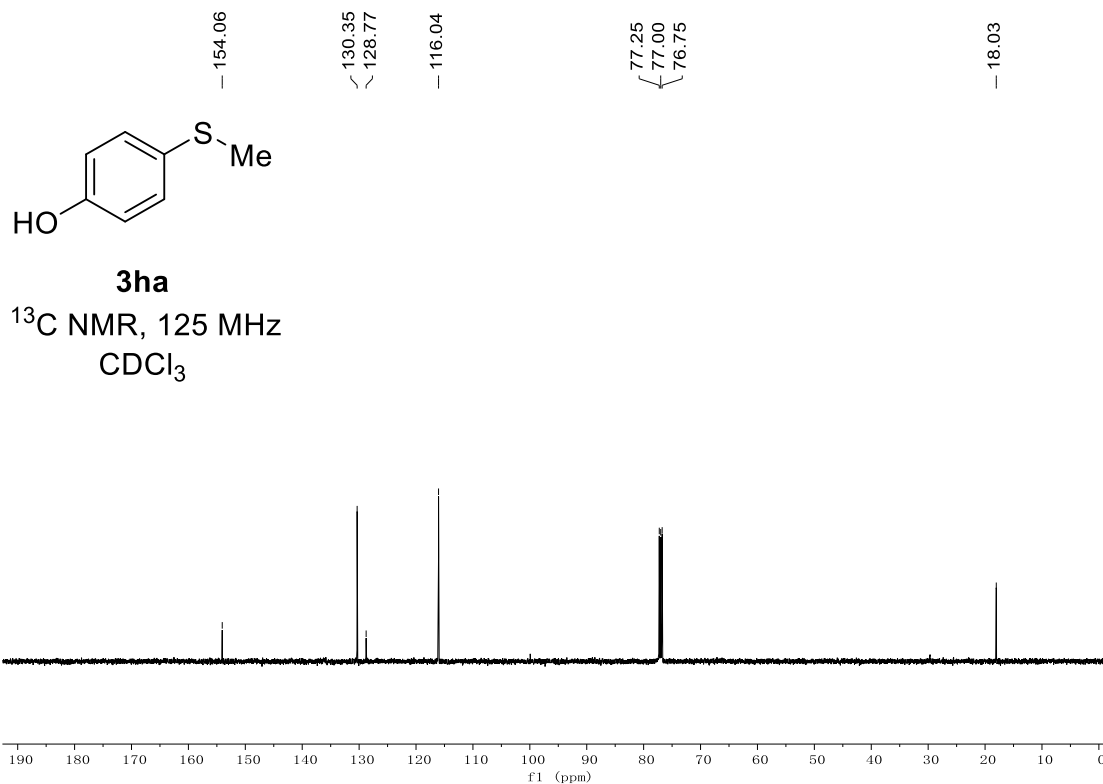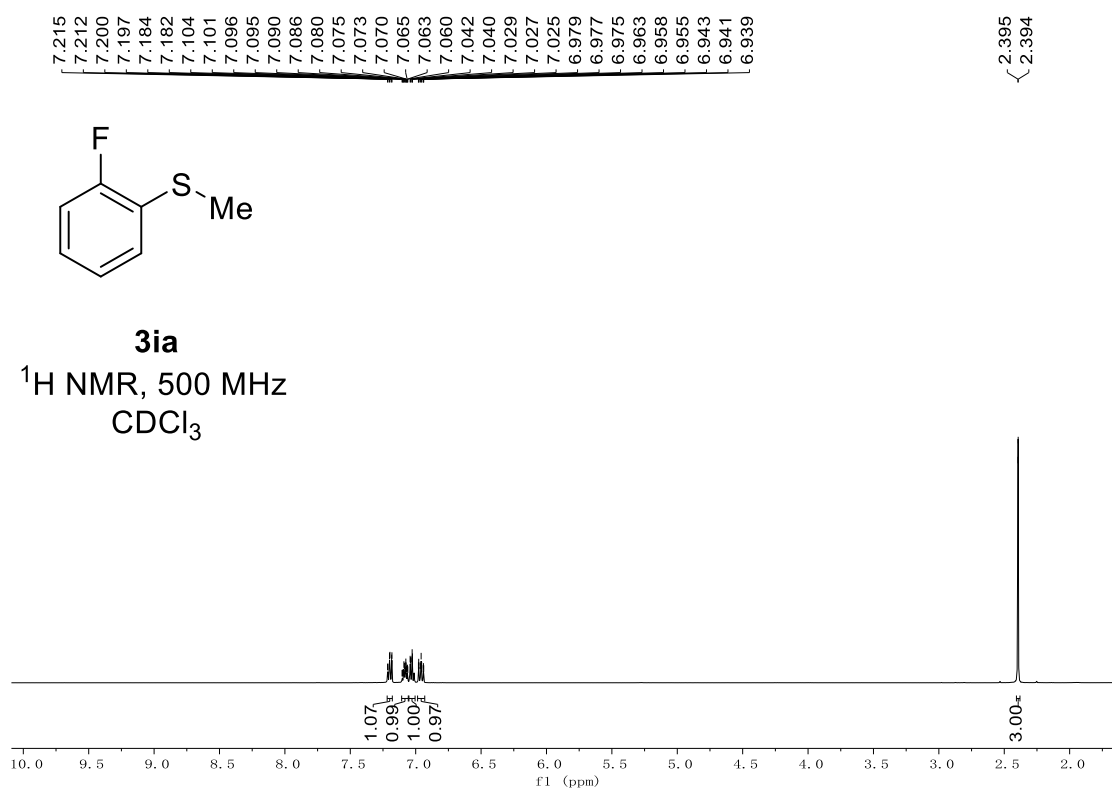

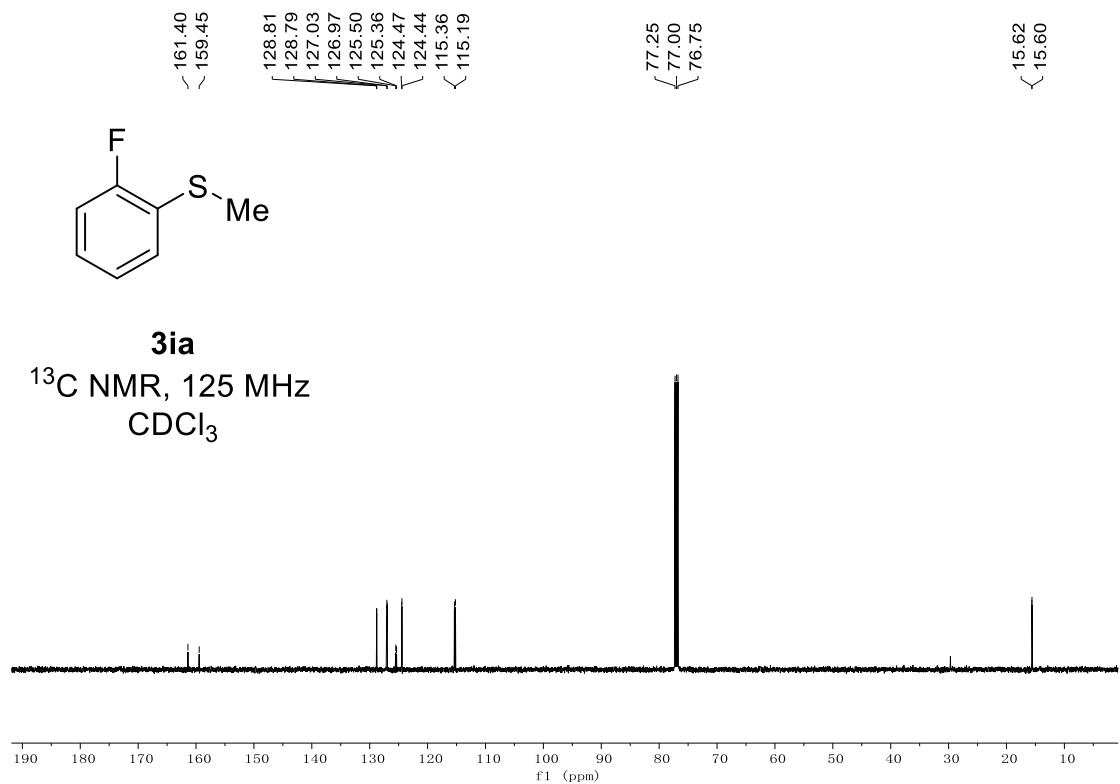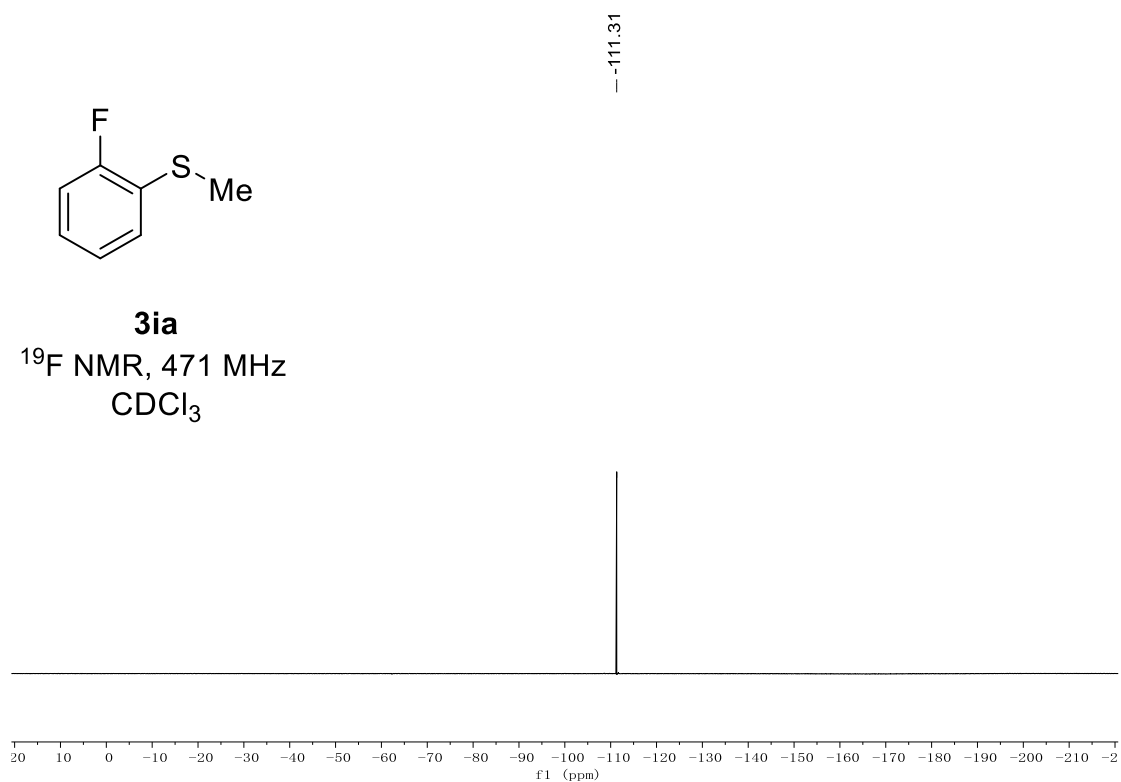

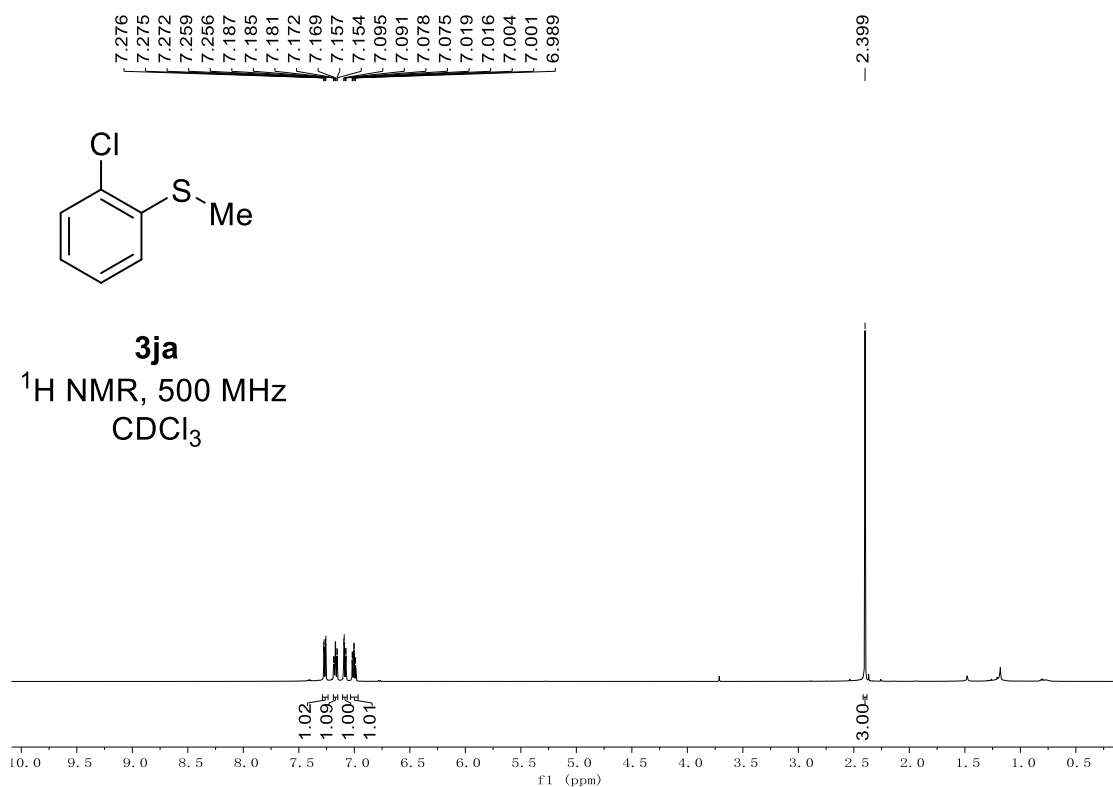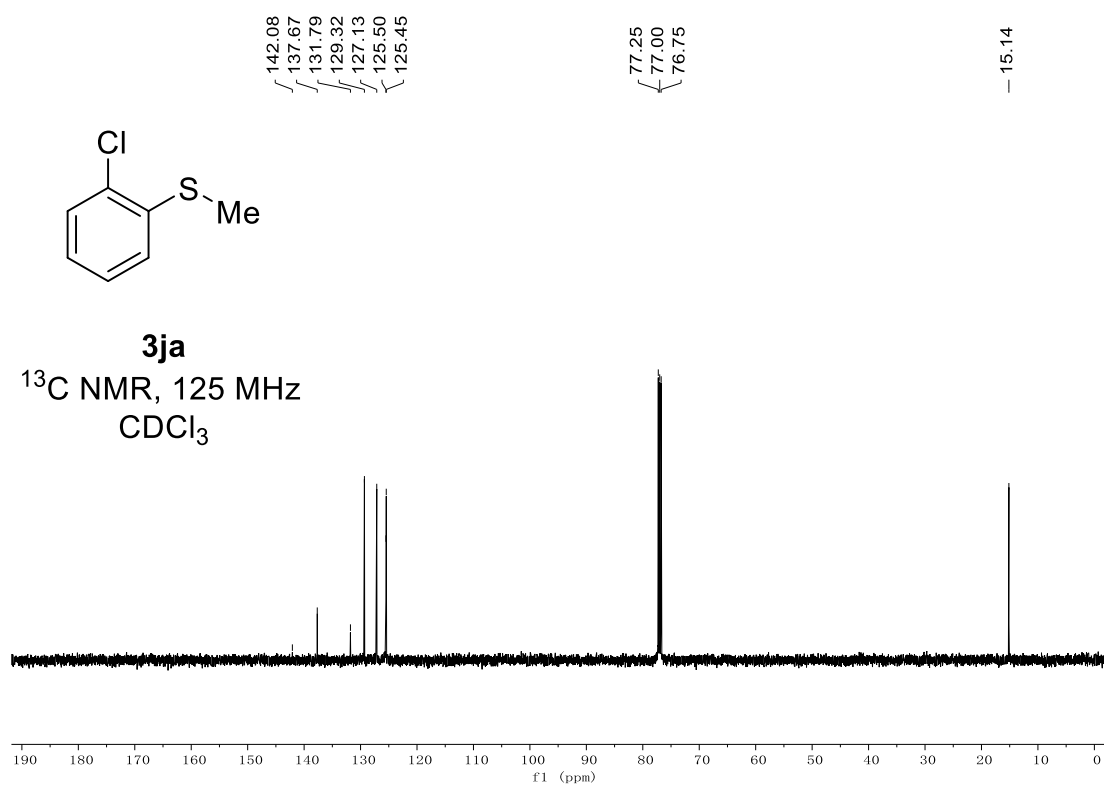

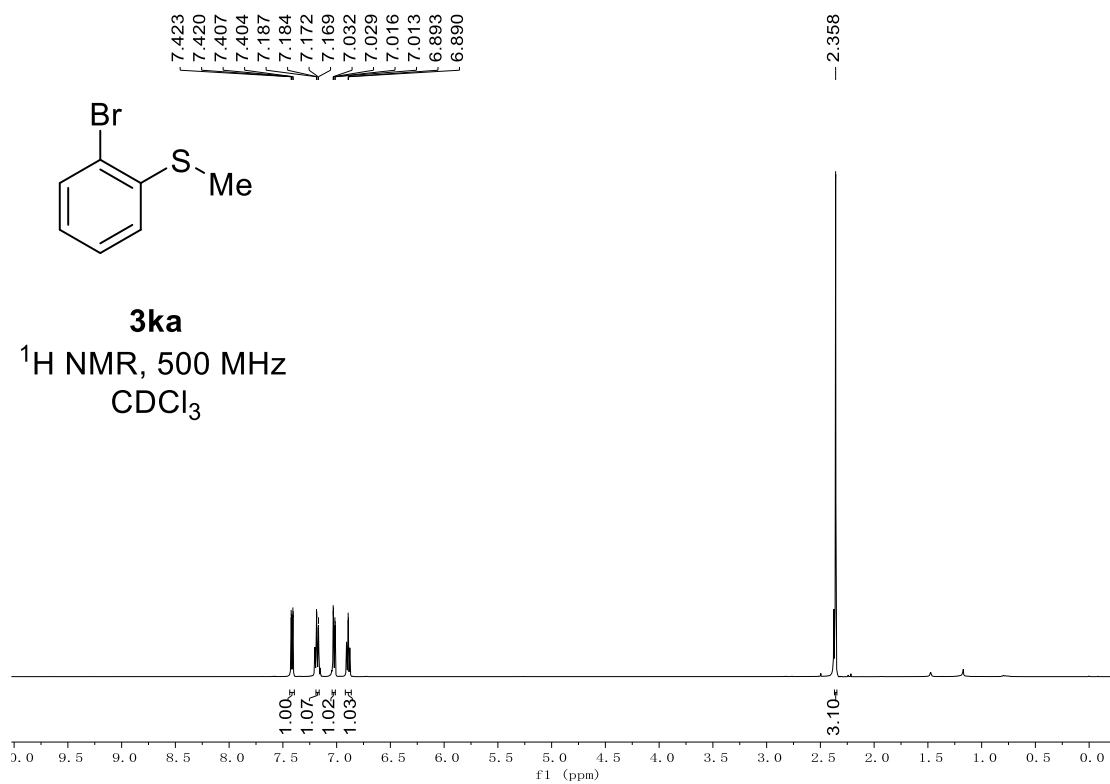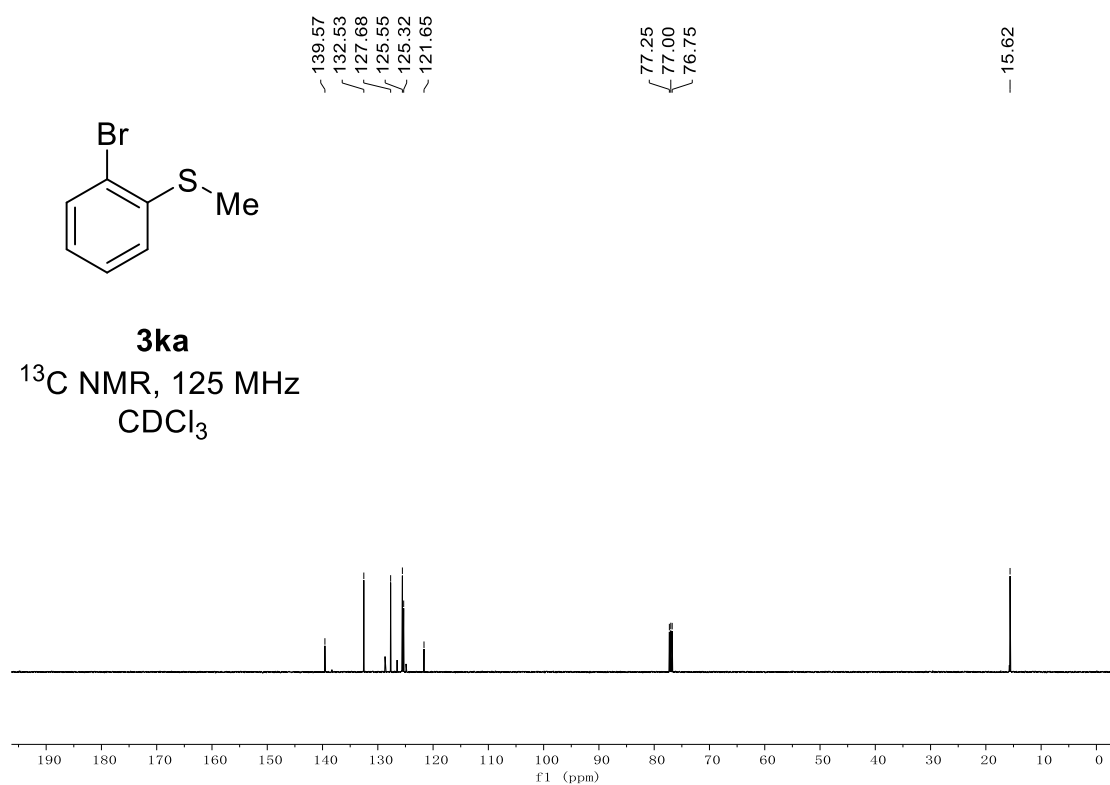

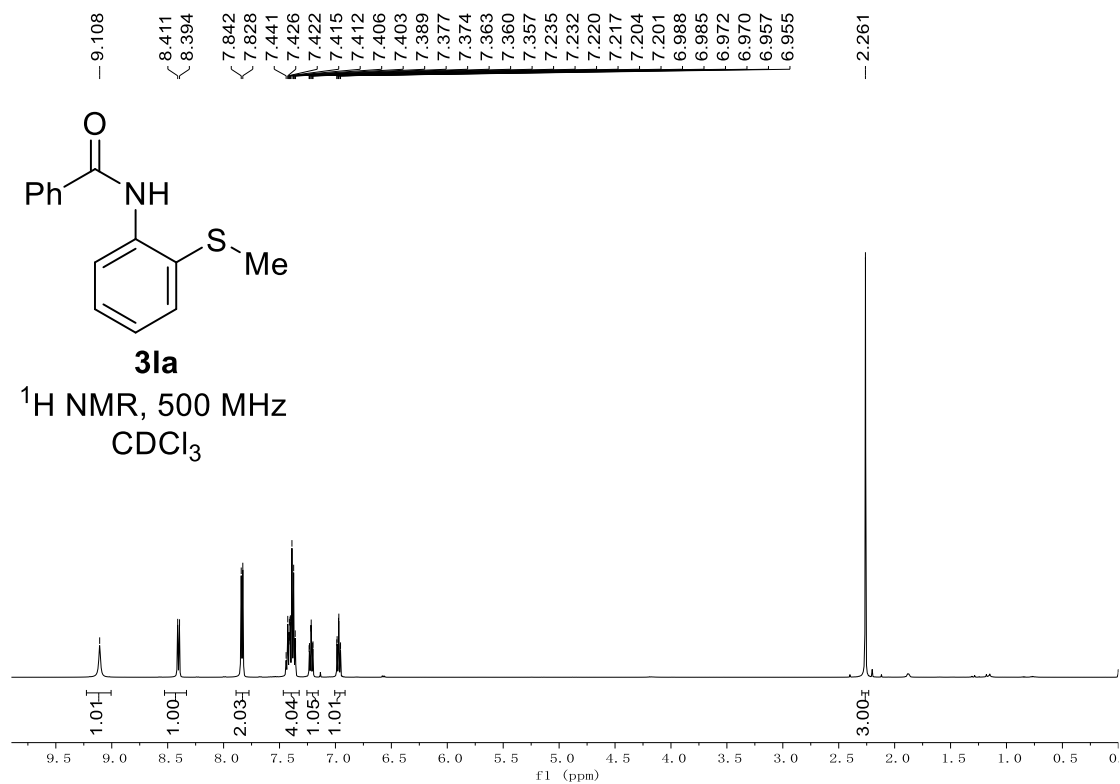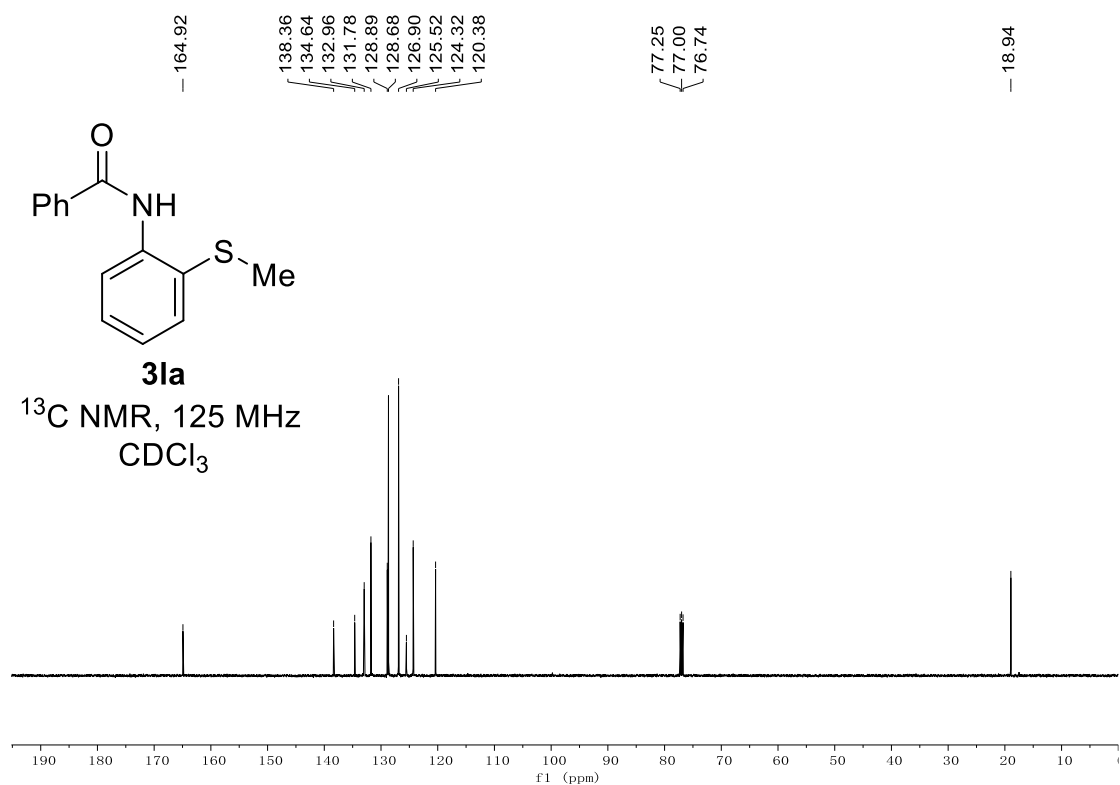

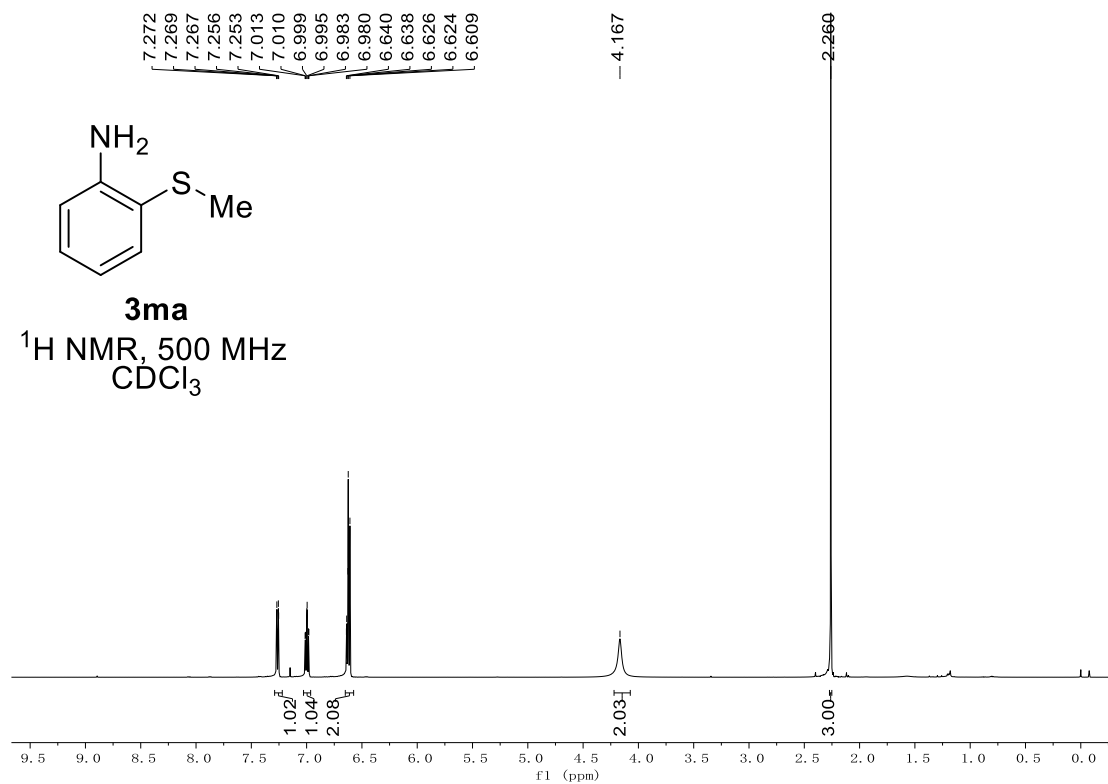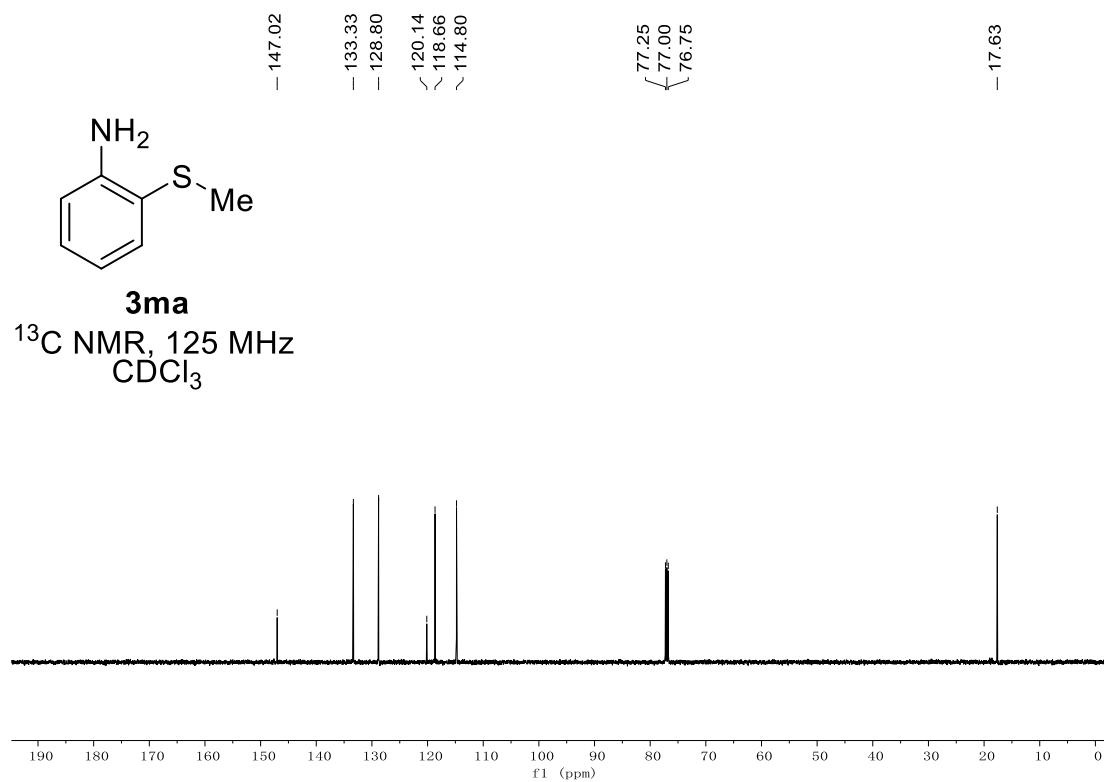

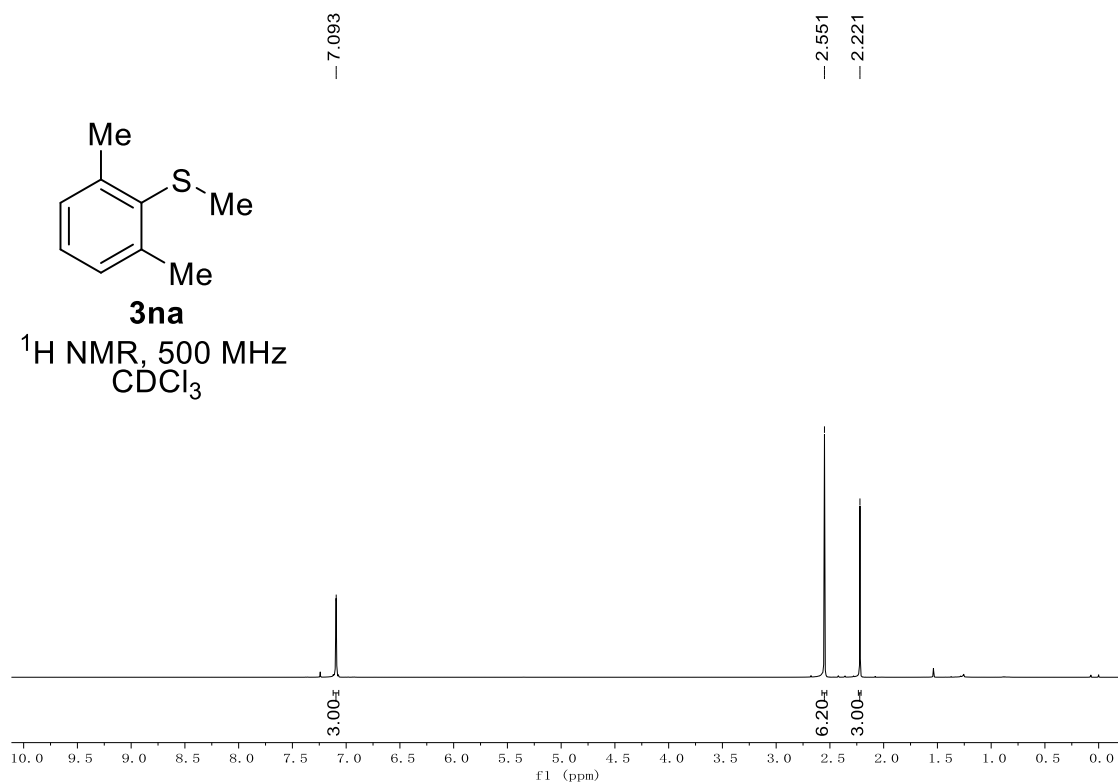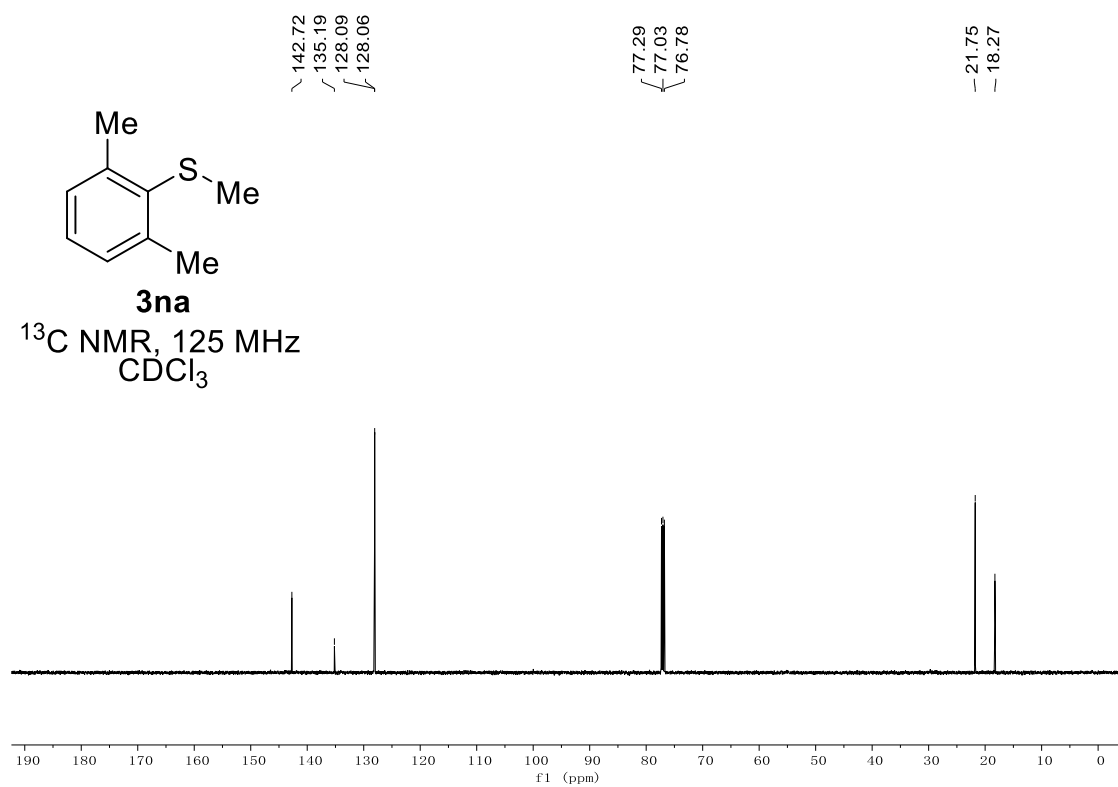

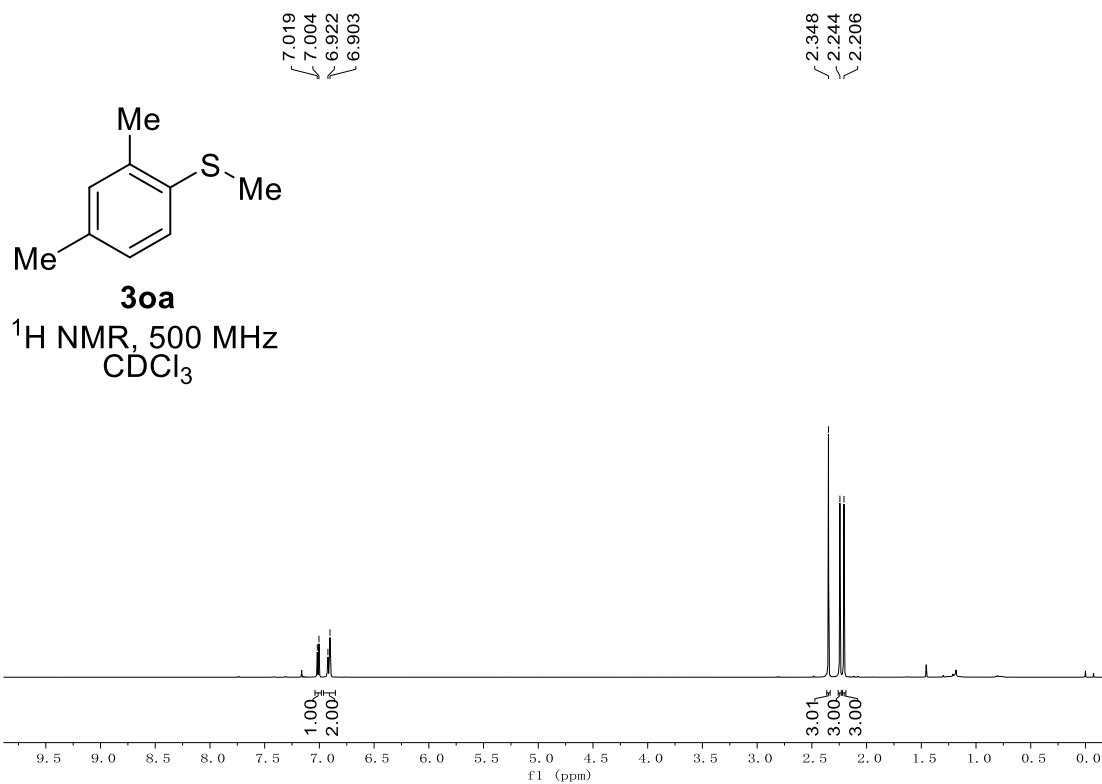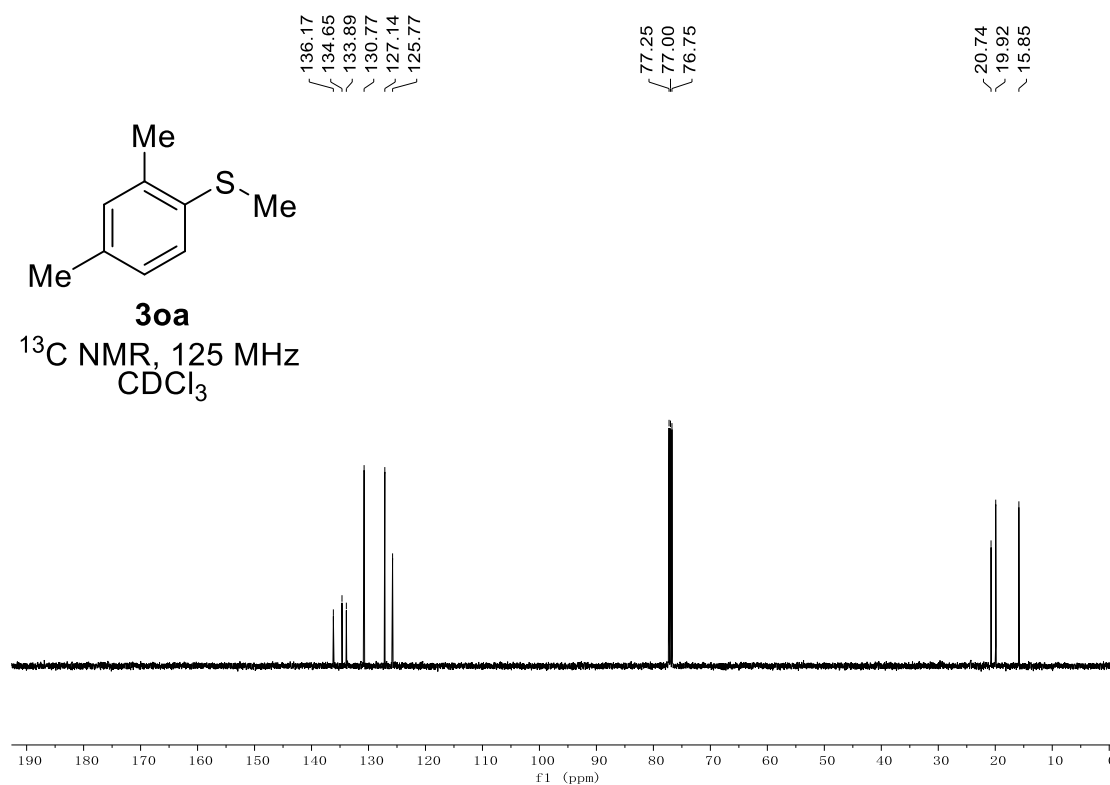

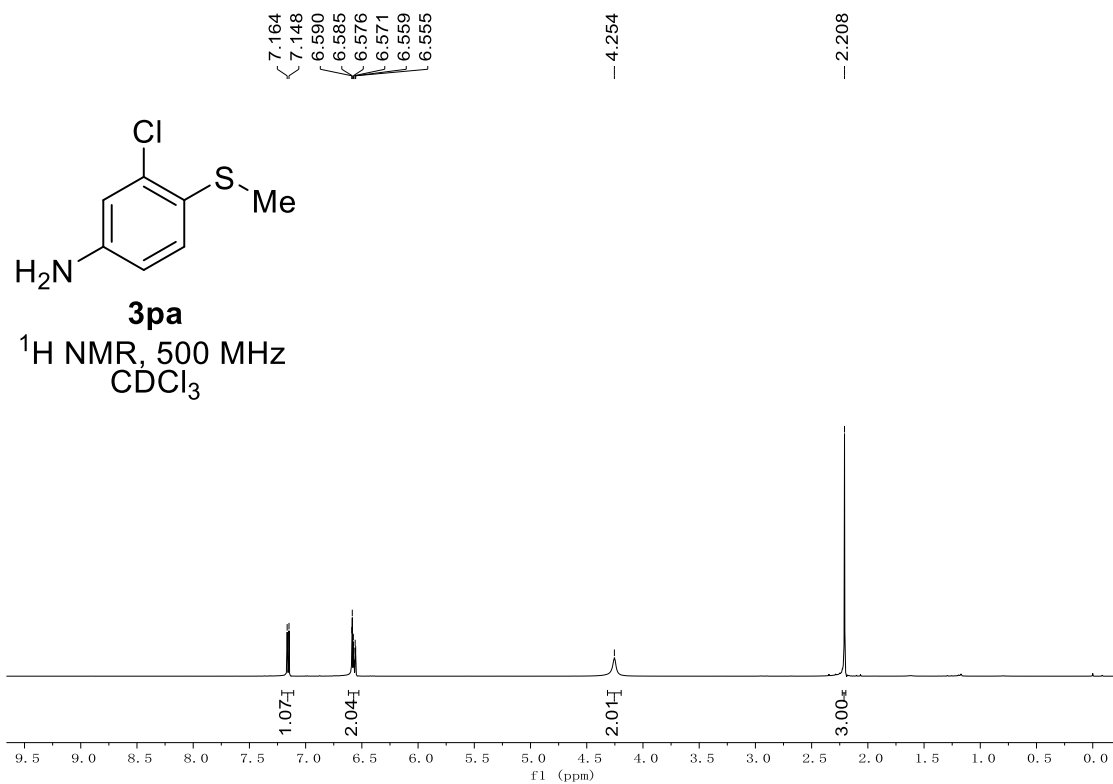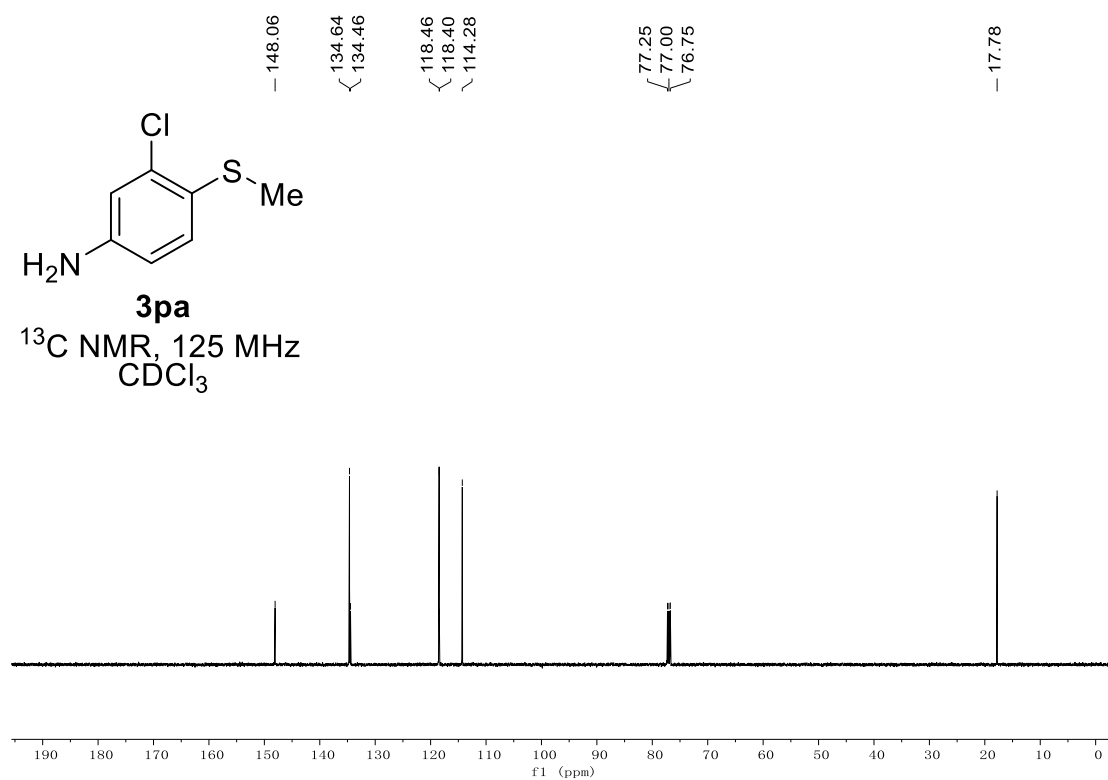

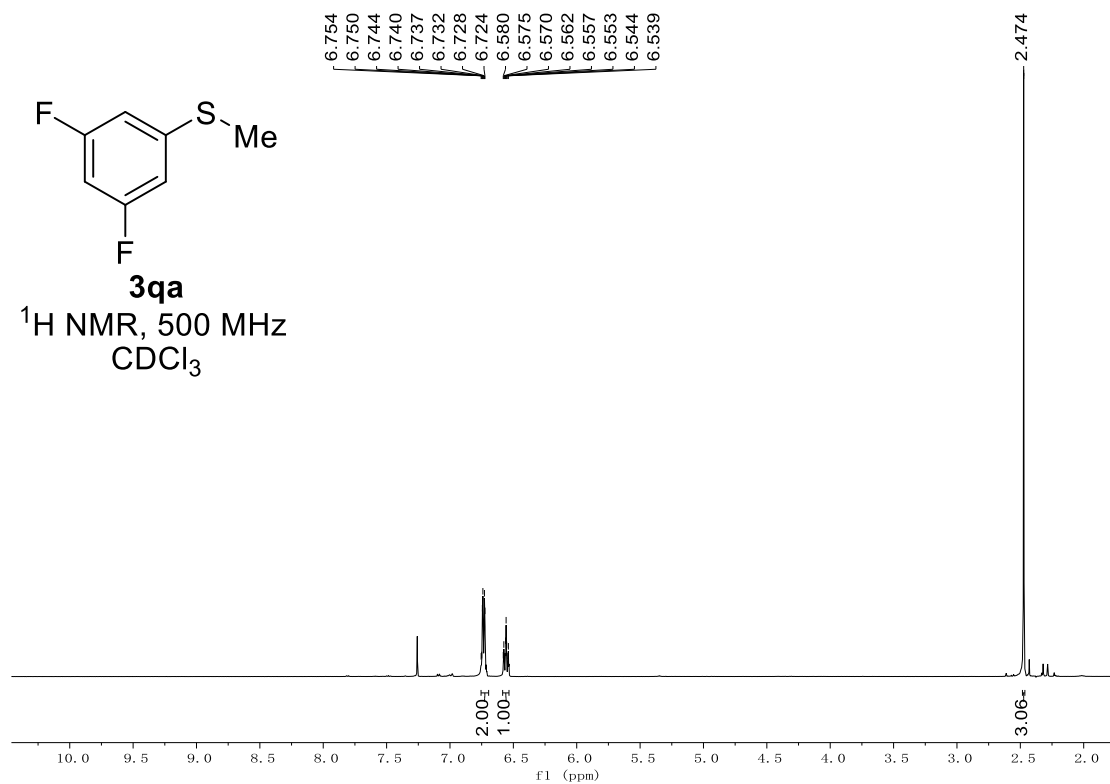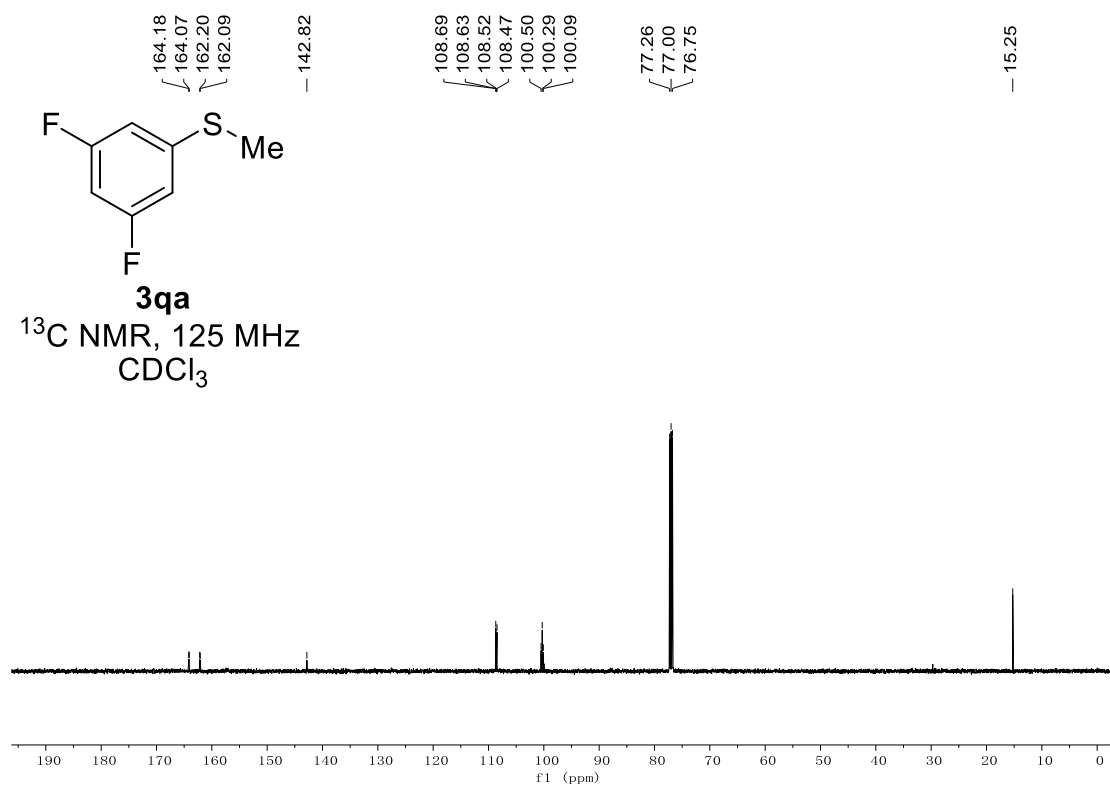

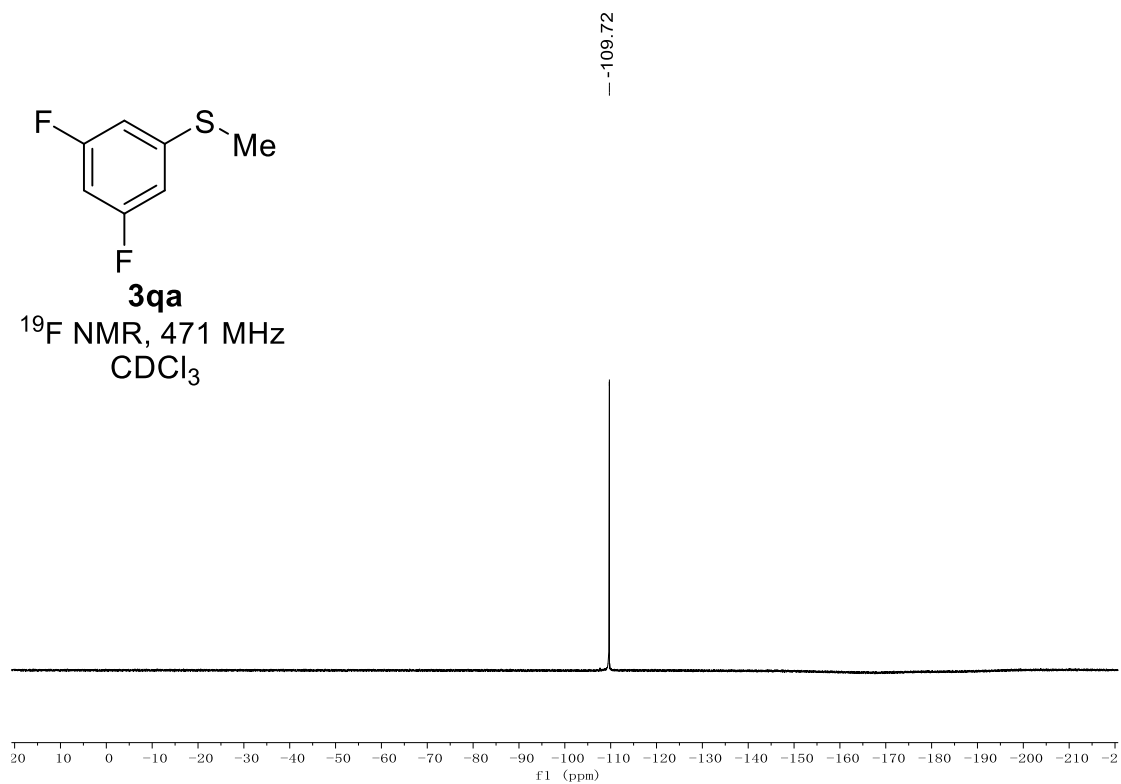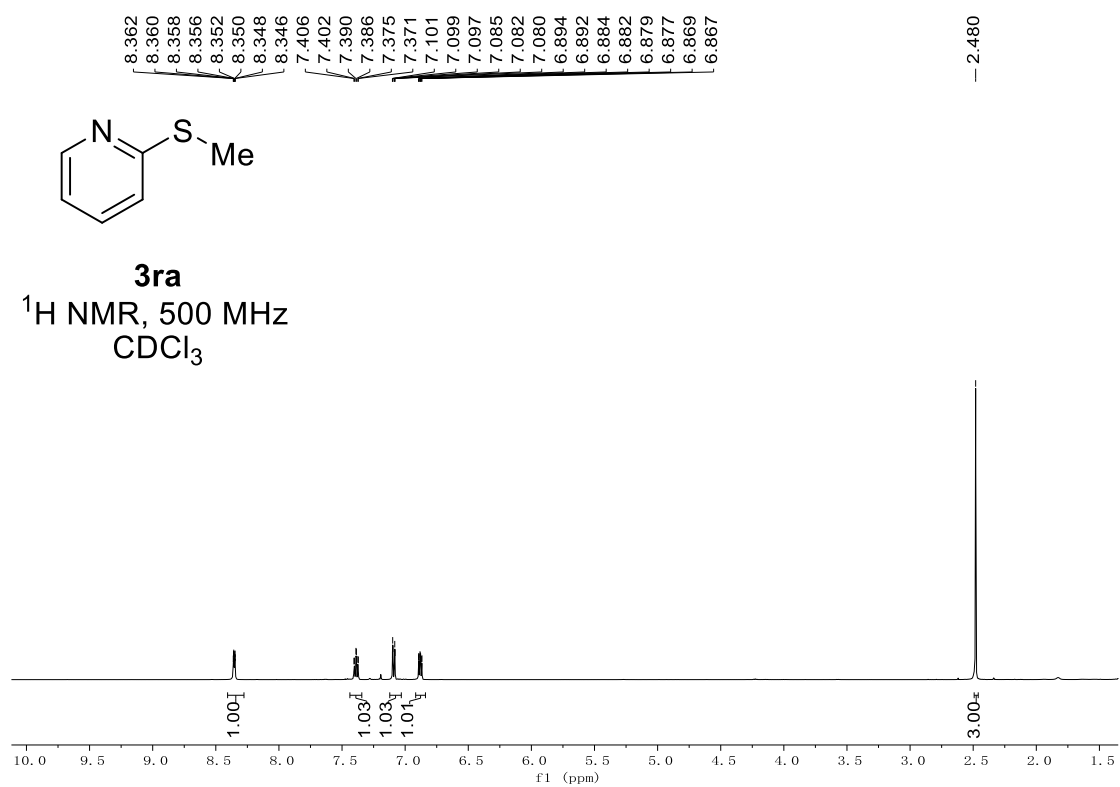

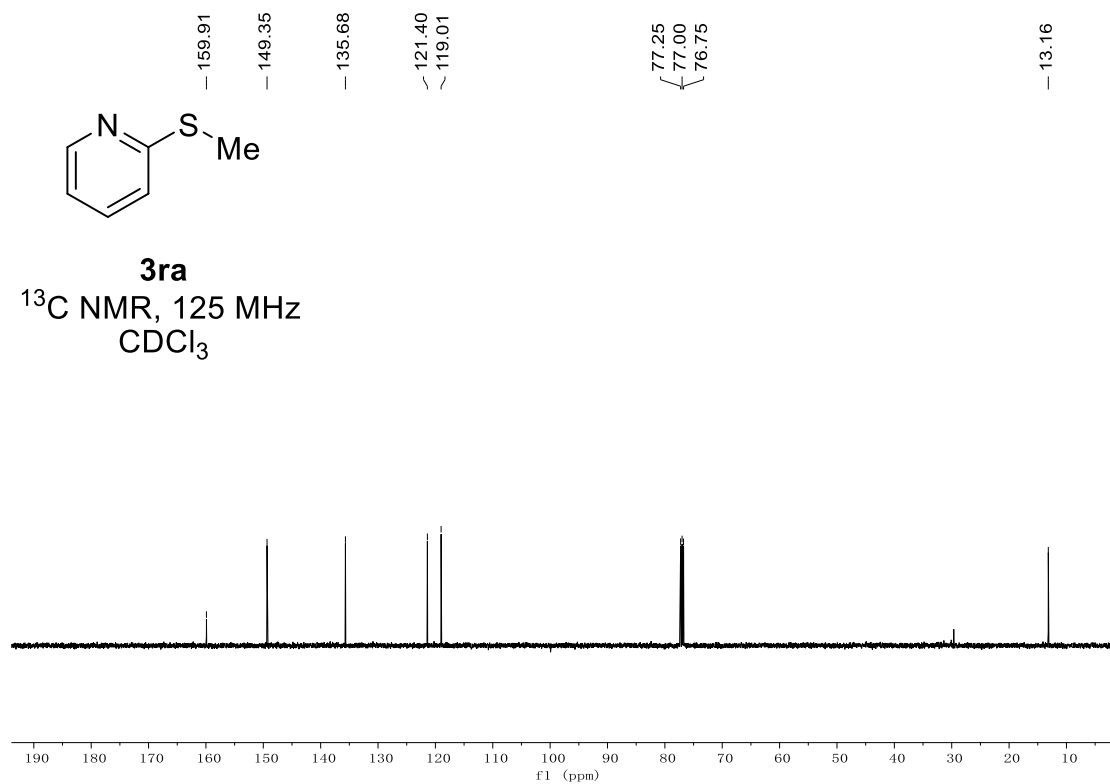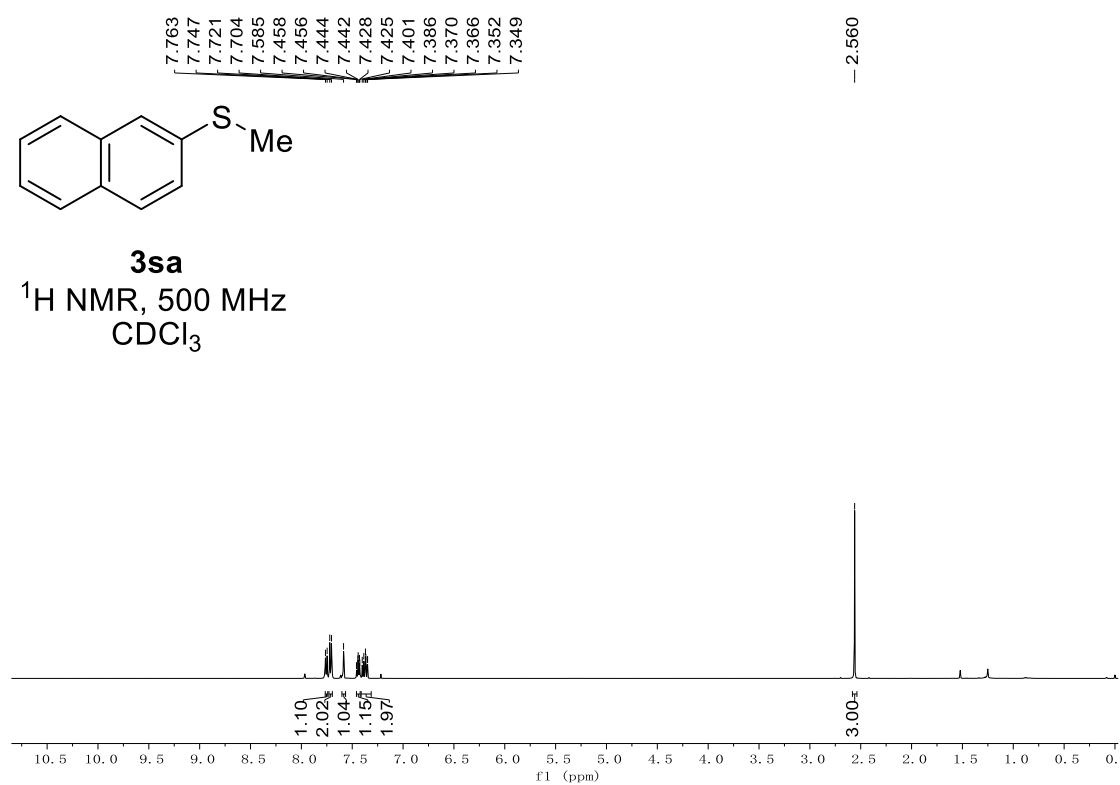

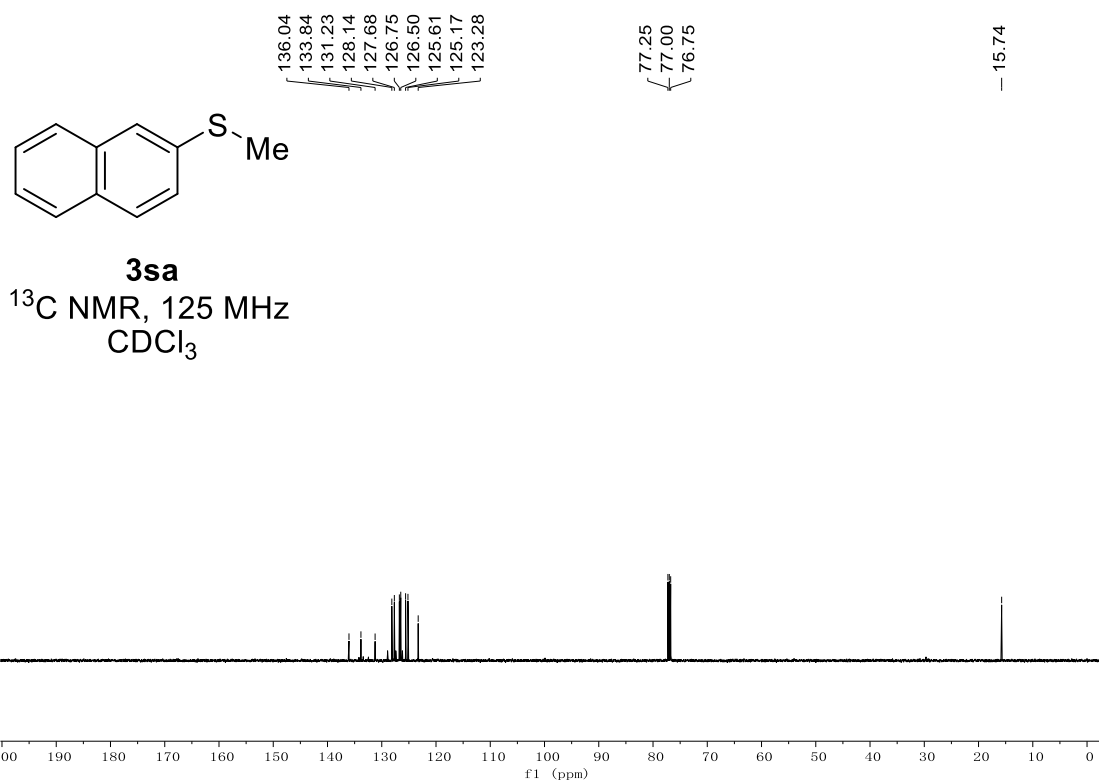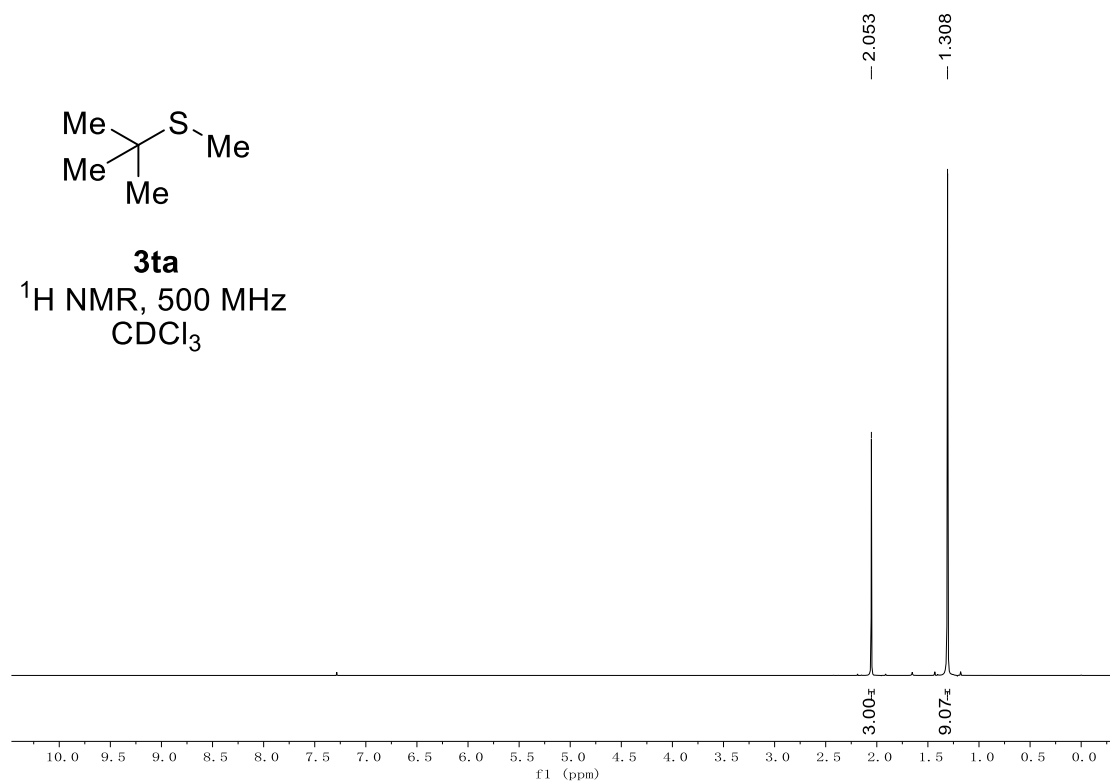

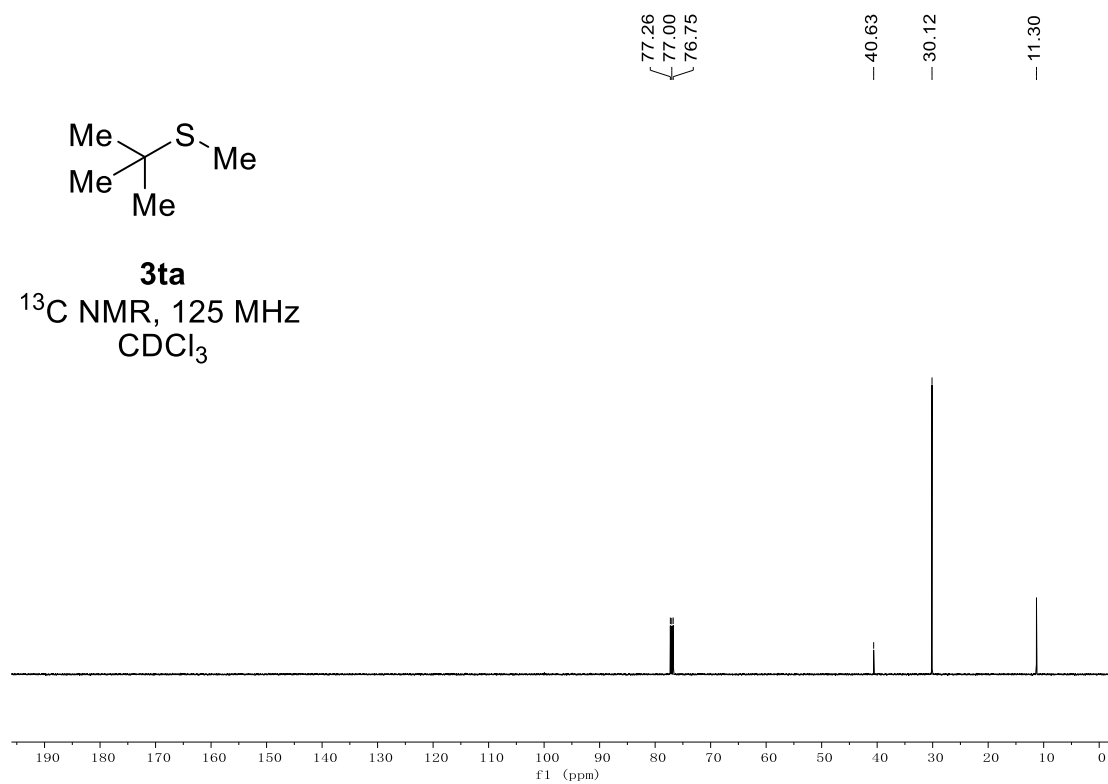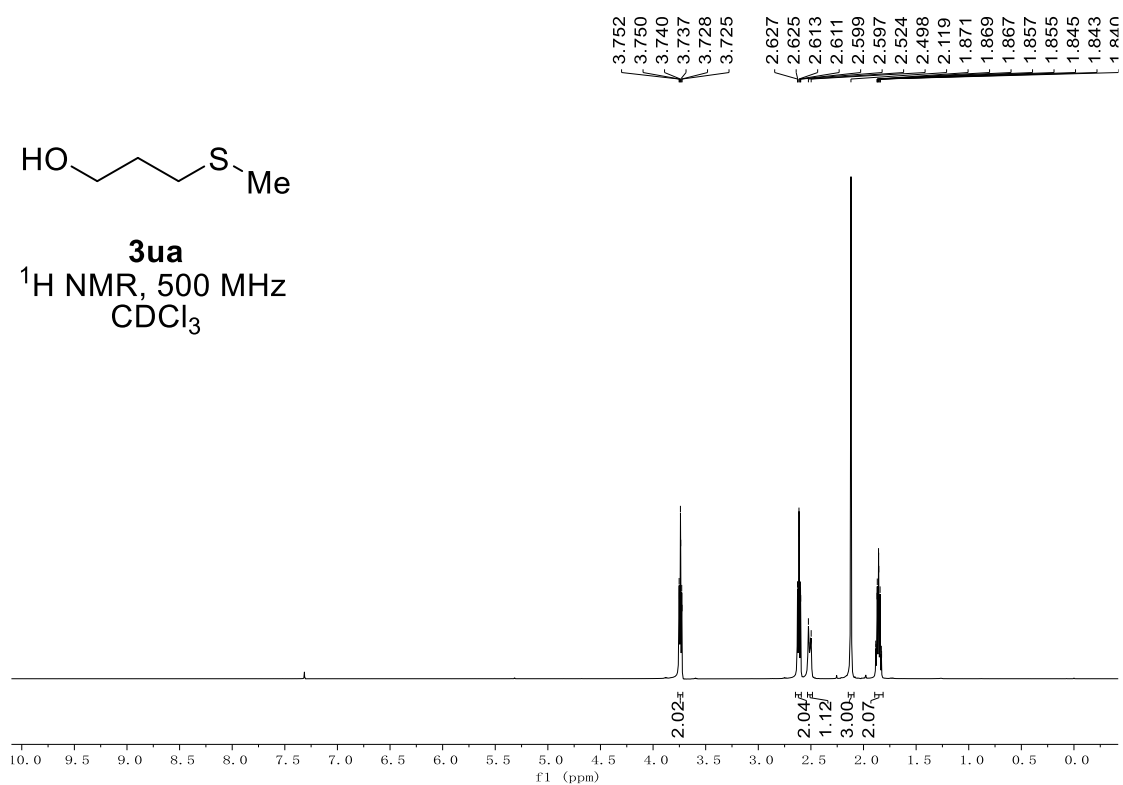

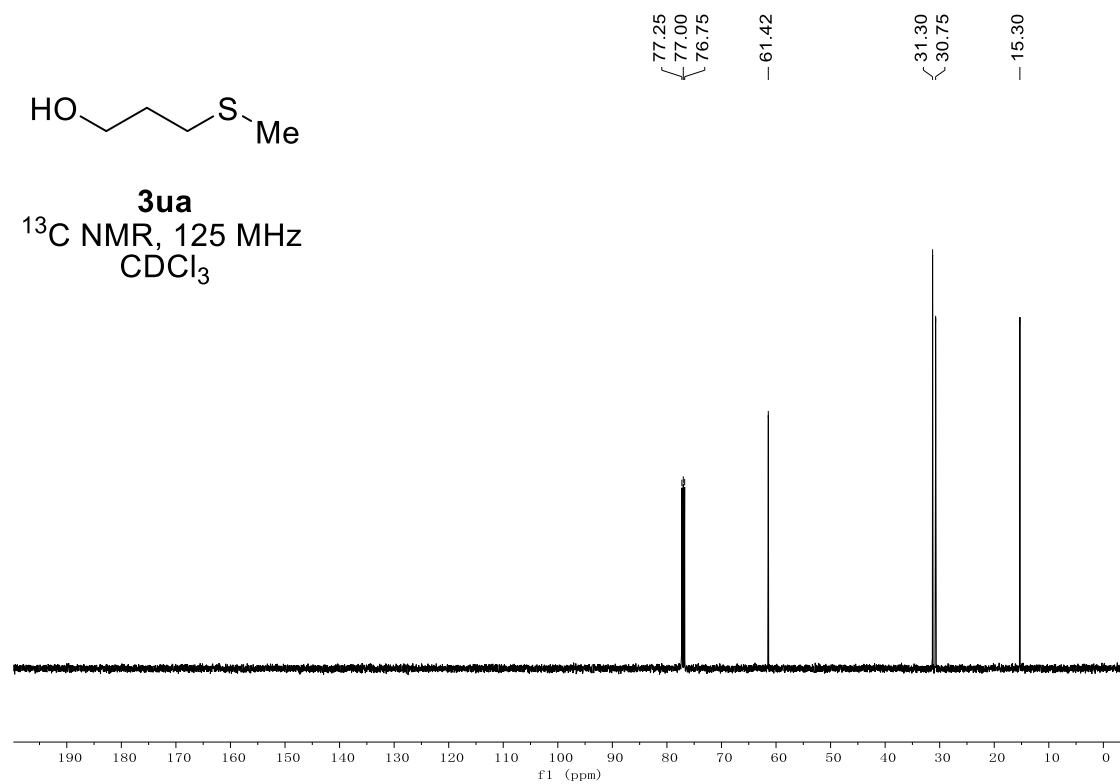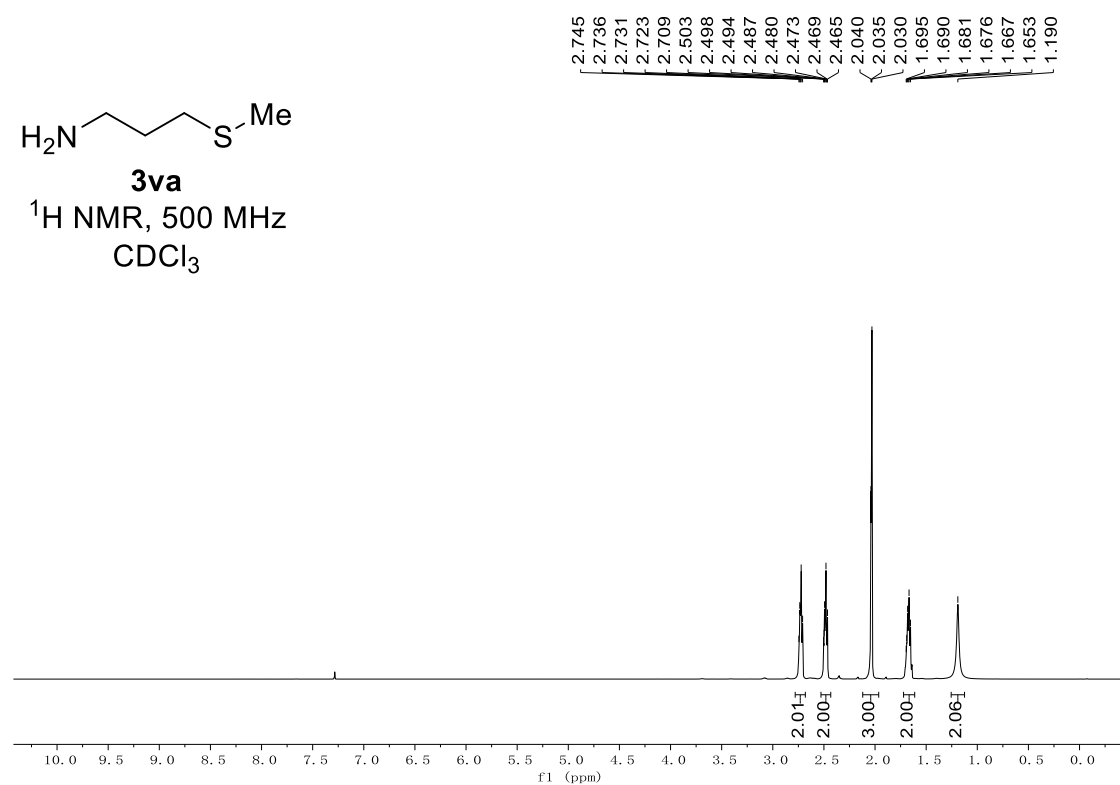

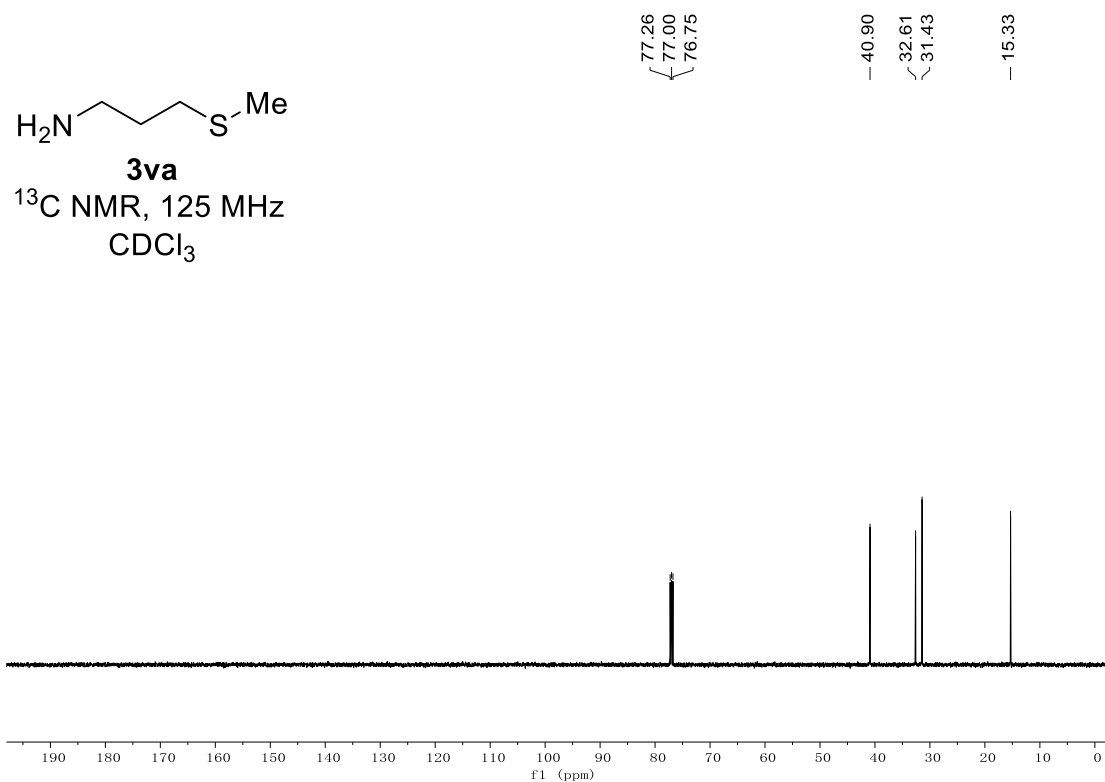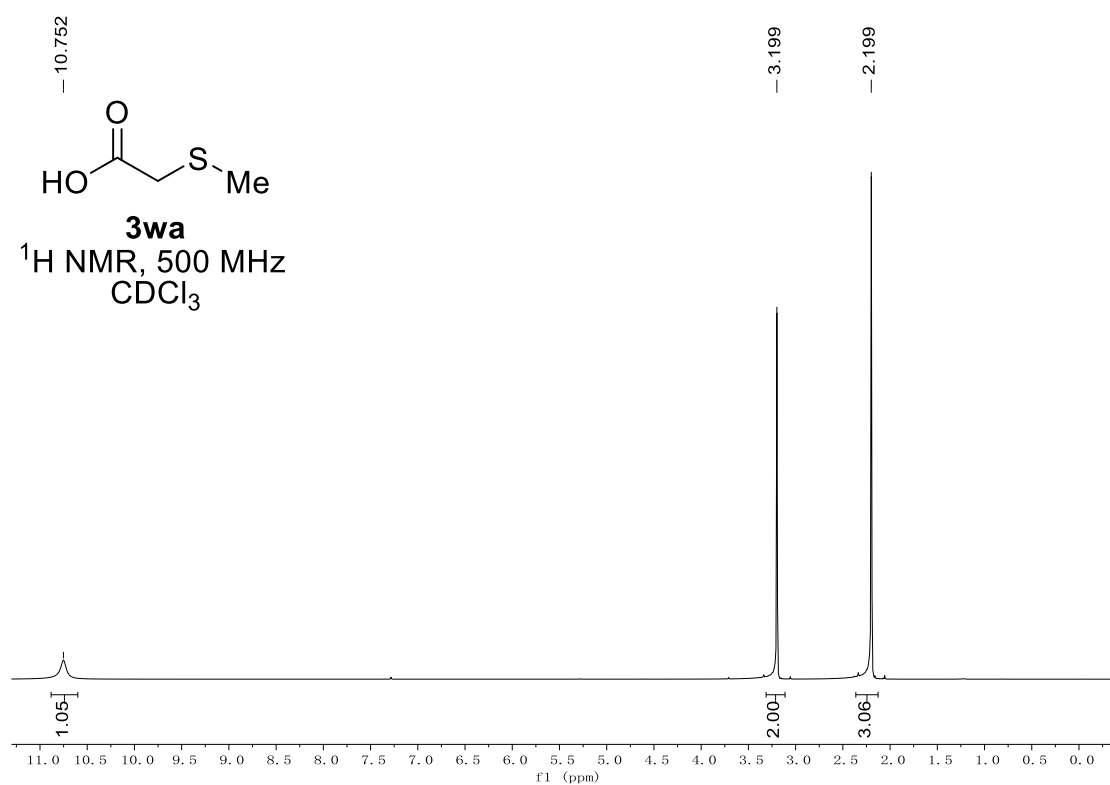

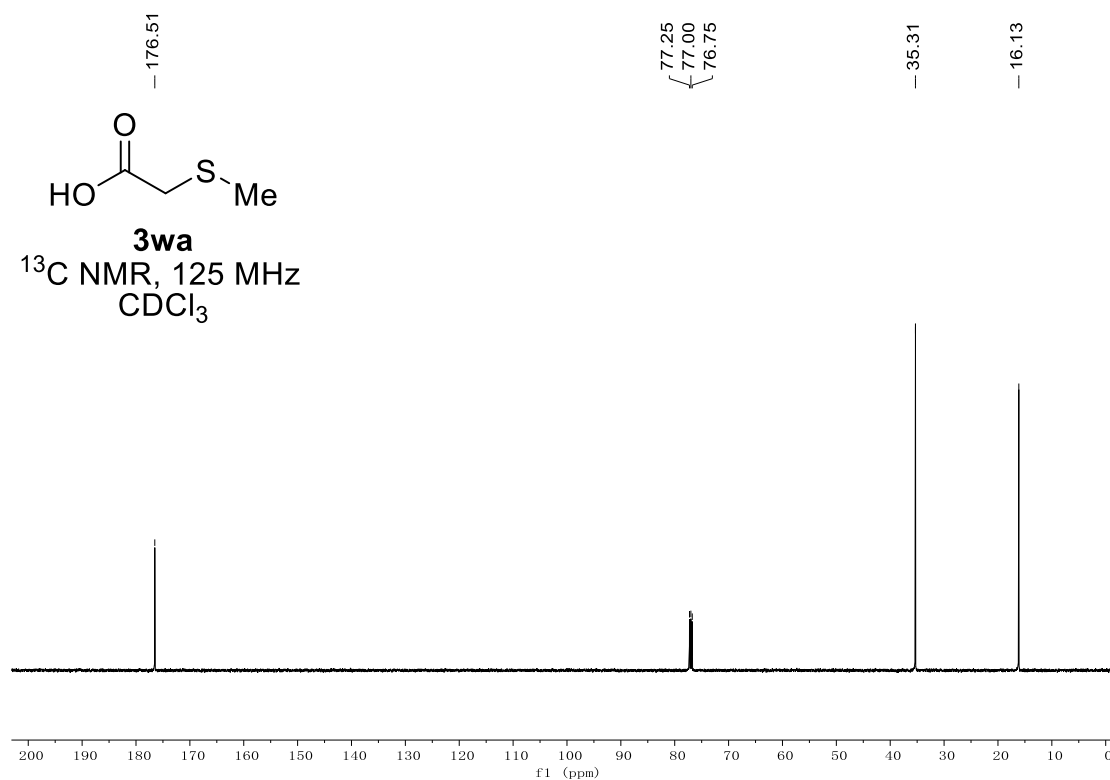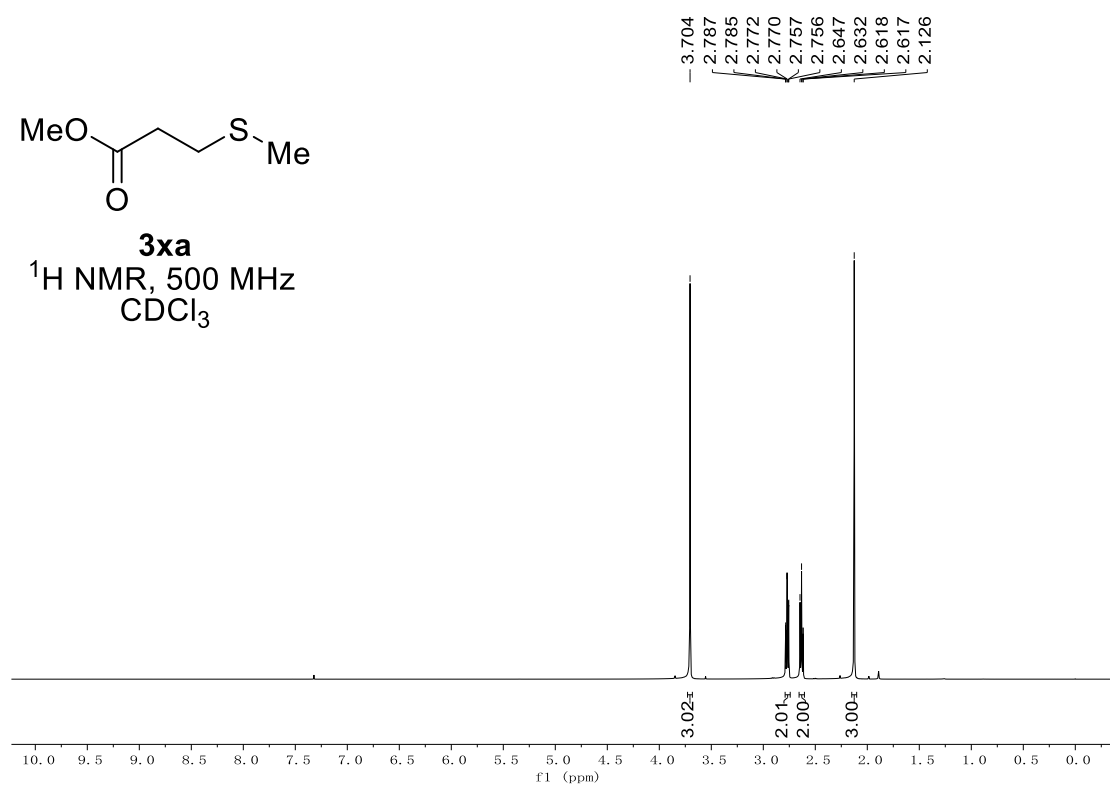

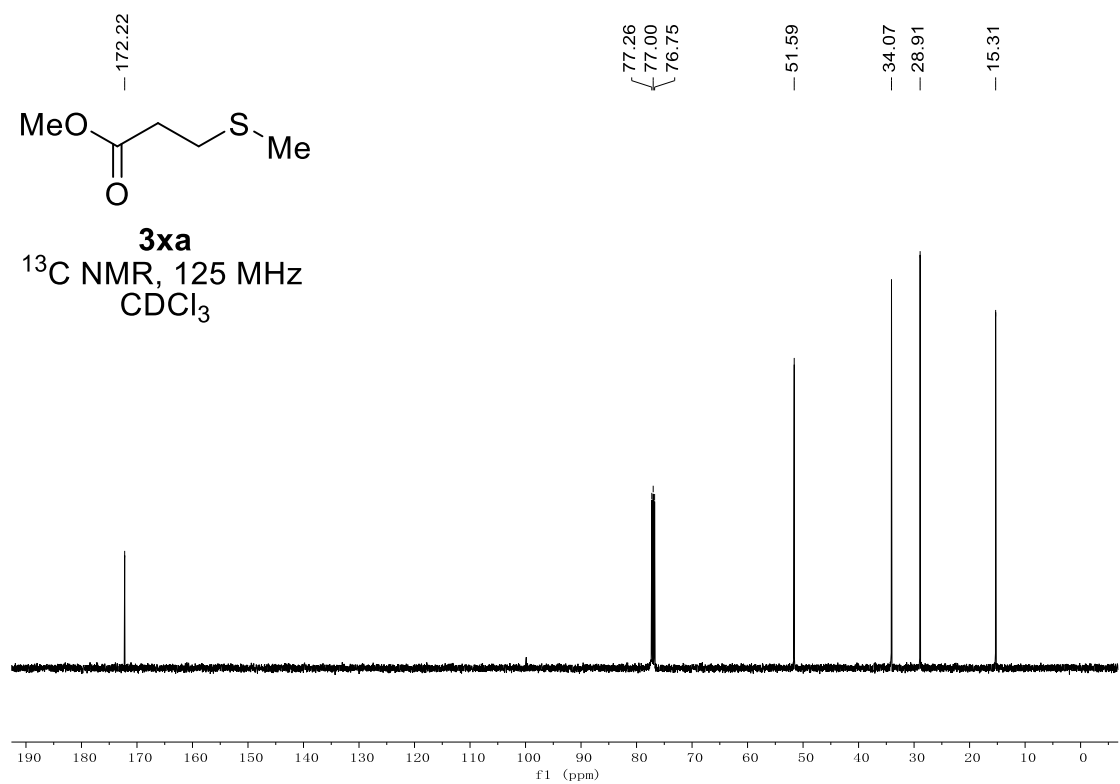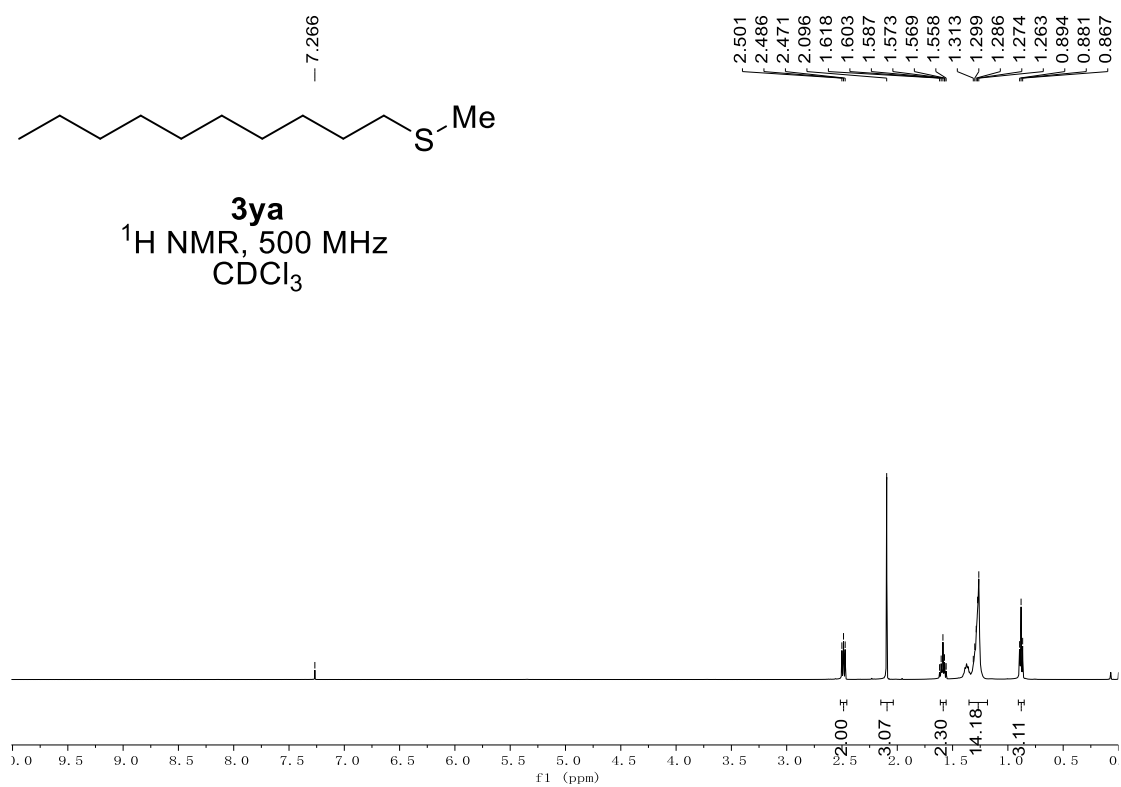

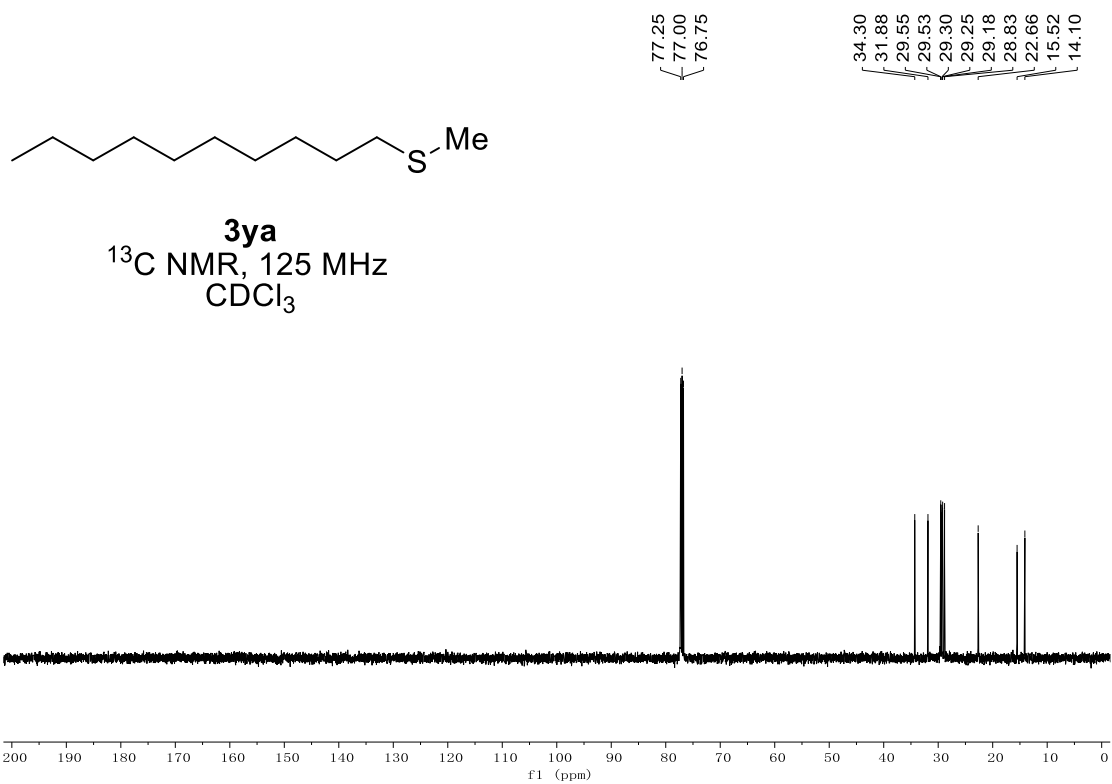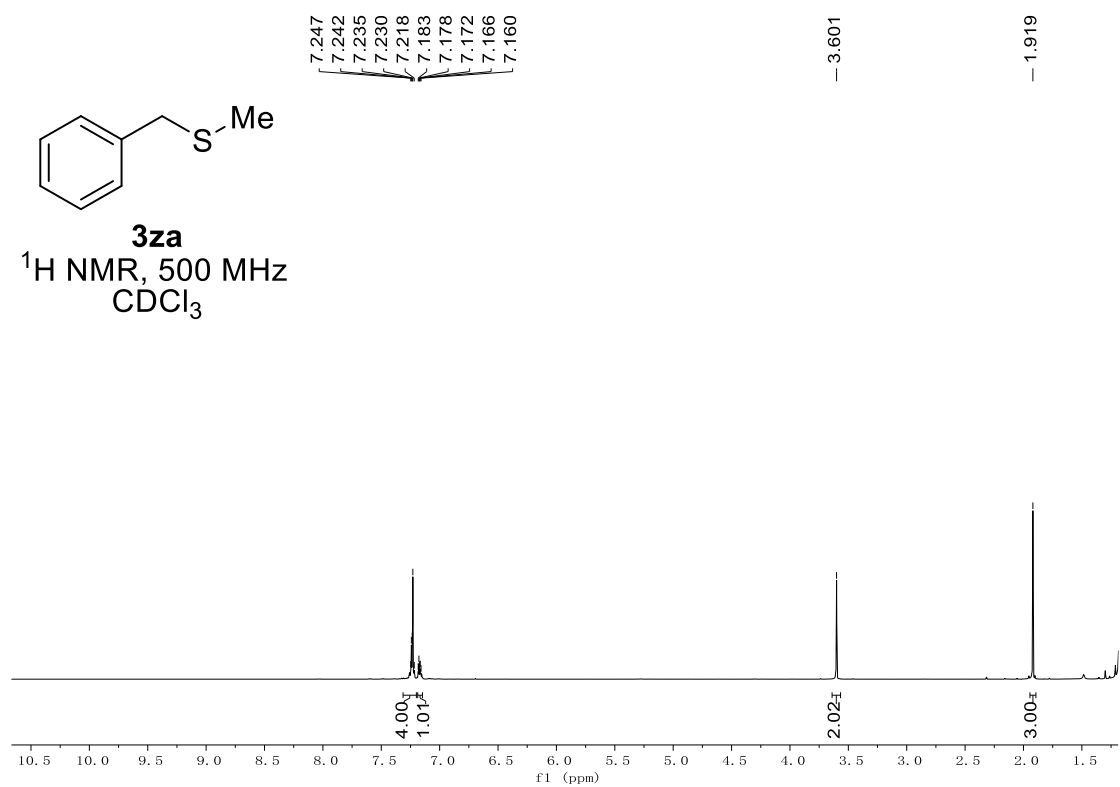

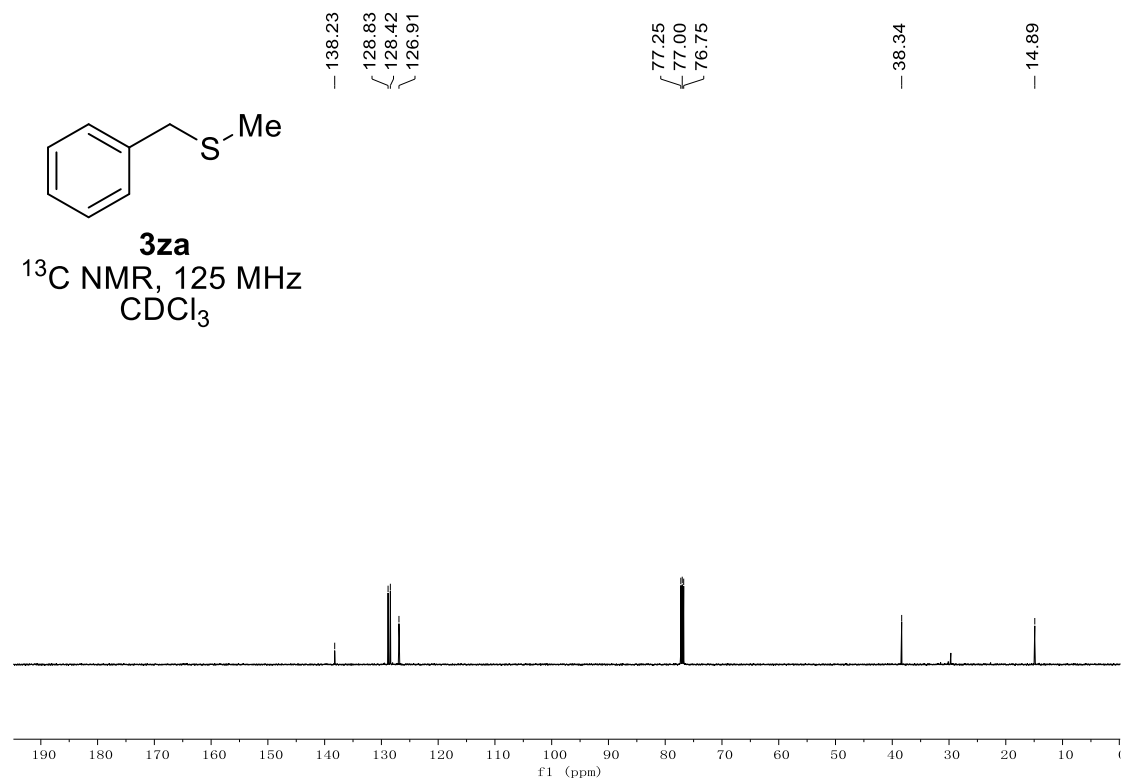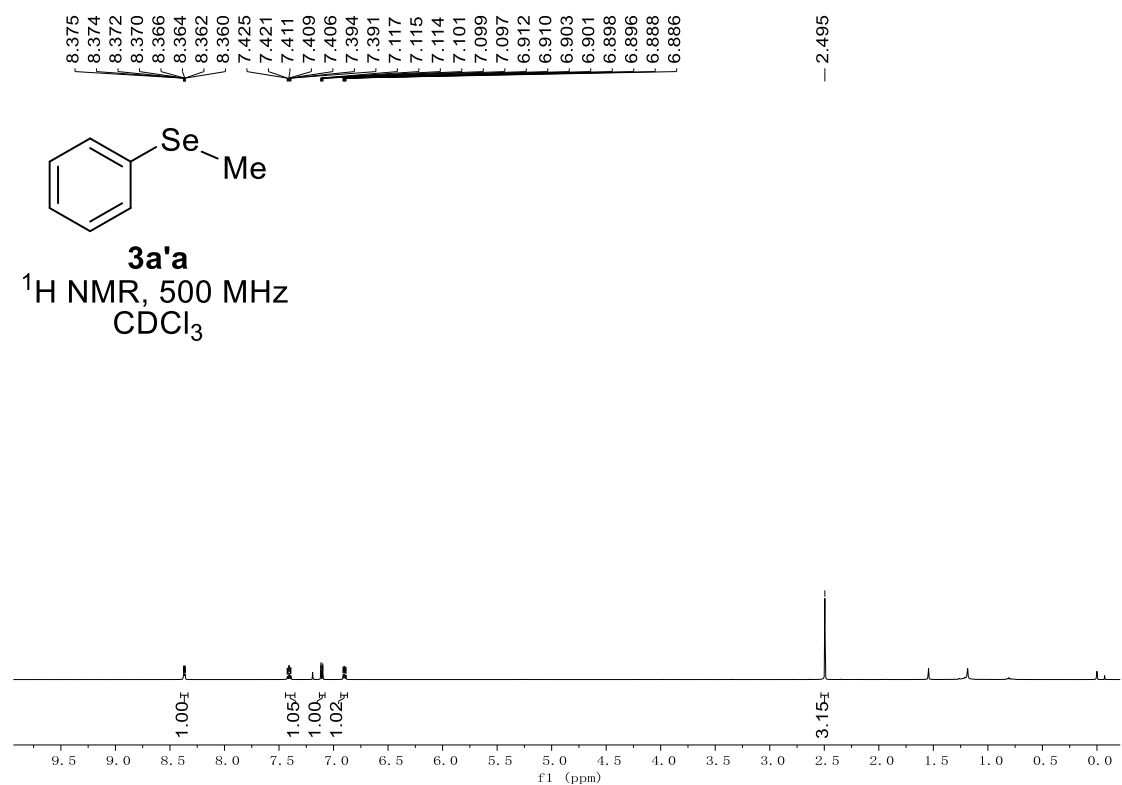

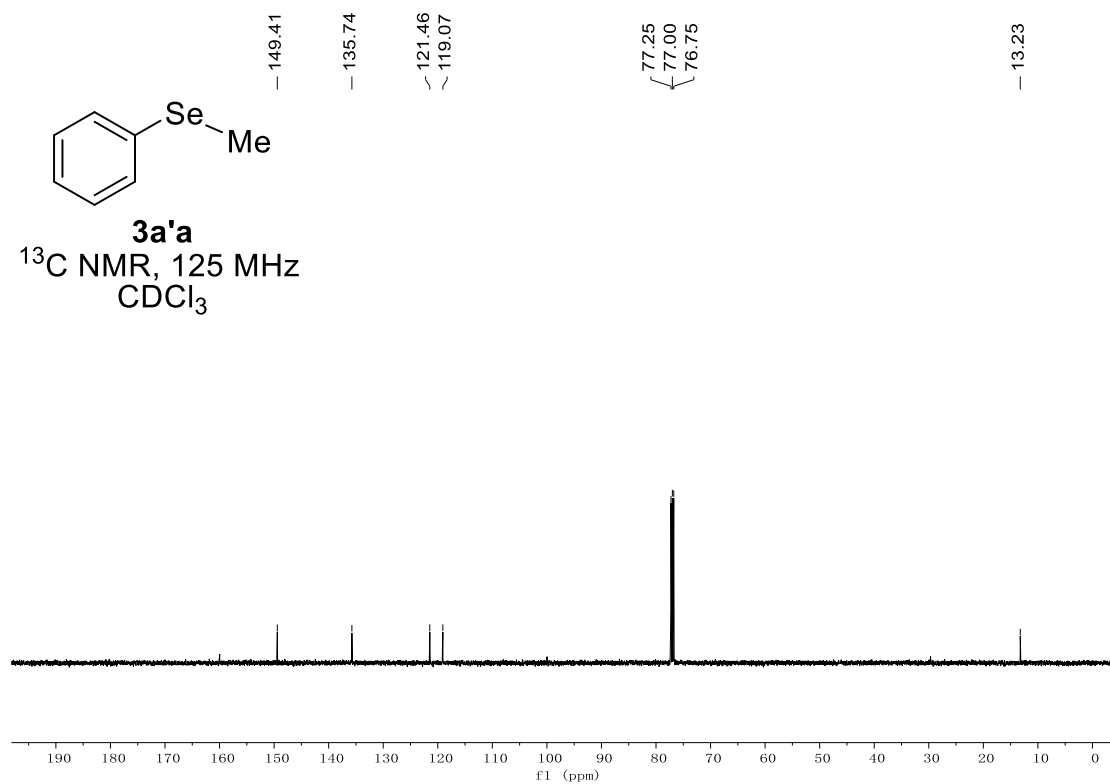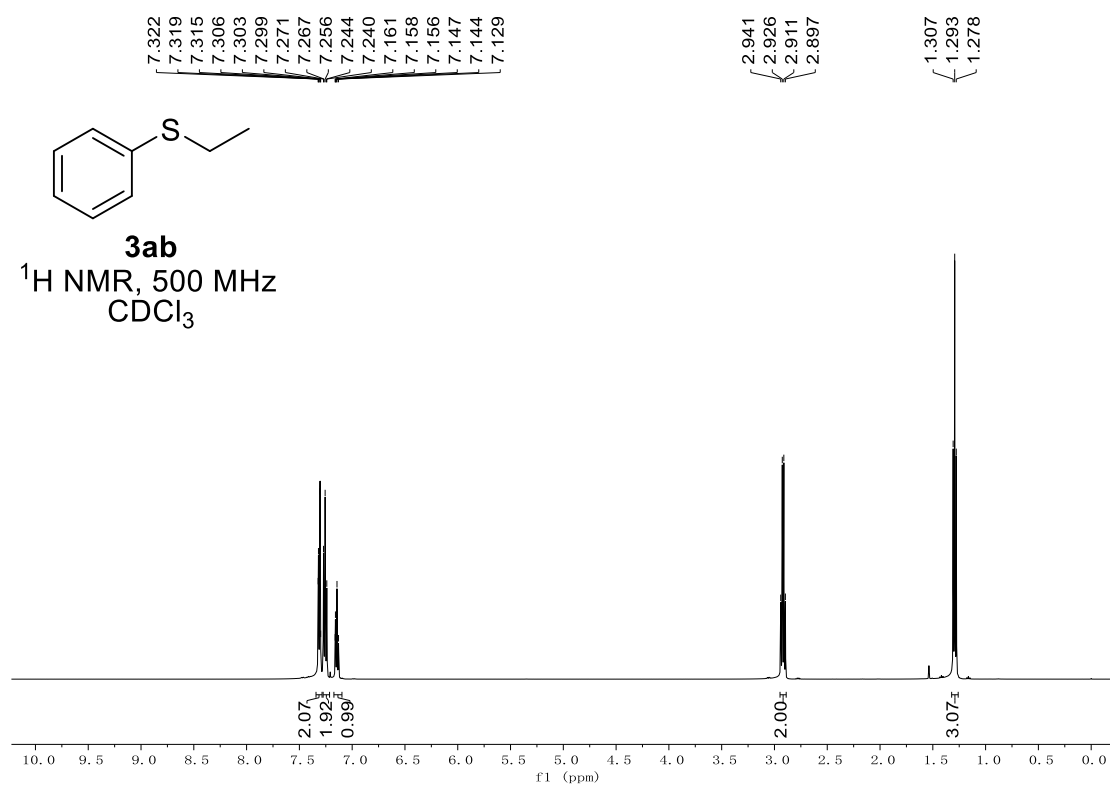

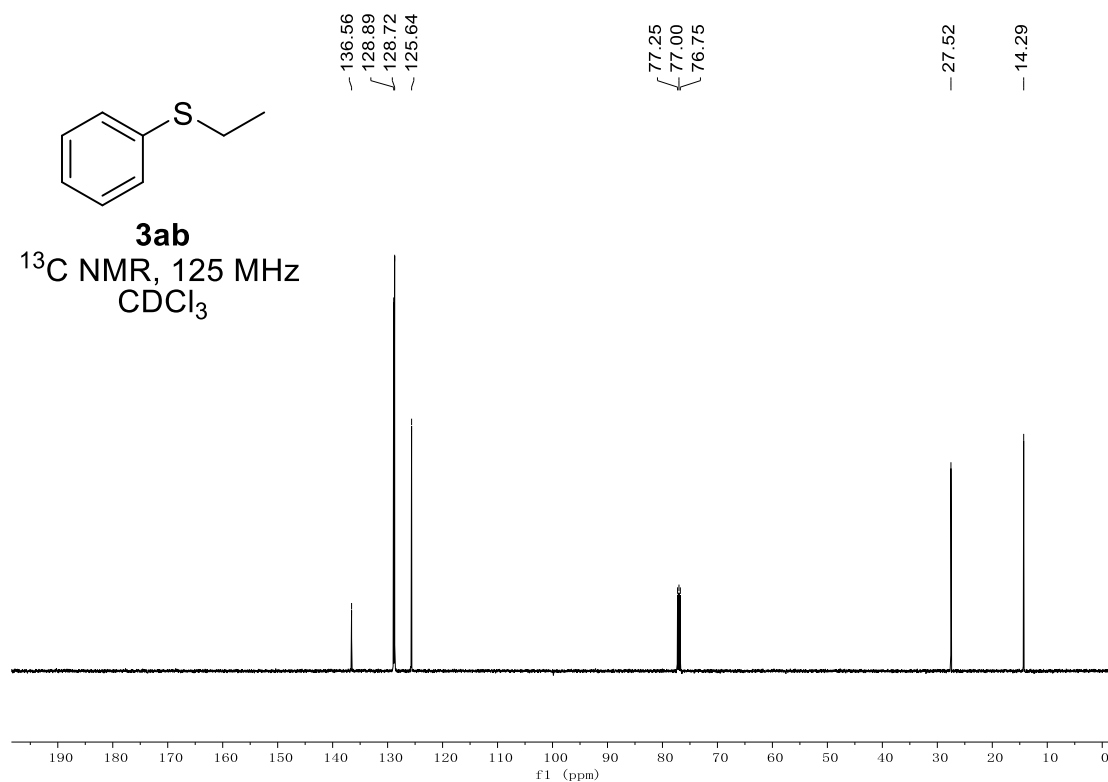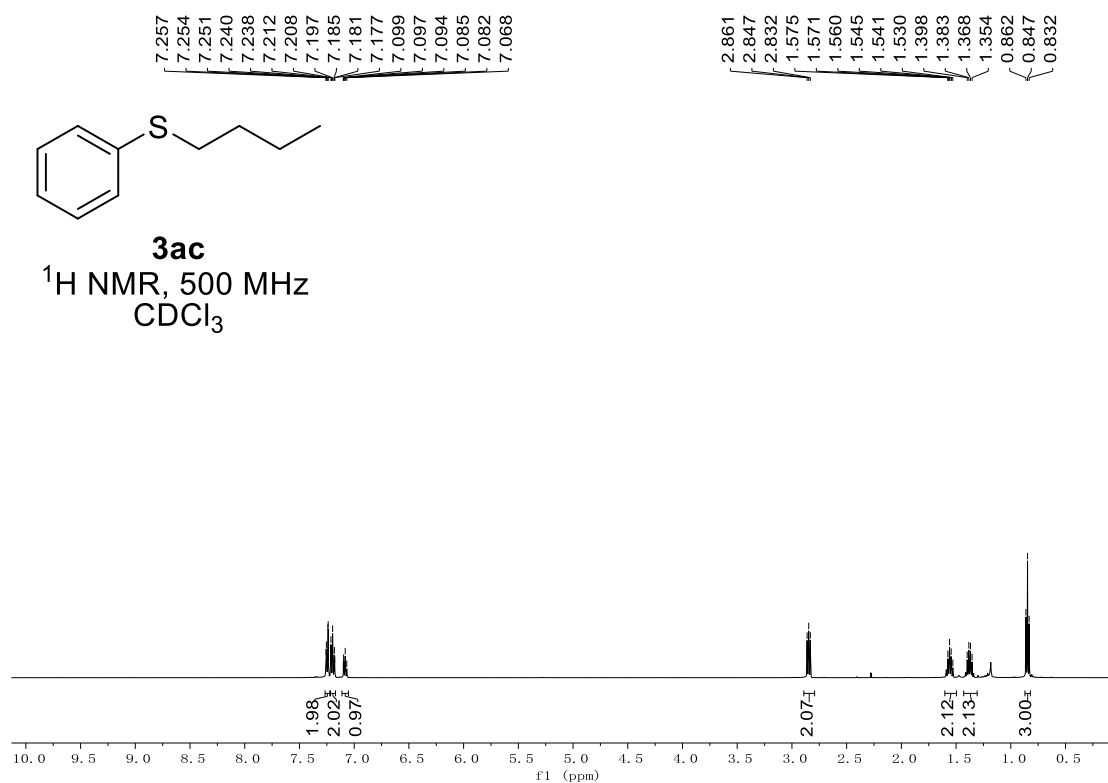

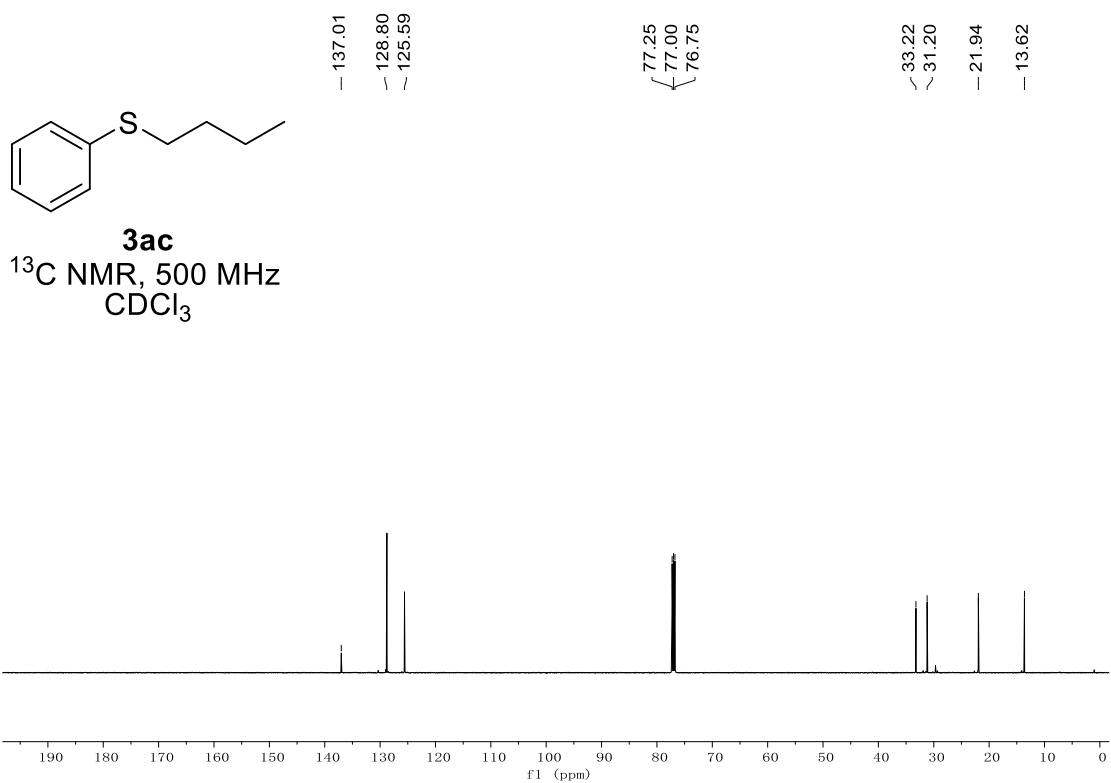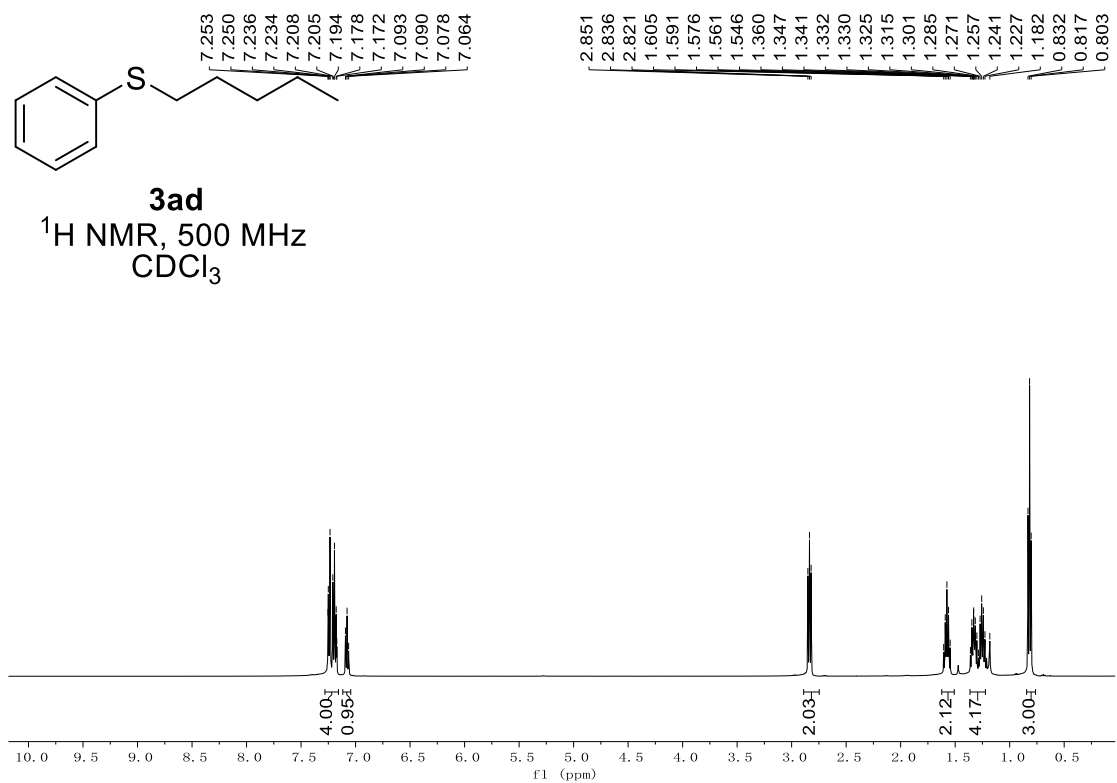

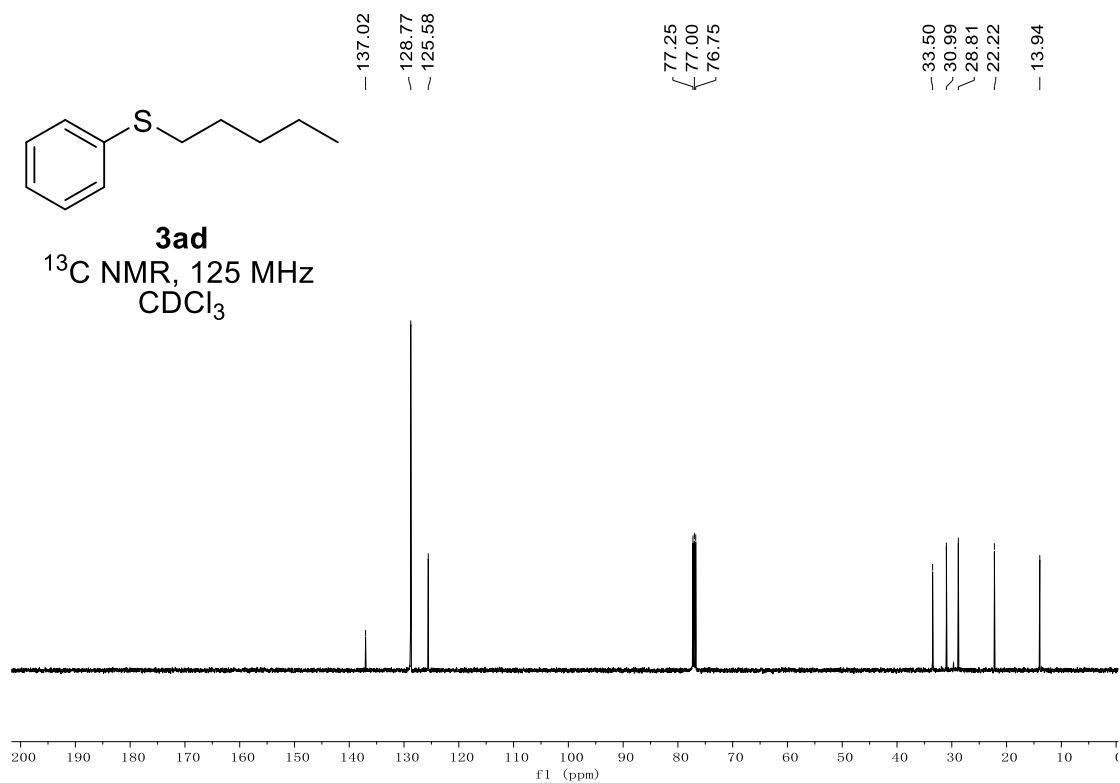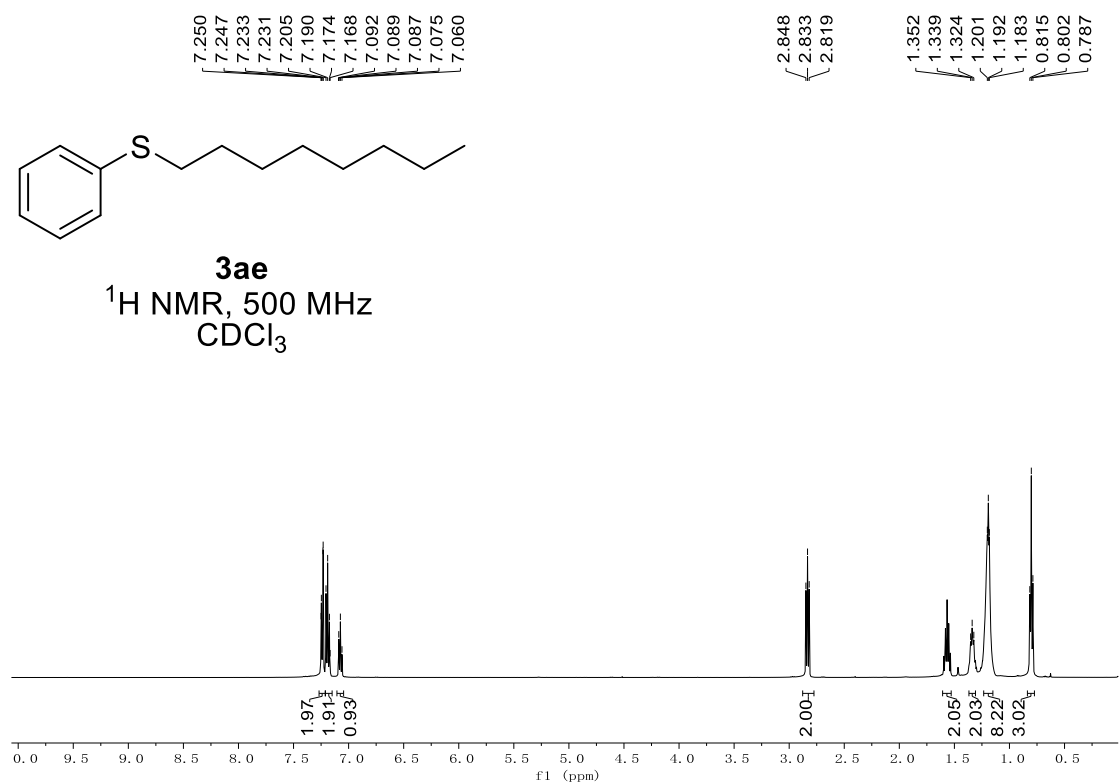

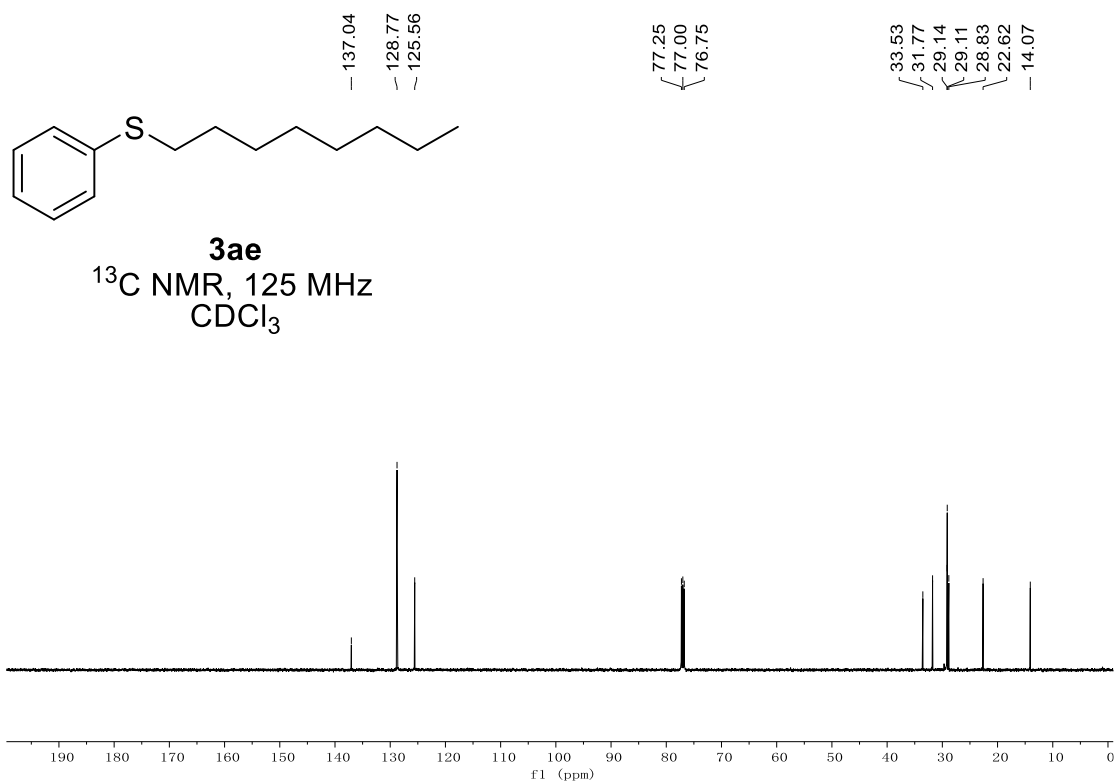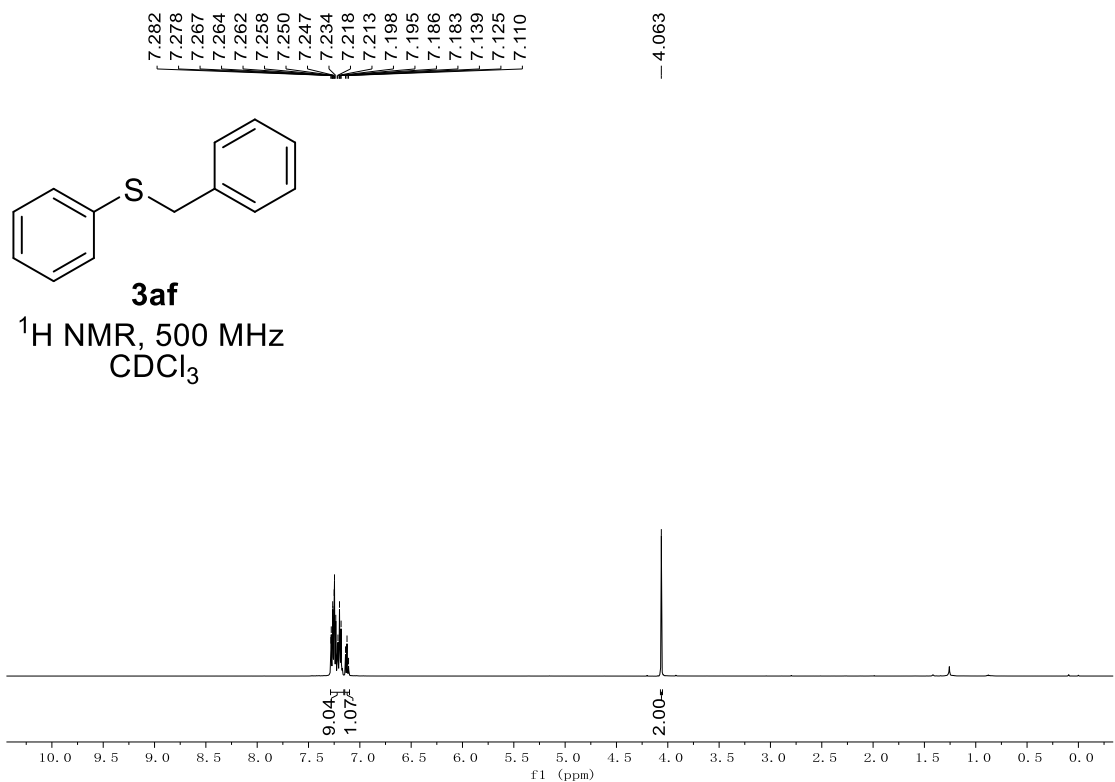

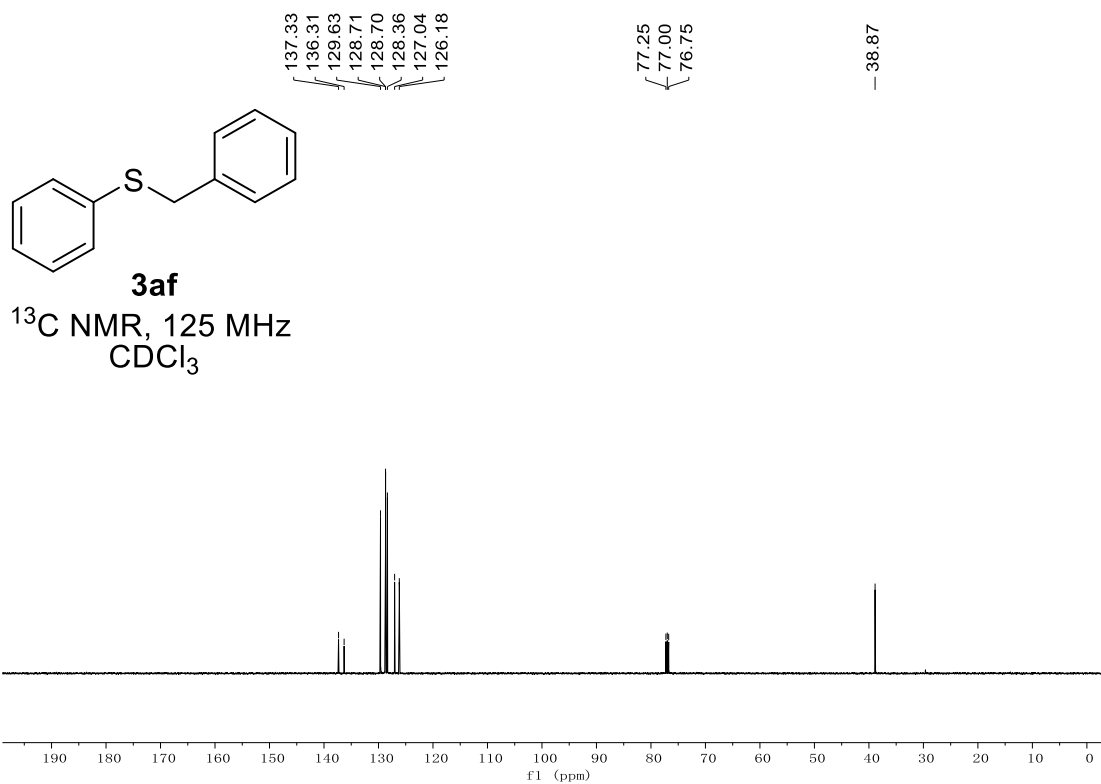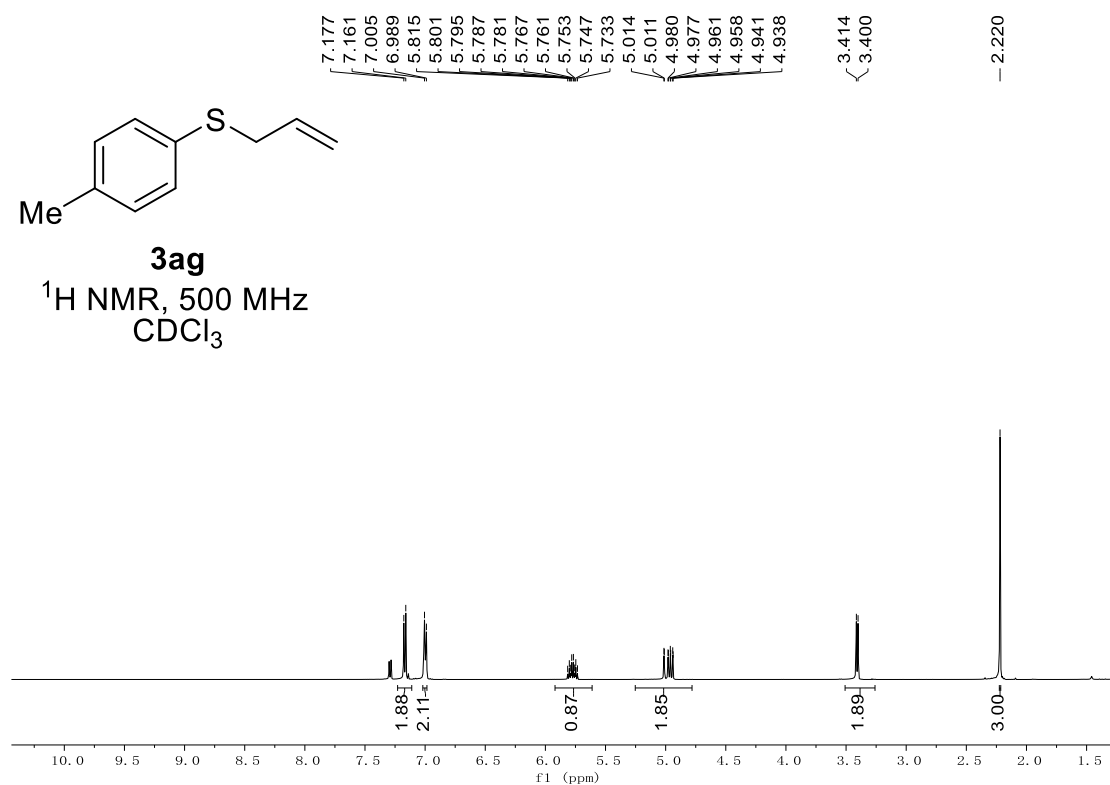

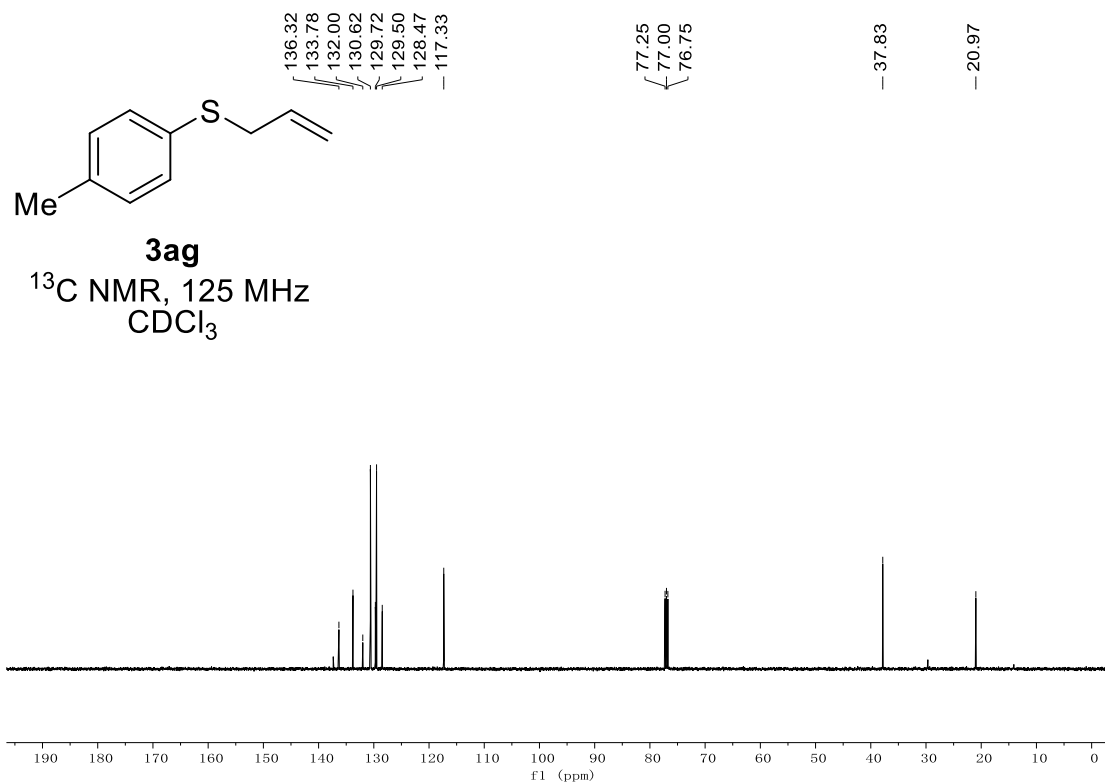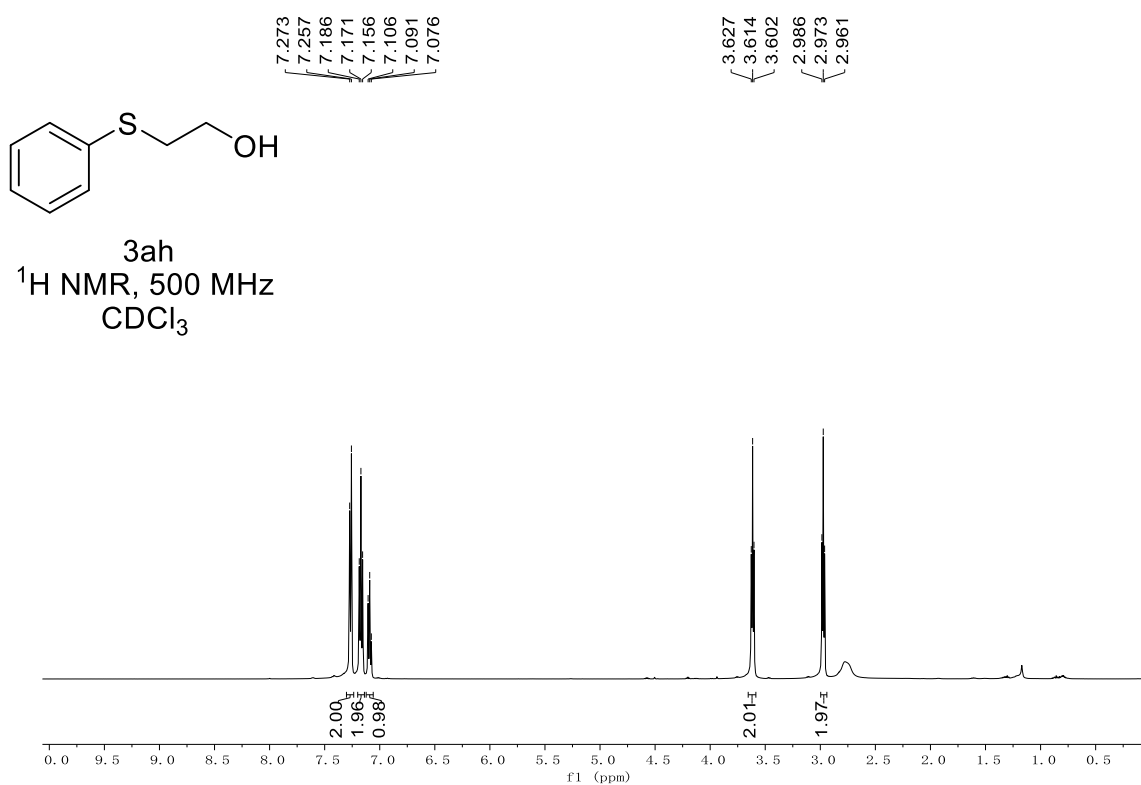

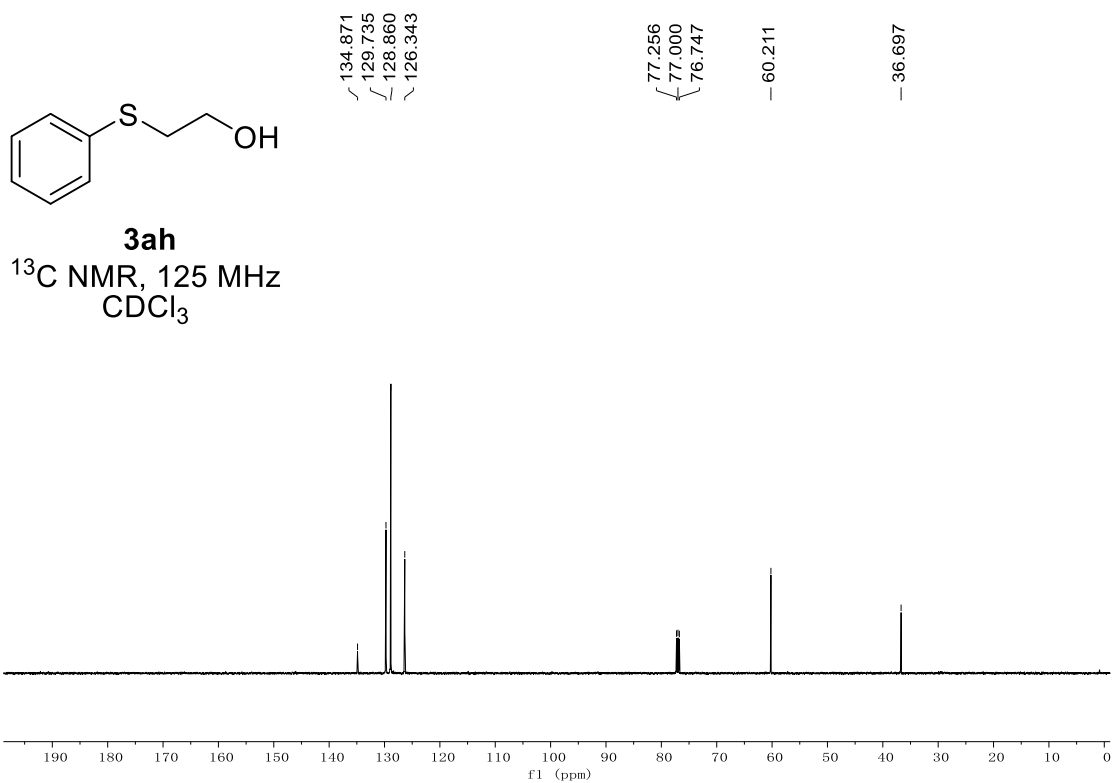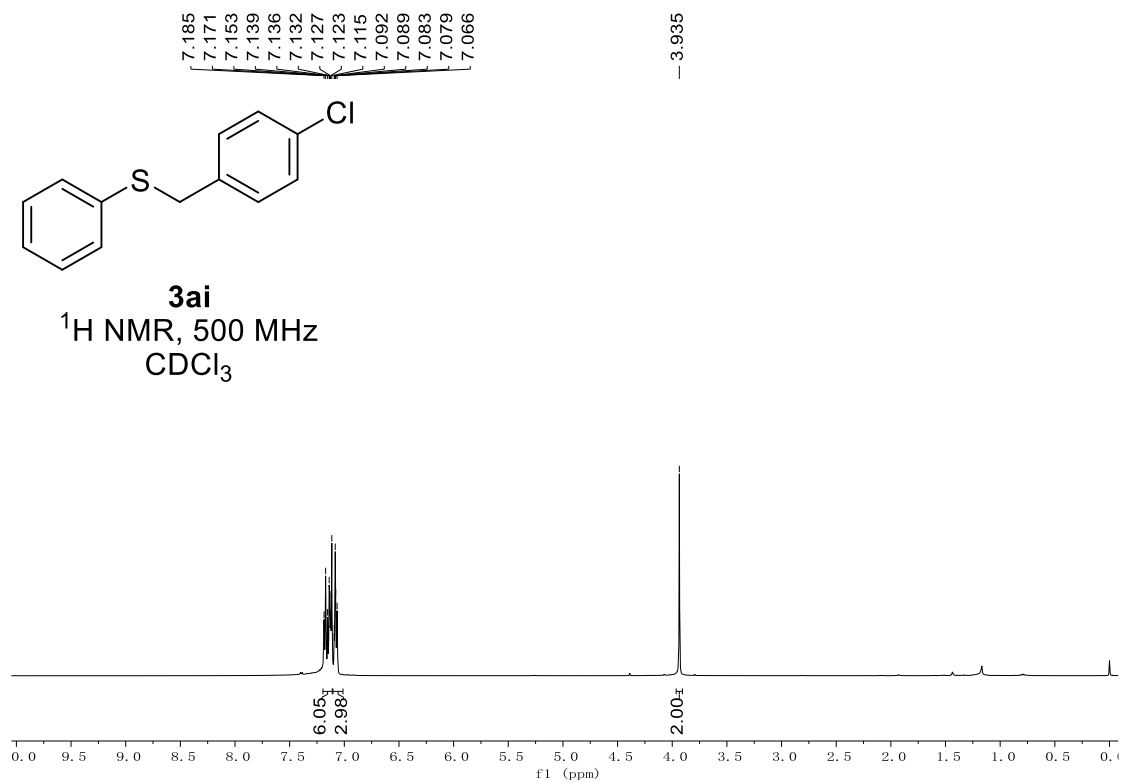

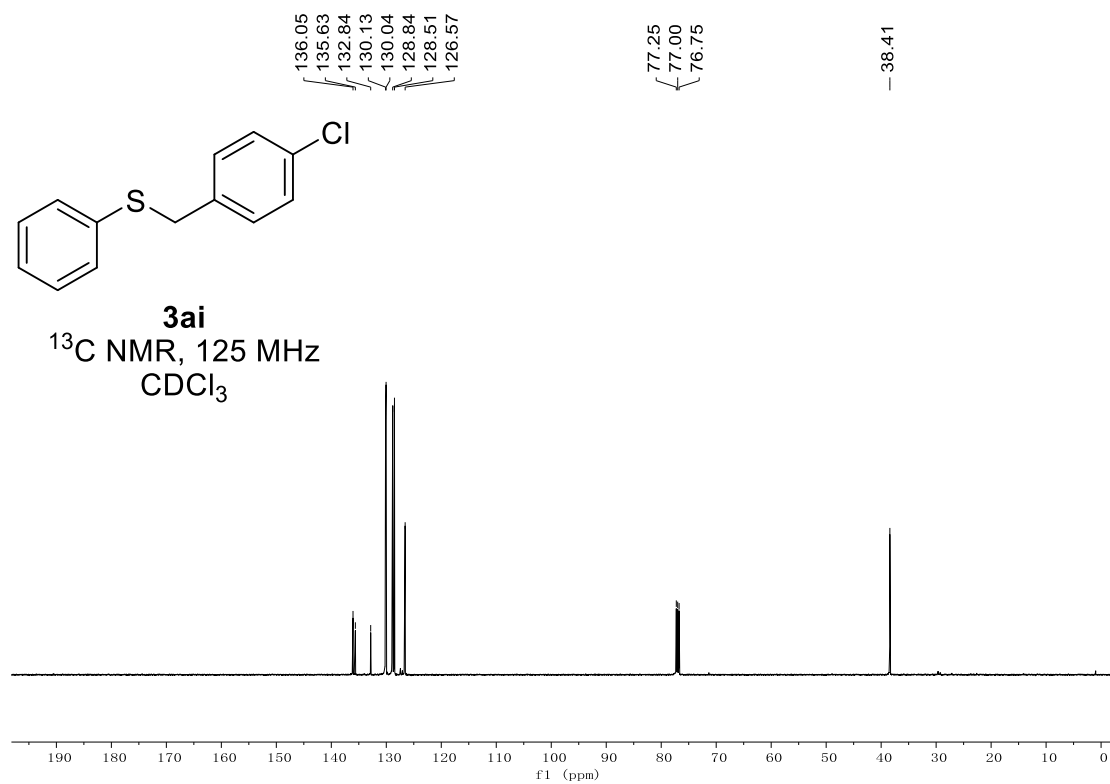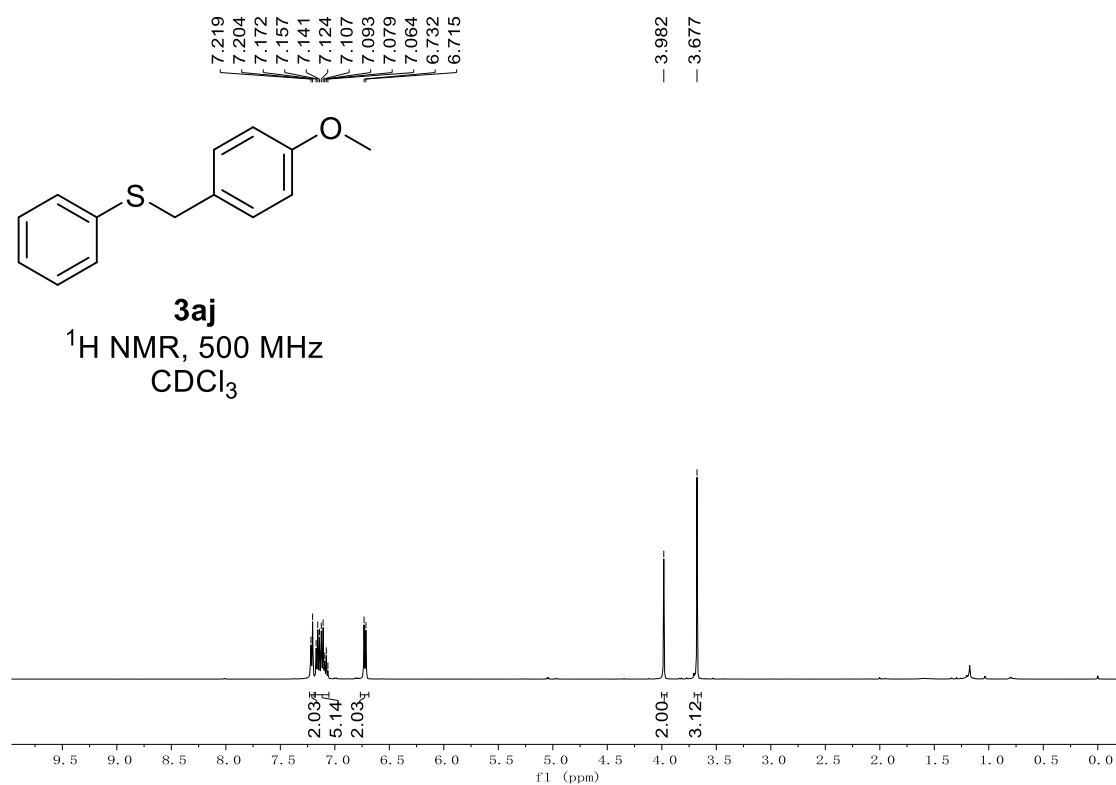

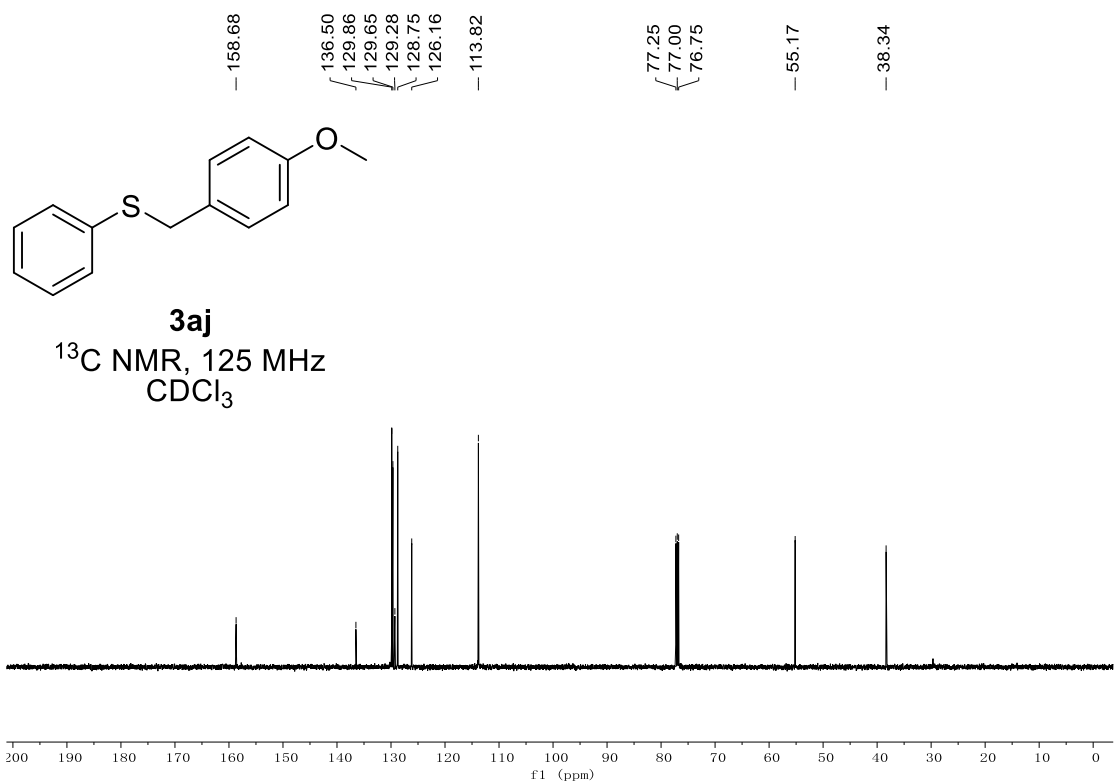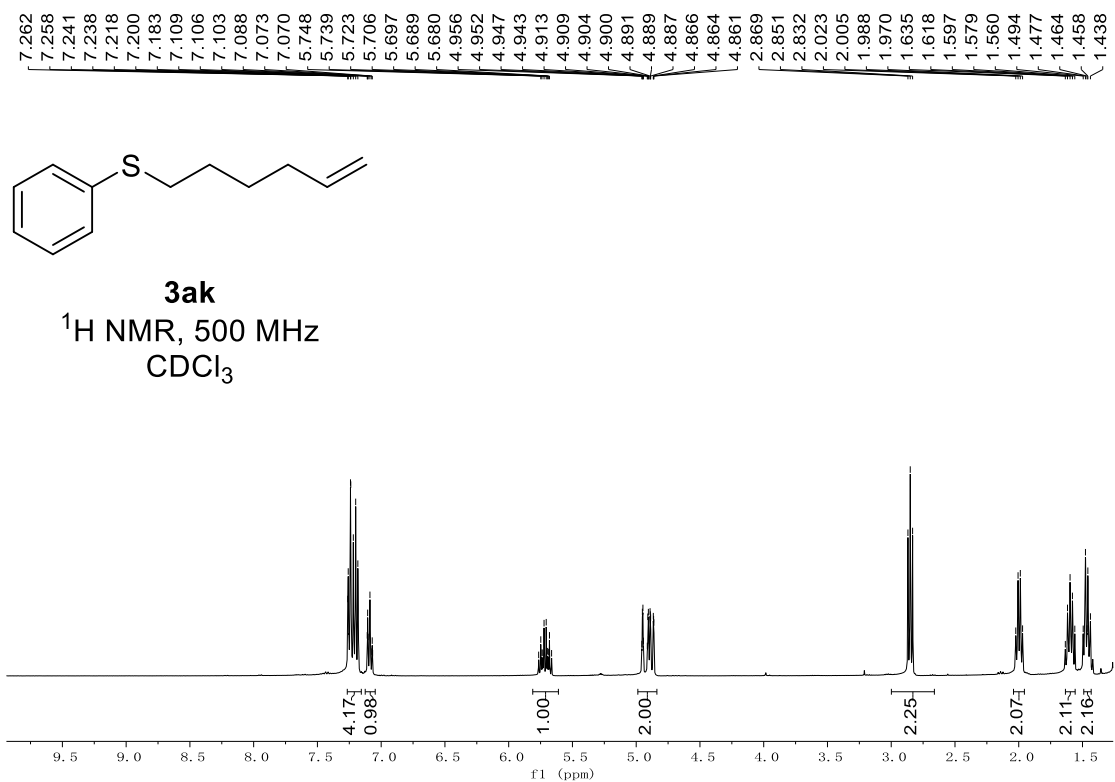

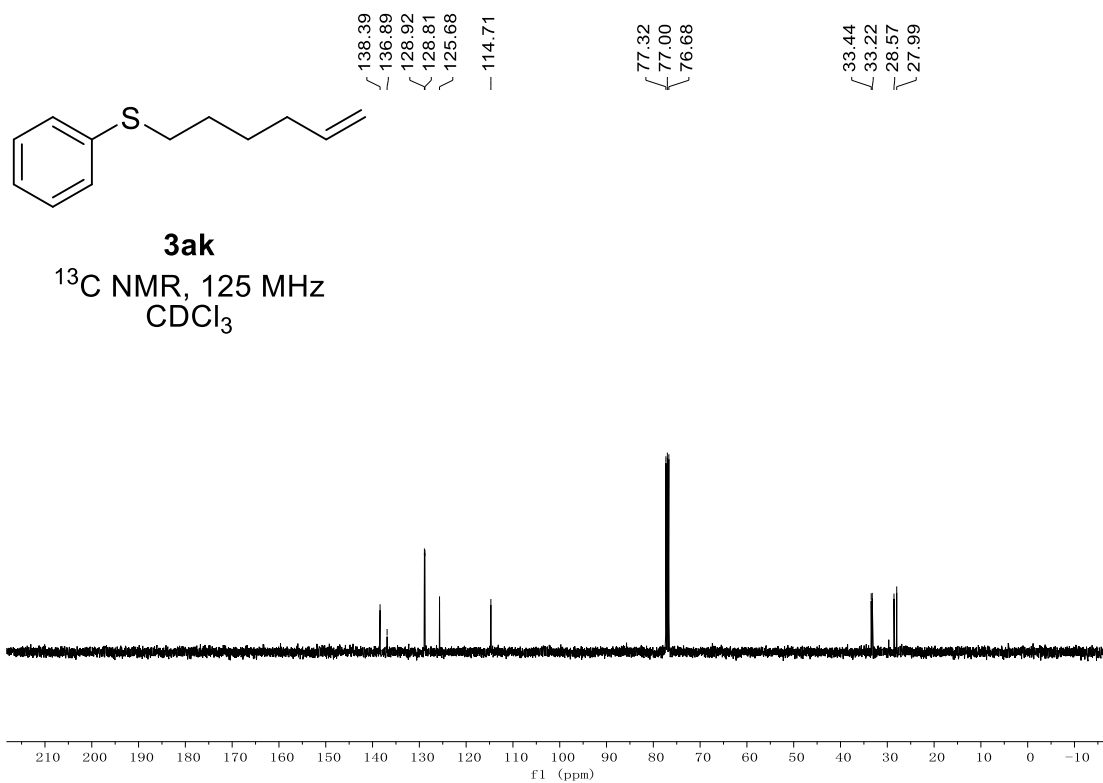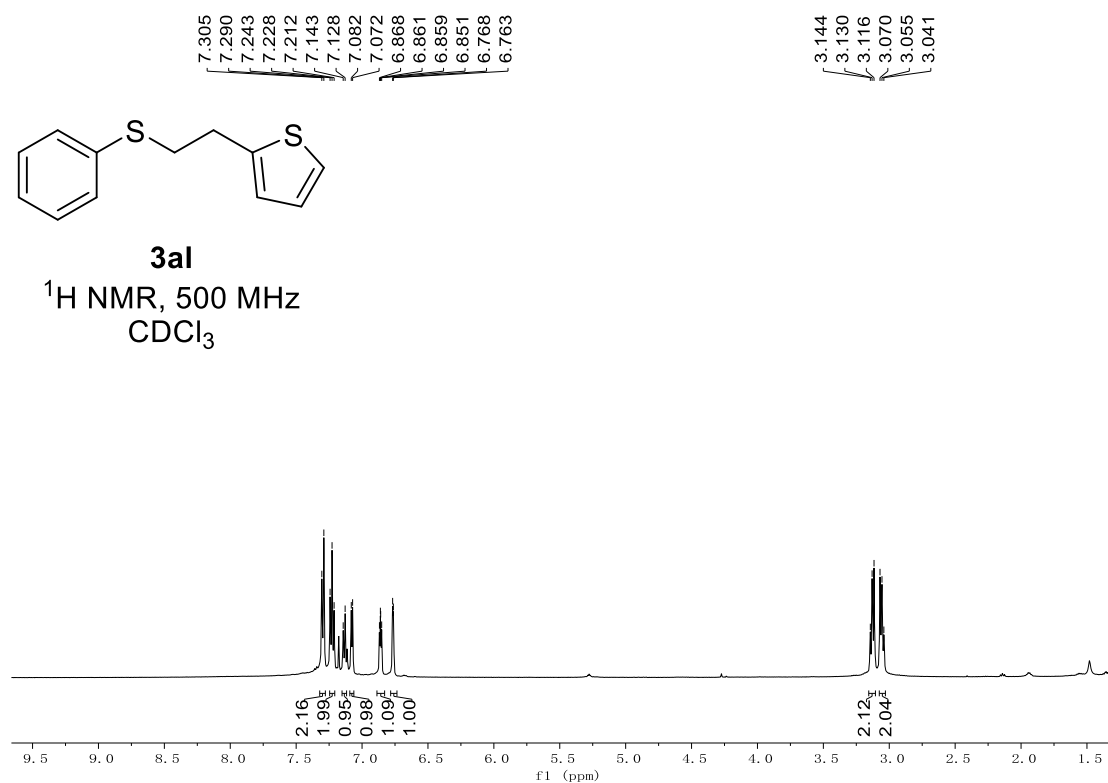

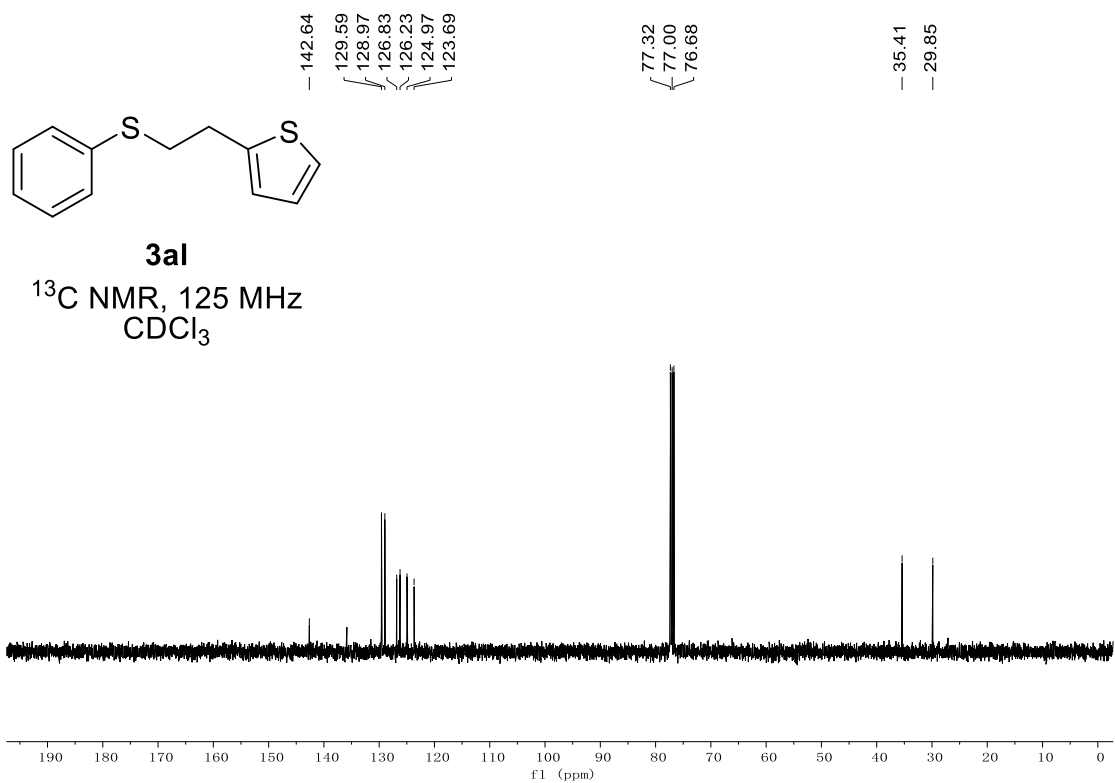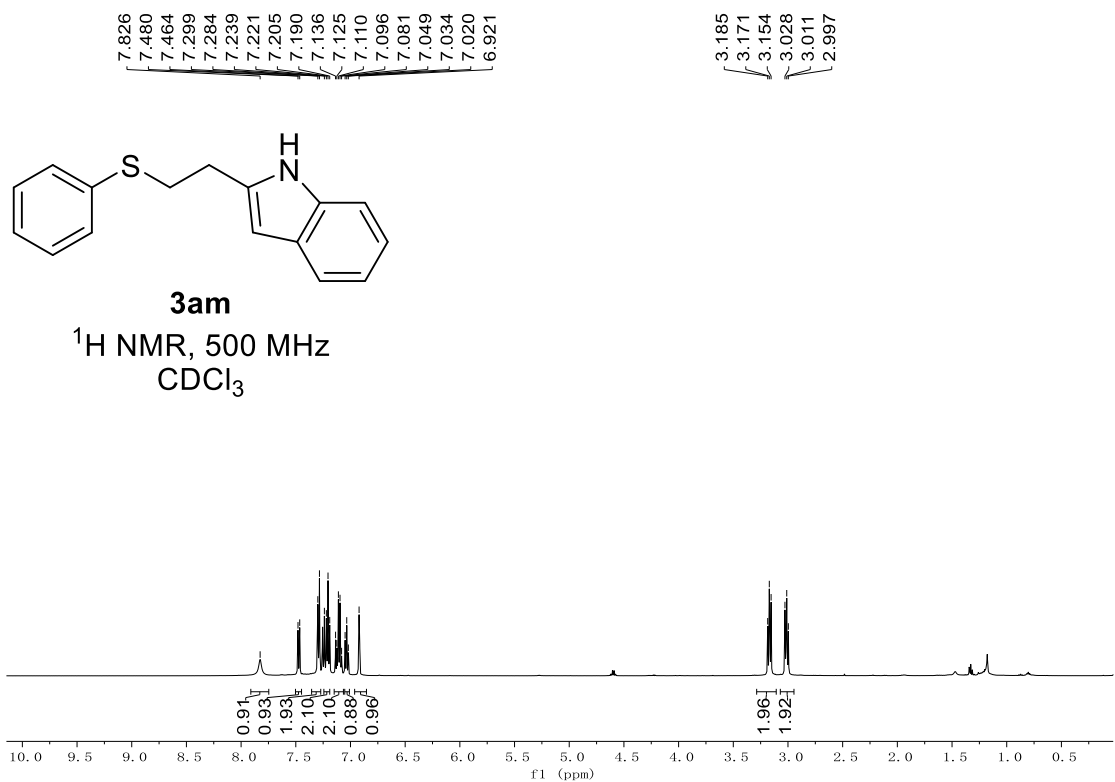

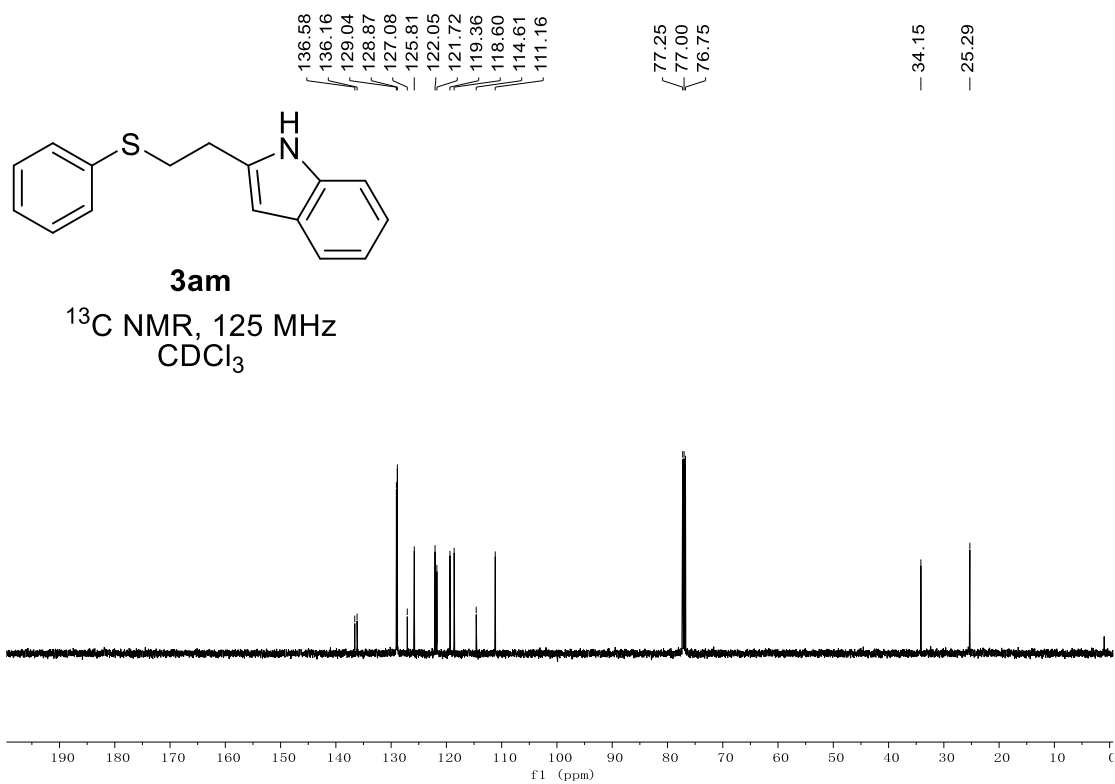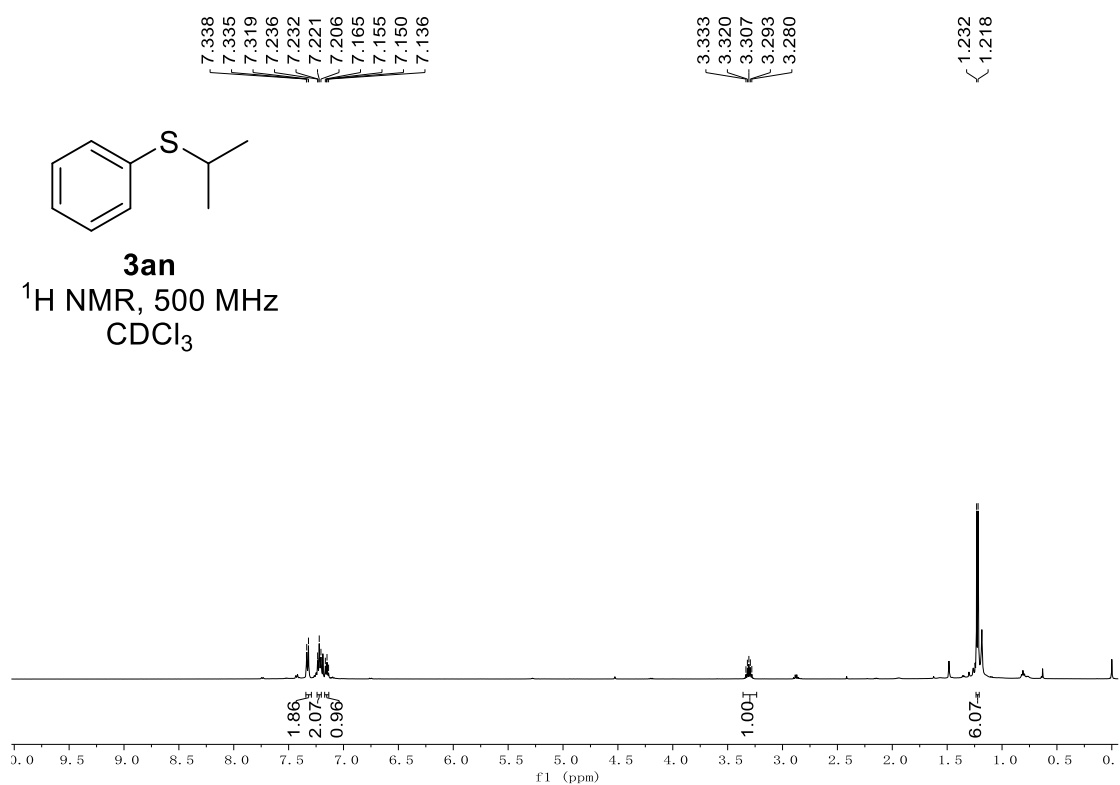

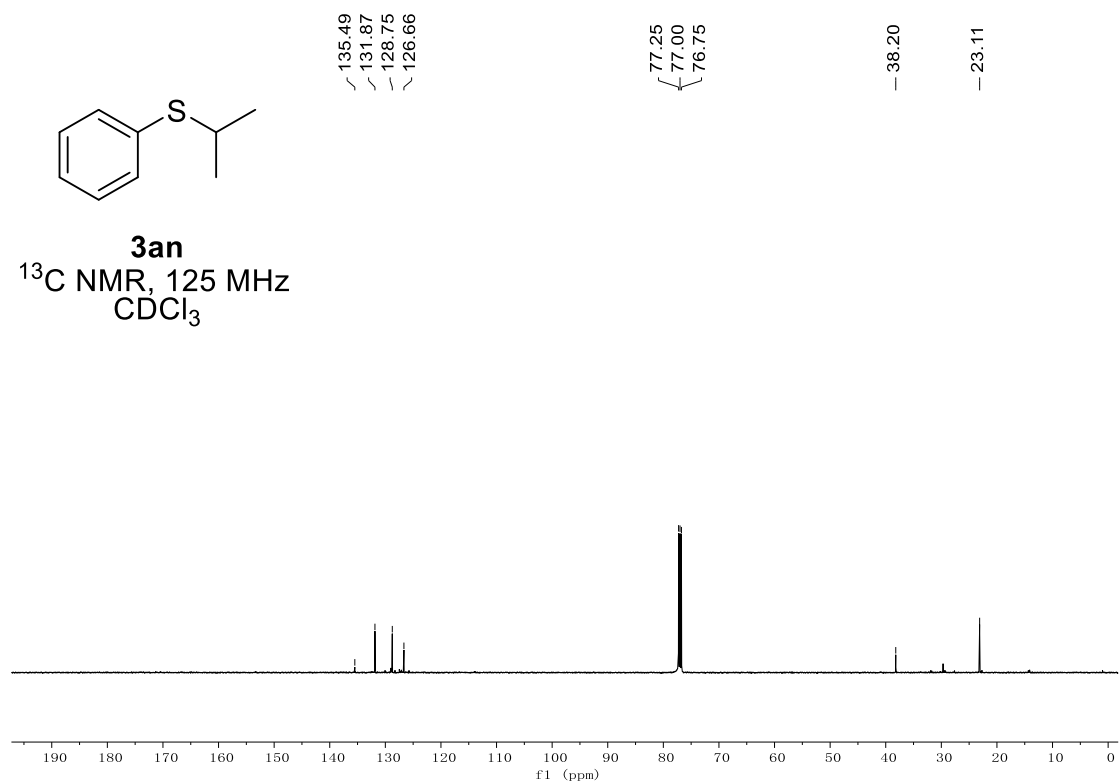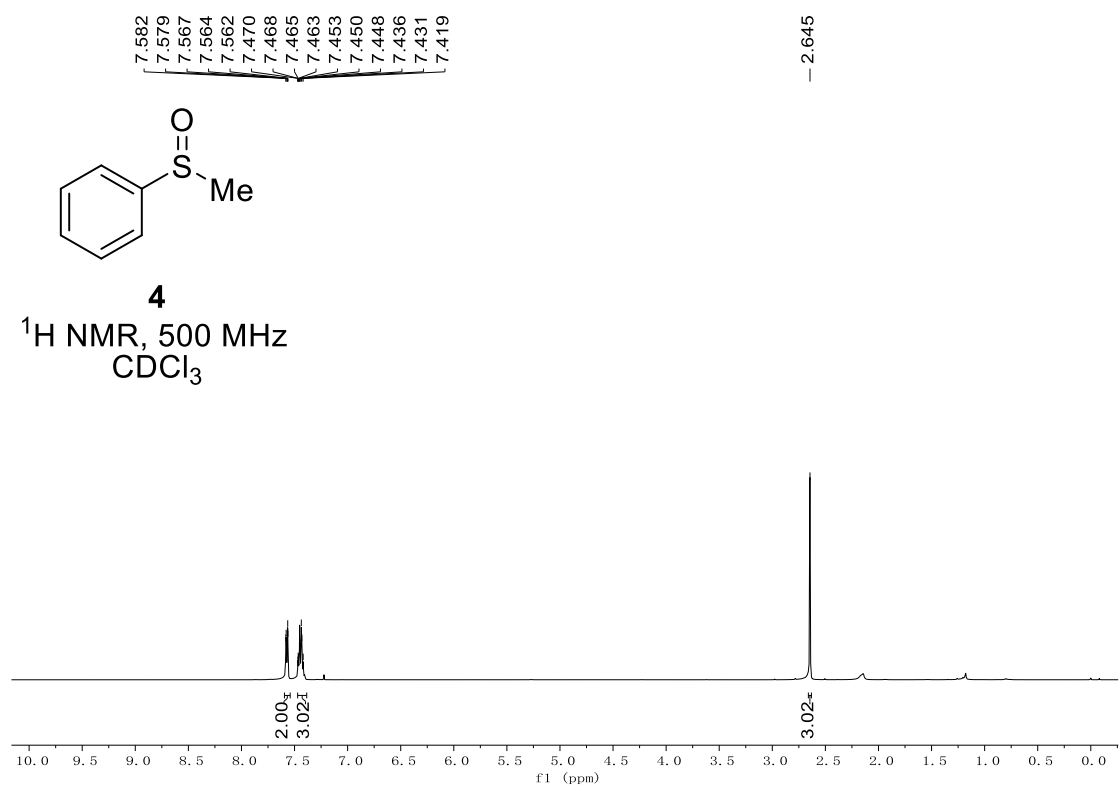

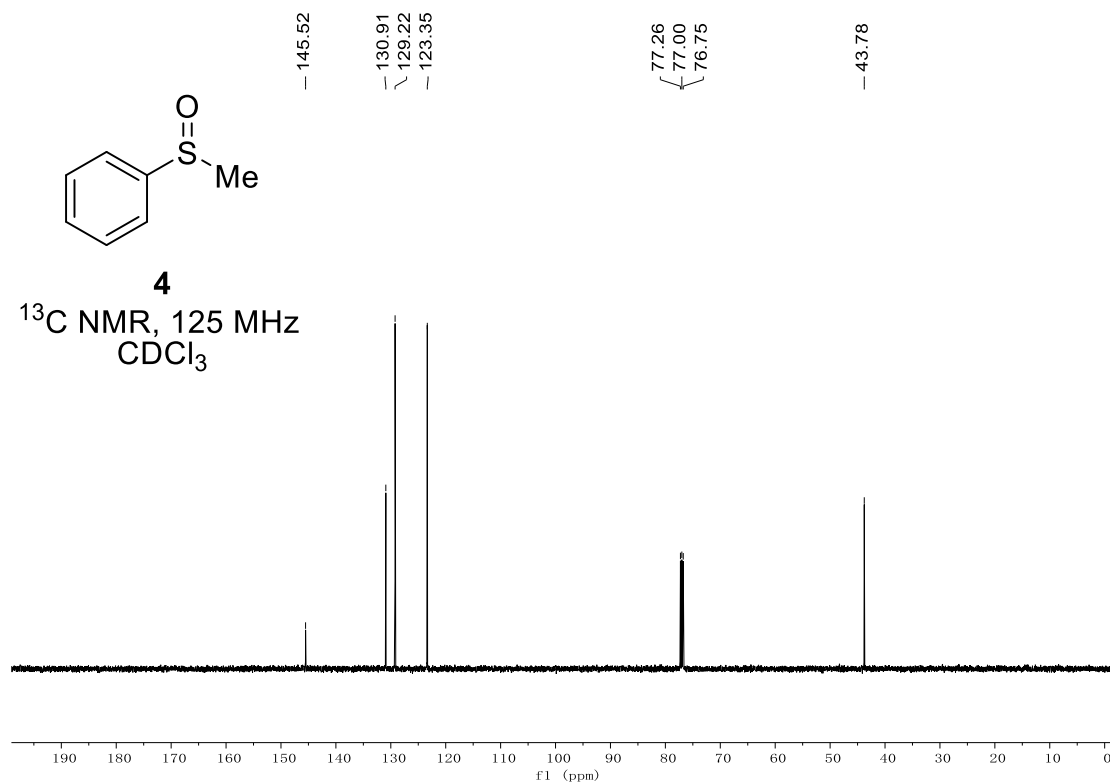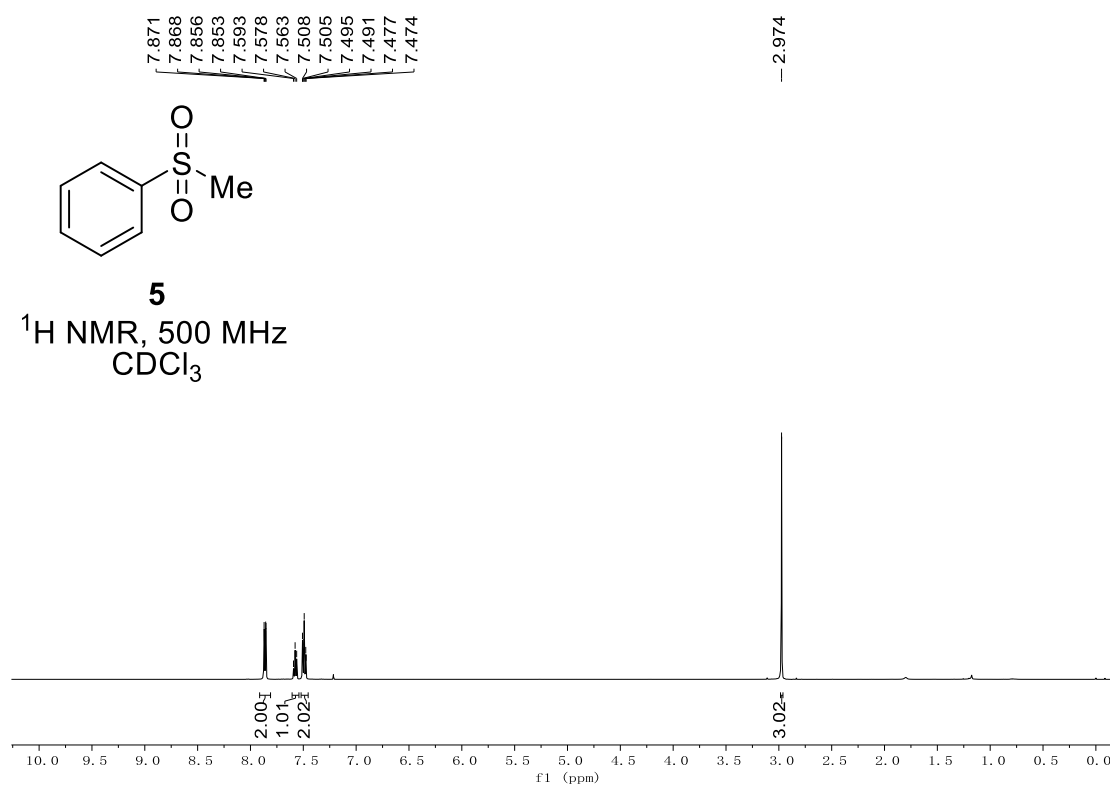

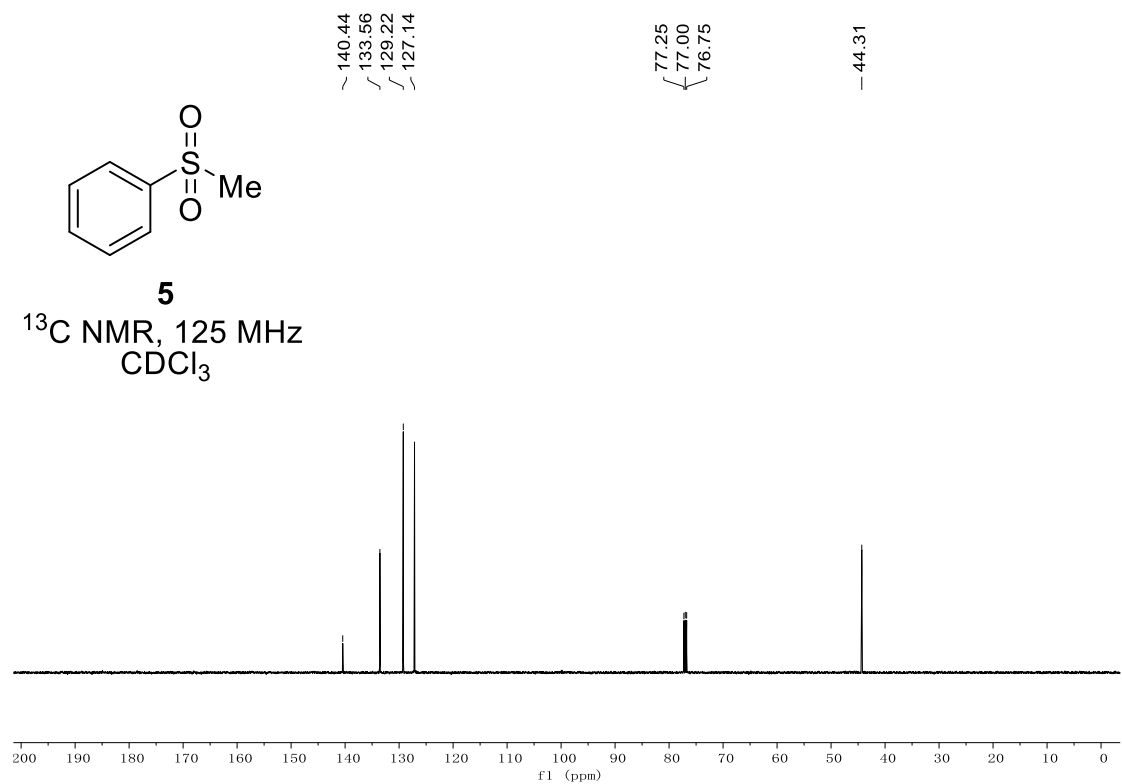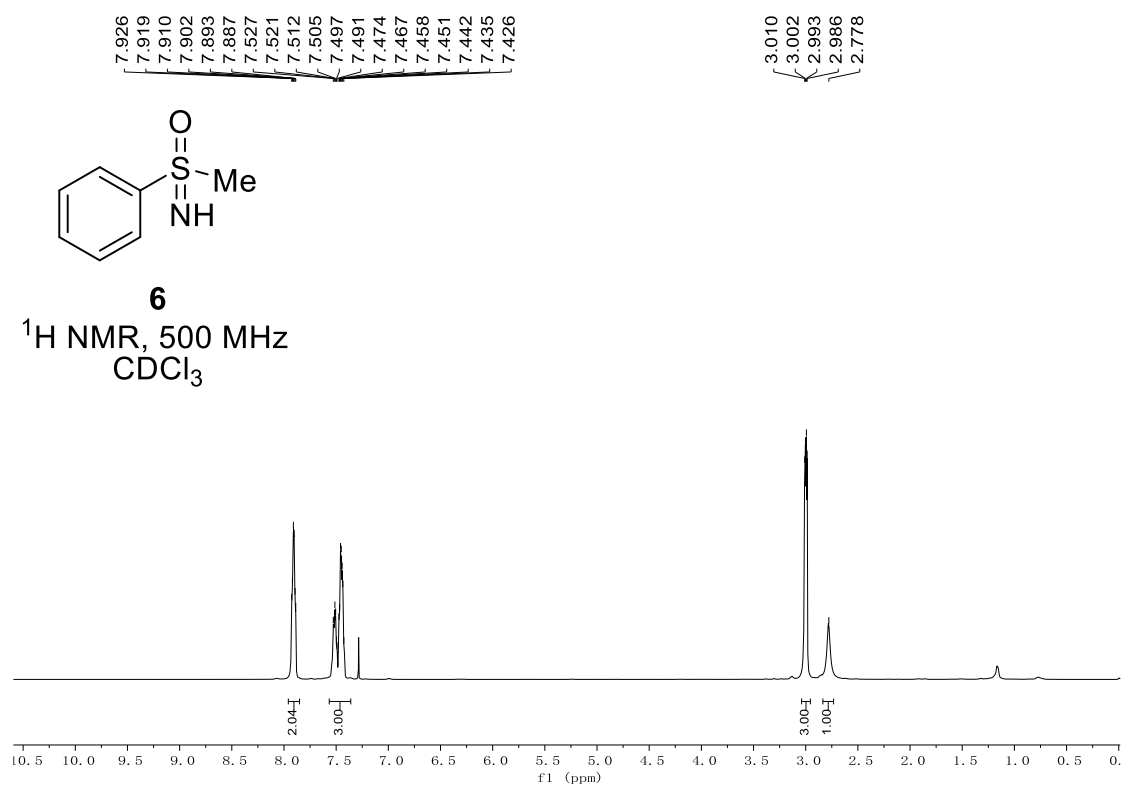

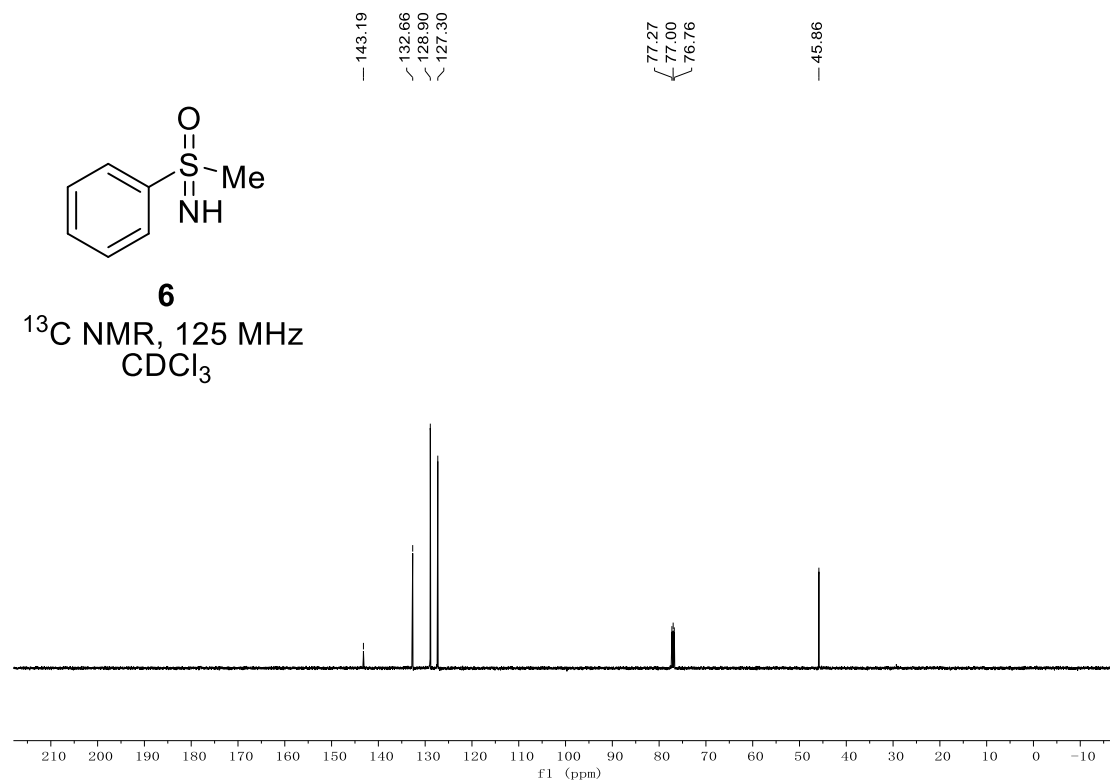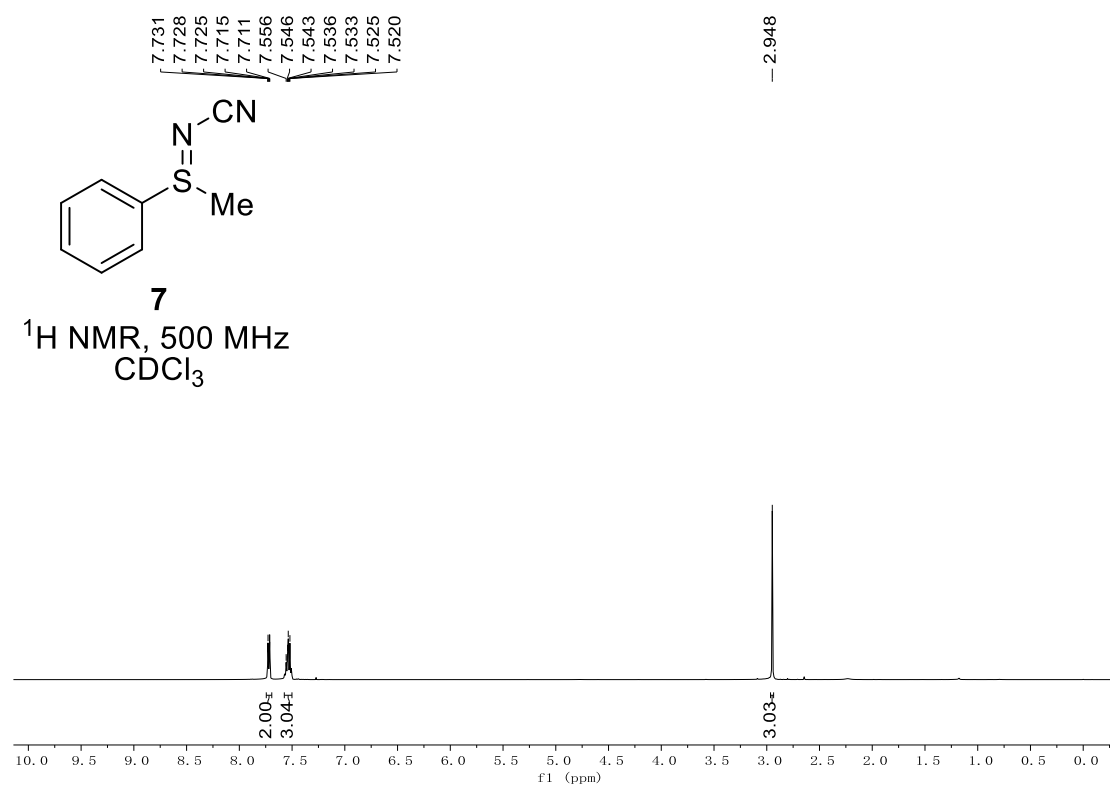

20230818-CP-0815

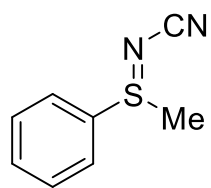

**7**

$^{13}\text{C}$  NMR, 125 MHz  
 $\text{CDCl}_3$

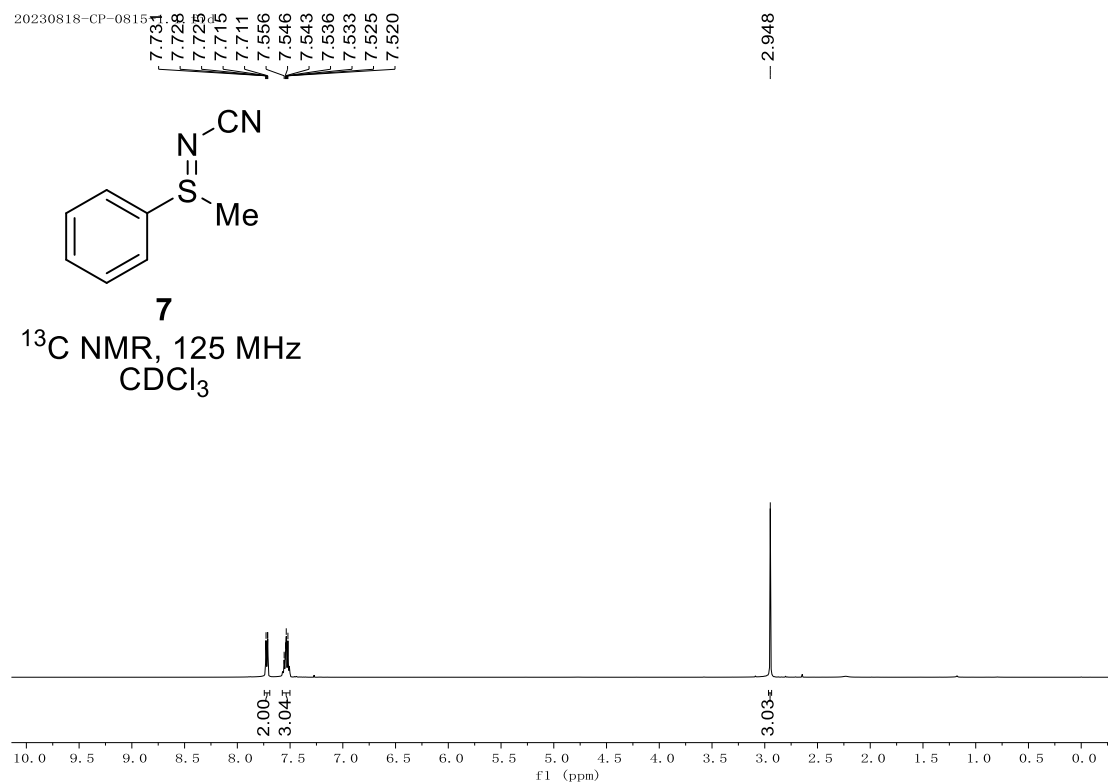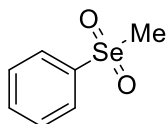

$^1\text{H}$  NMR, 500 MHz  
 $\text{CDCl}_3$

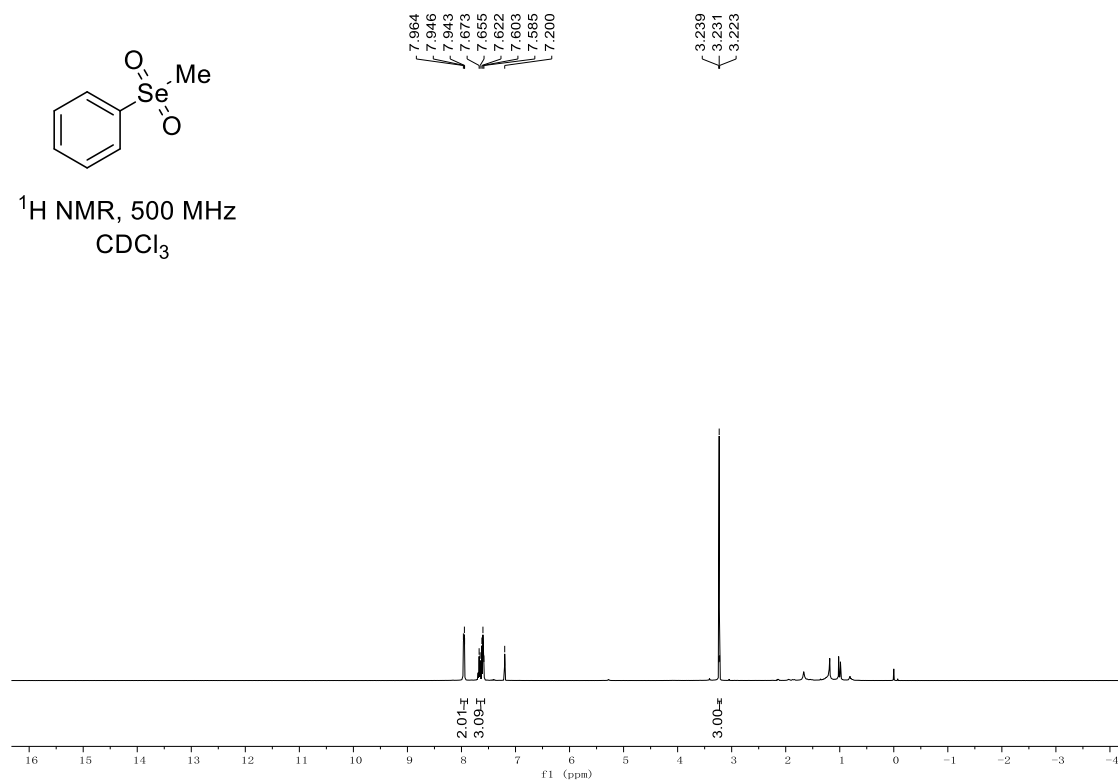

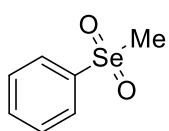

$^{13}\text{C}$  NMR, 125 MHz  
 $\text{CDCl}_3$

142.569  
134.452  
130.377  
126.537  
77.356  $\text{CDCl}_3$   
77.039  $\text{CDCl}_3$   
76.722  $\text{CDCl}_3$   
44.302

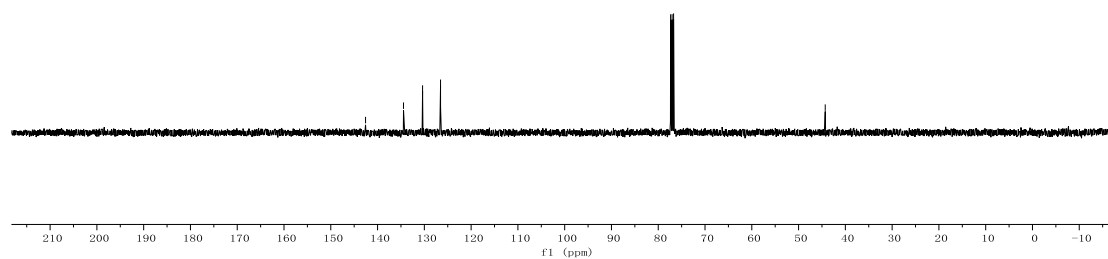

## 6. MS Spectra

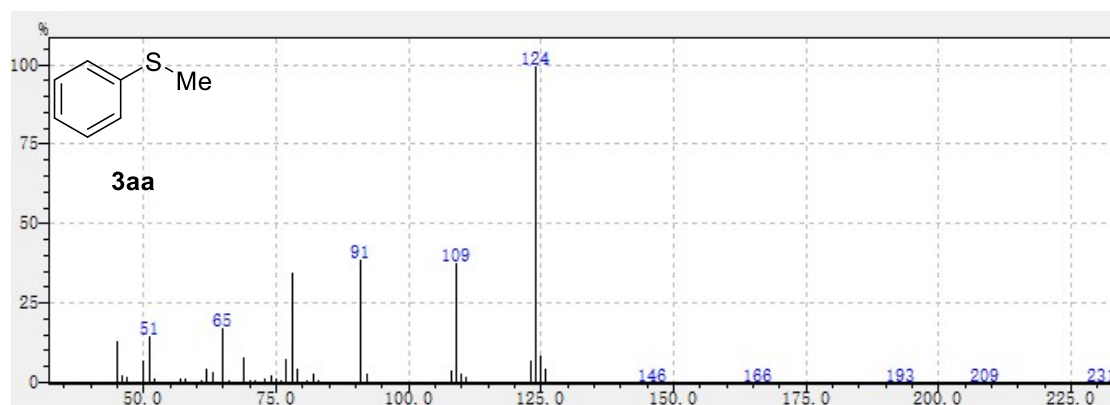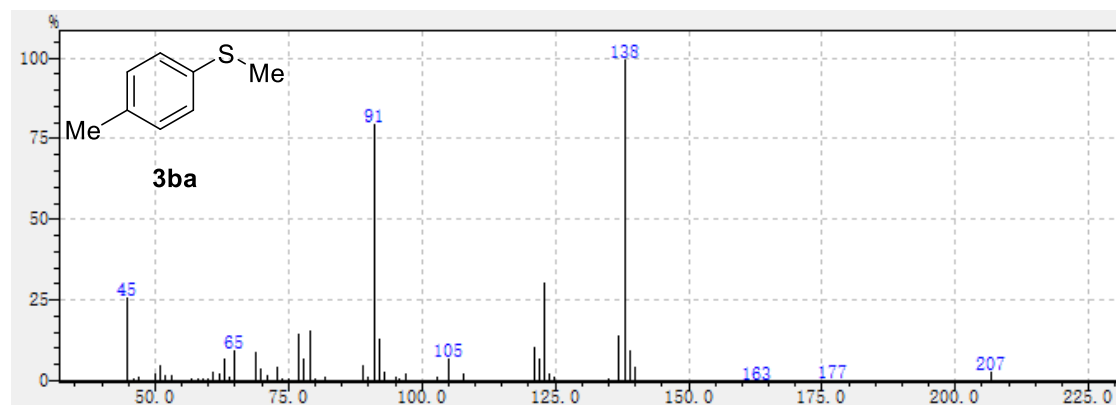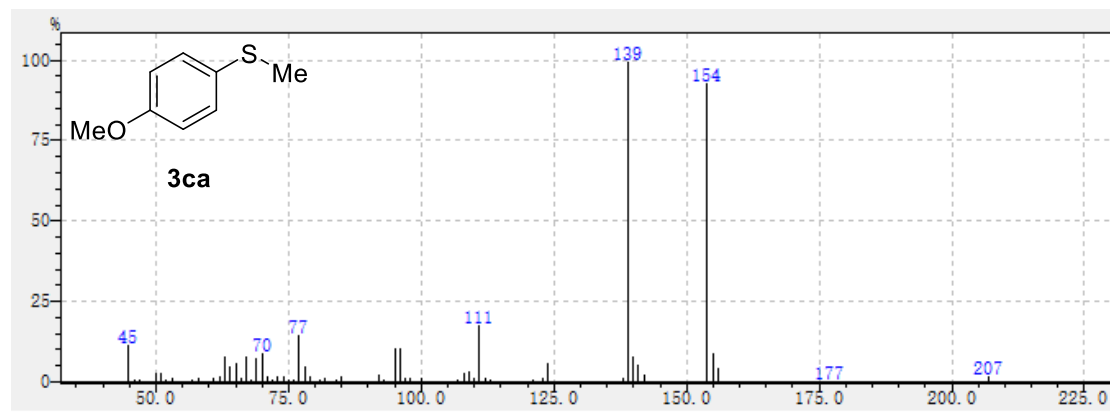

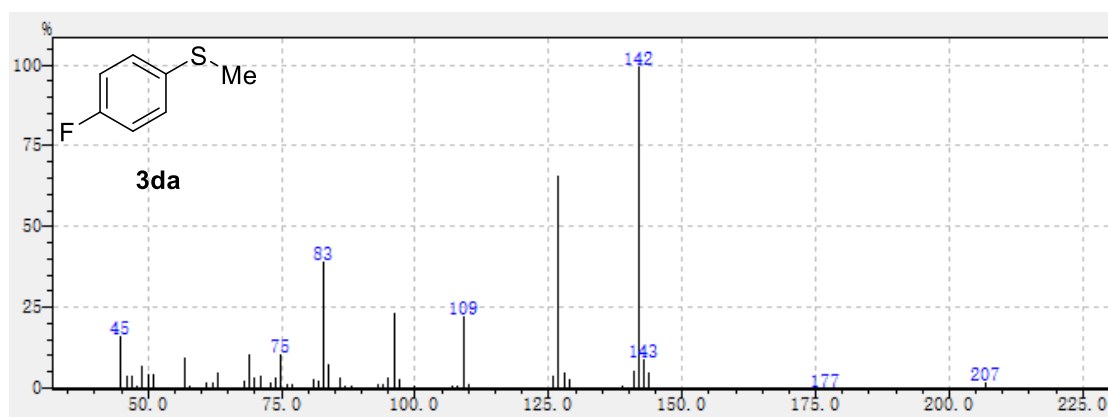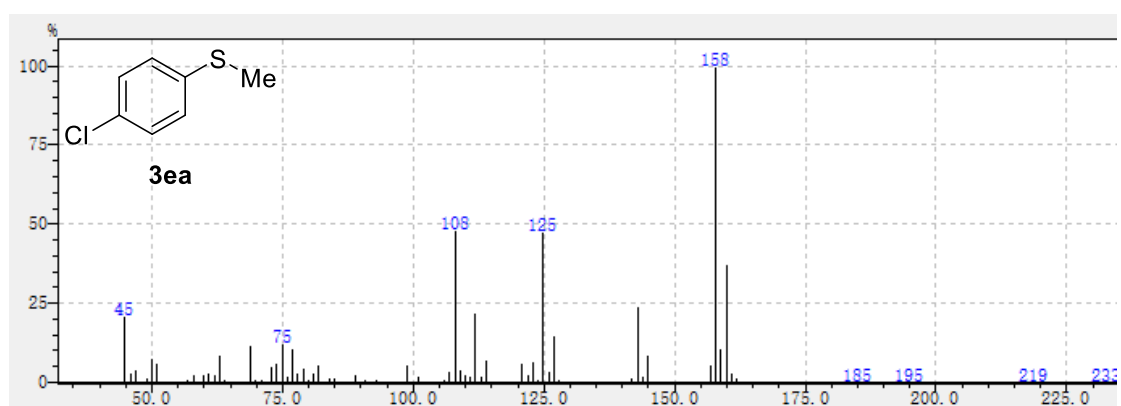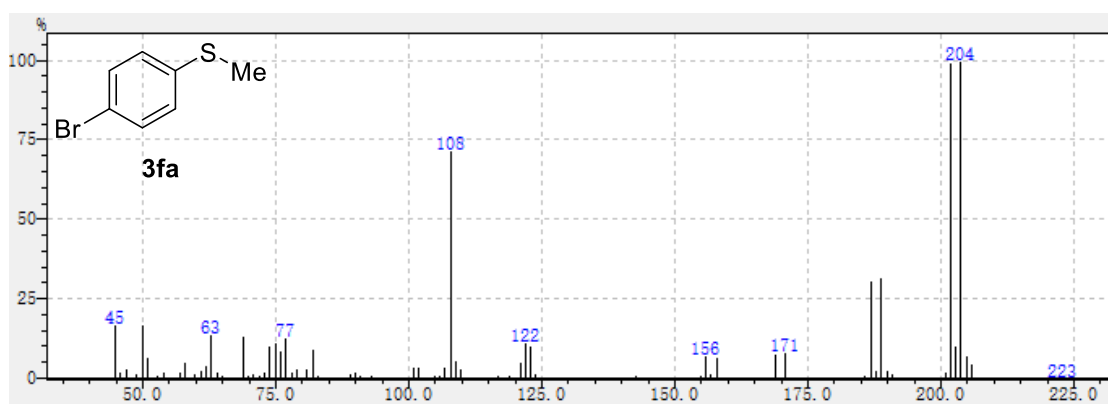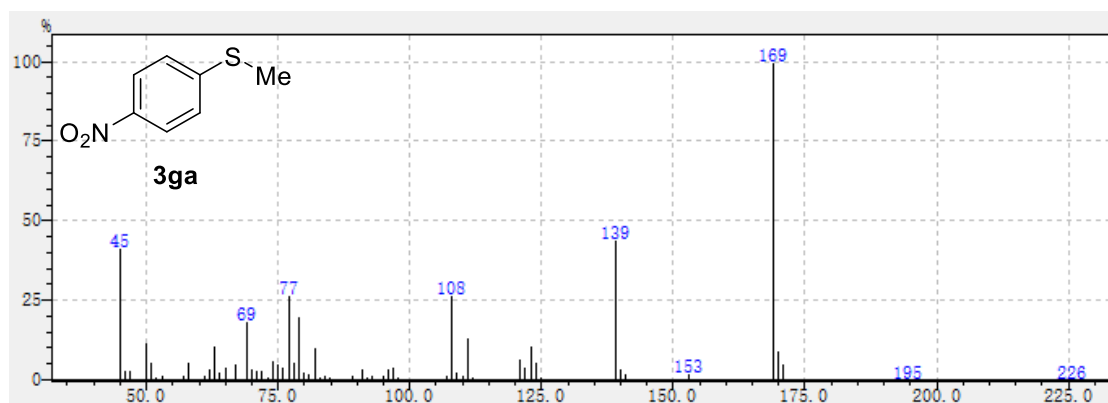

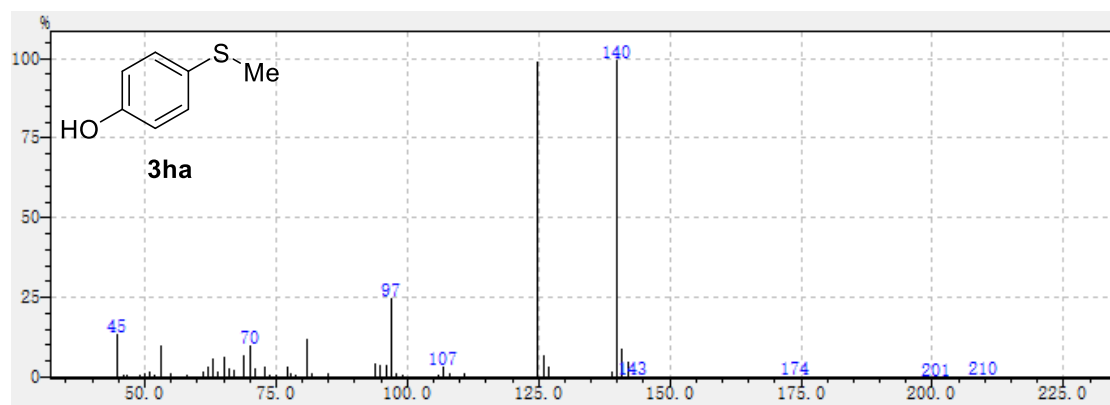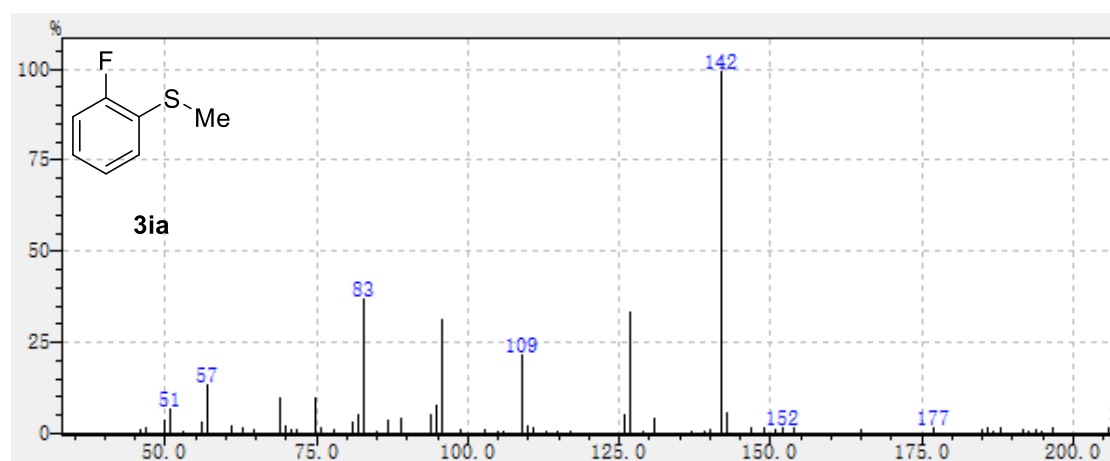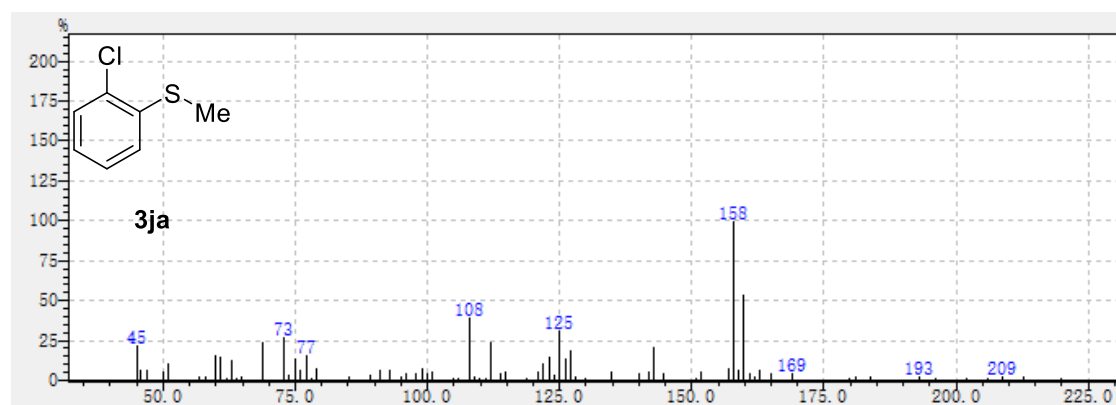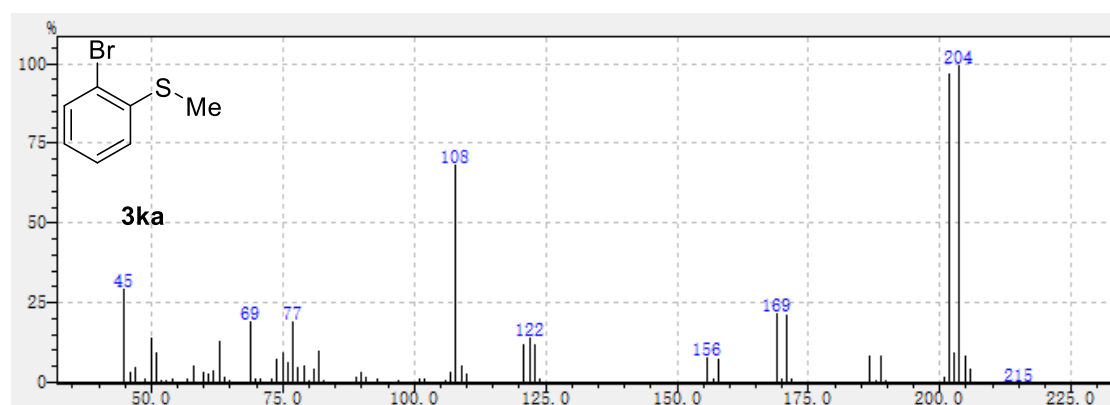

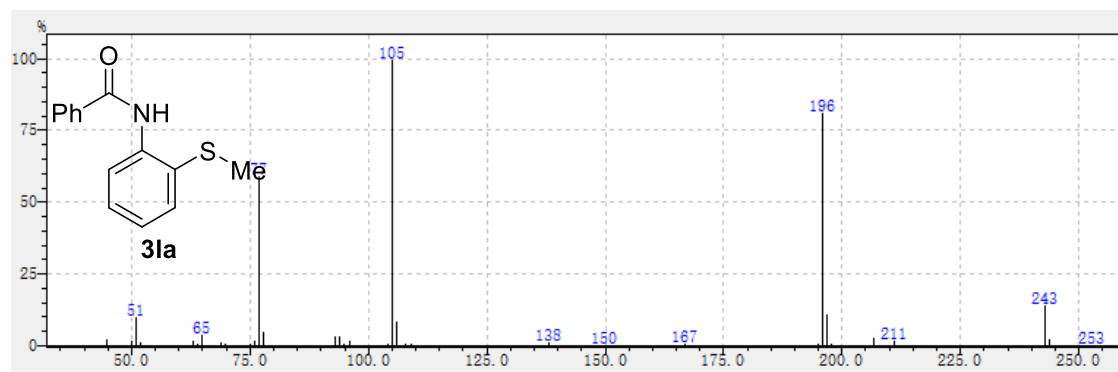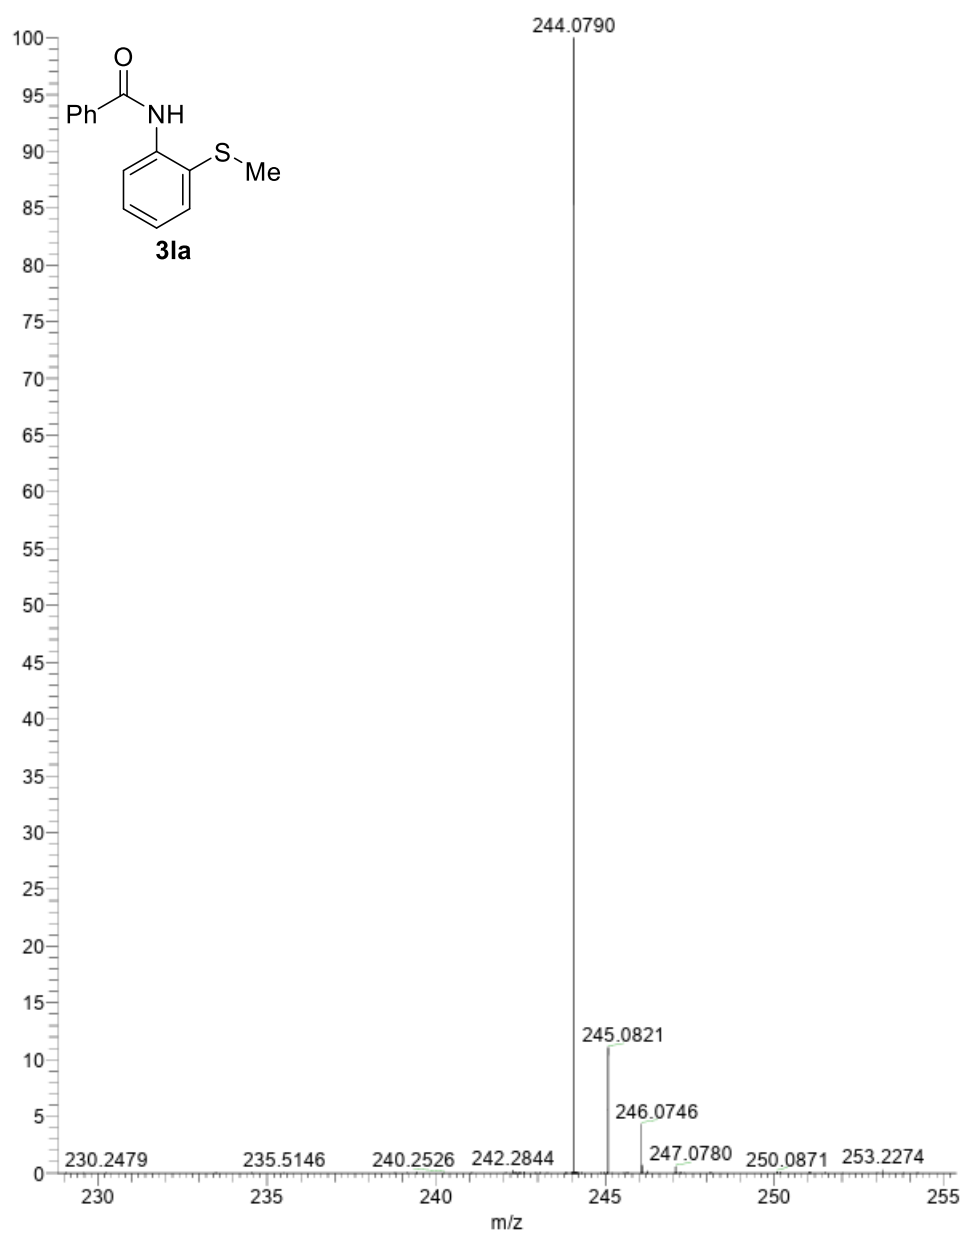

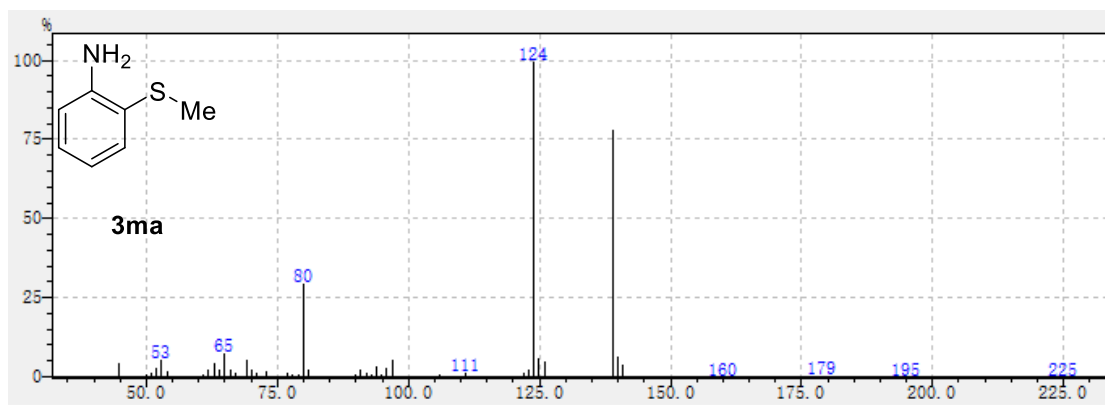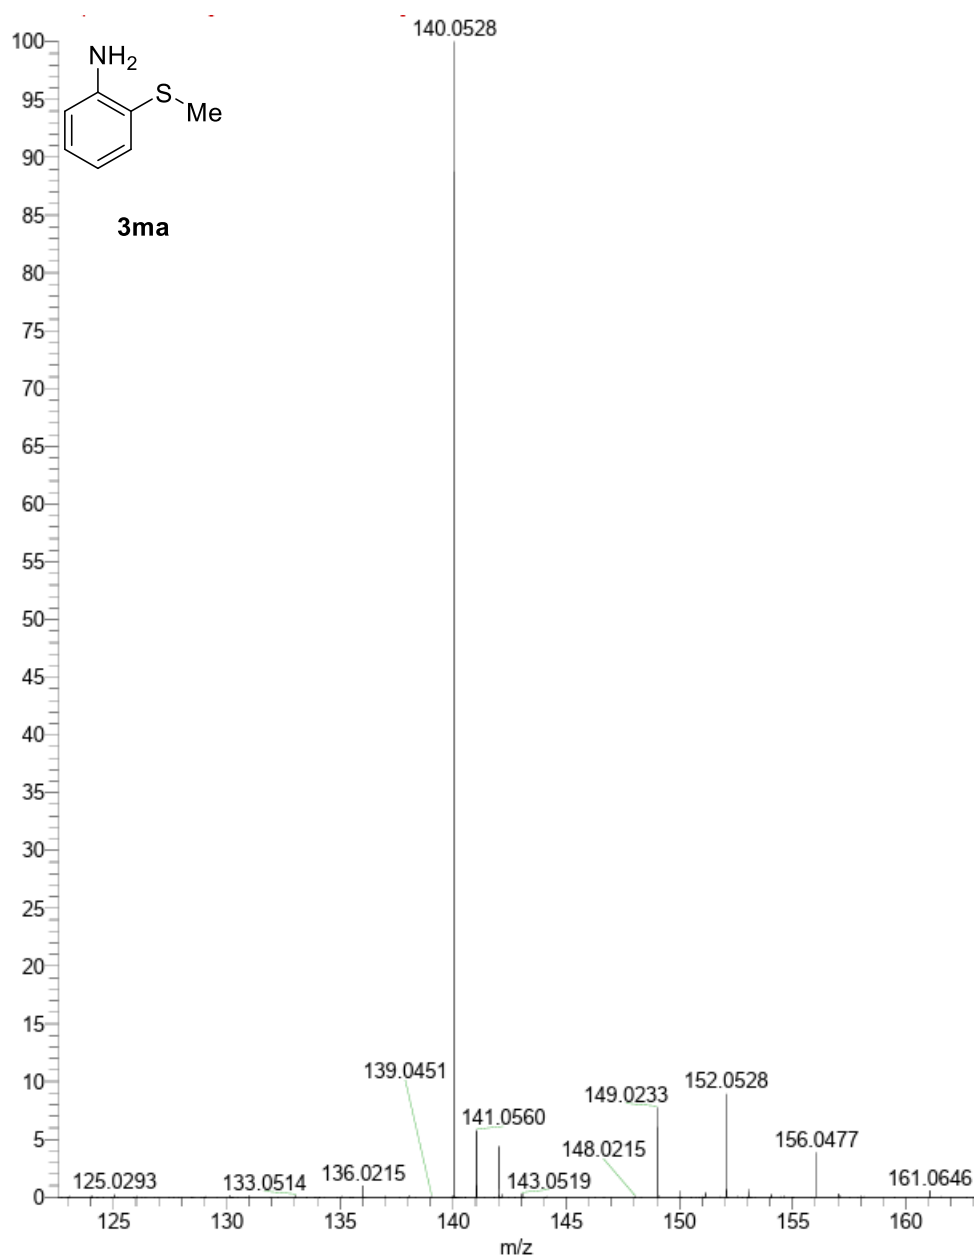

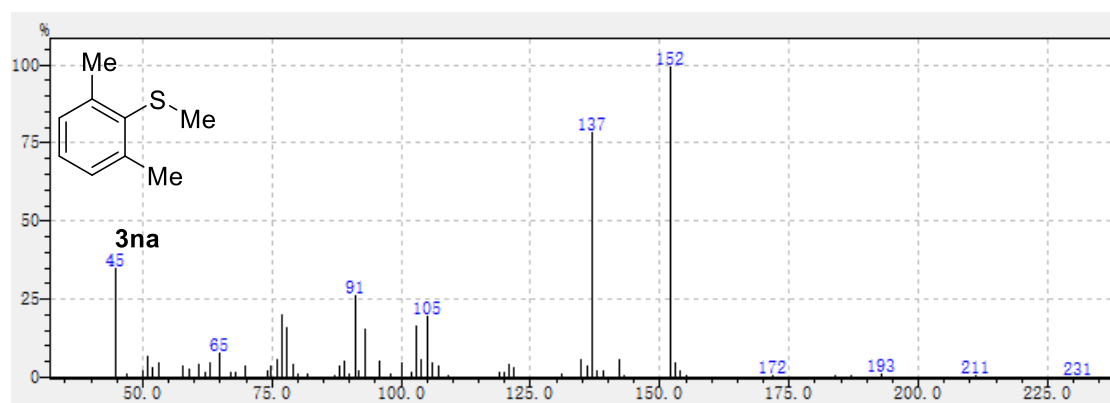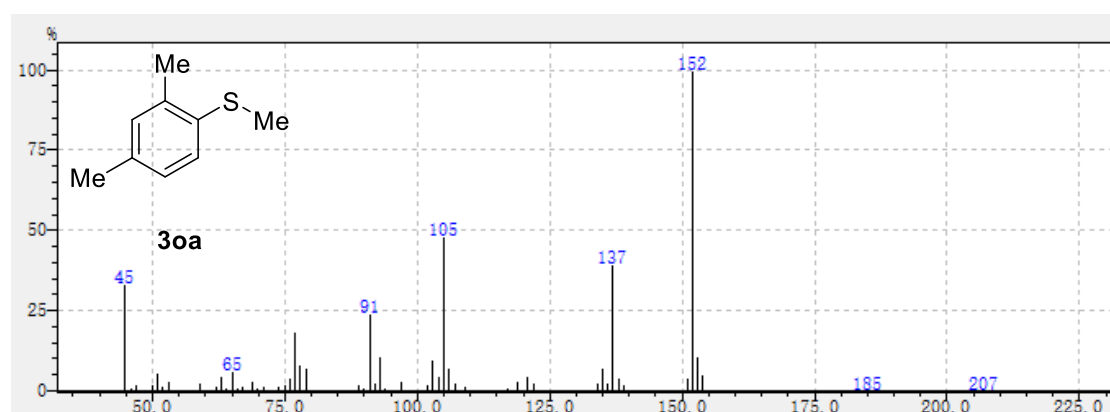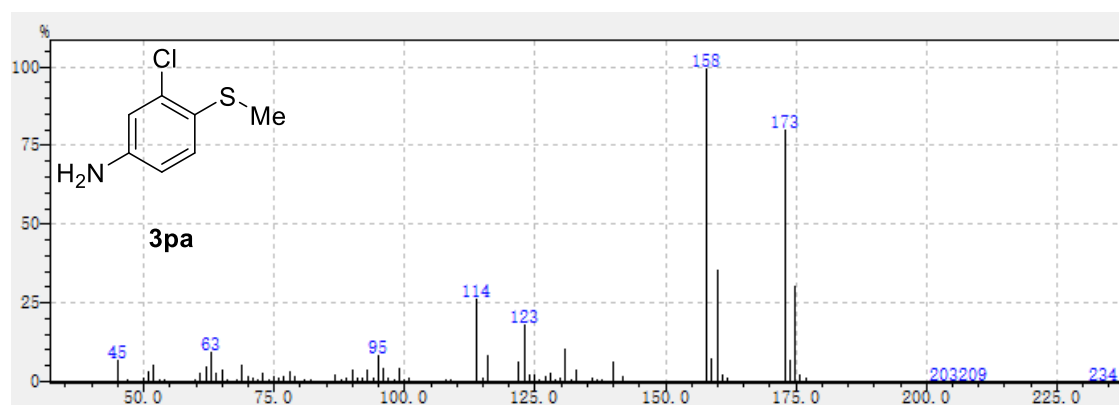

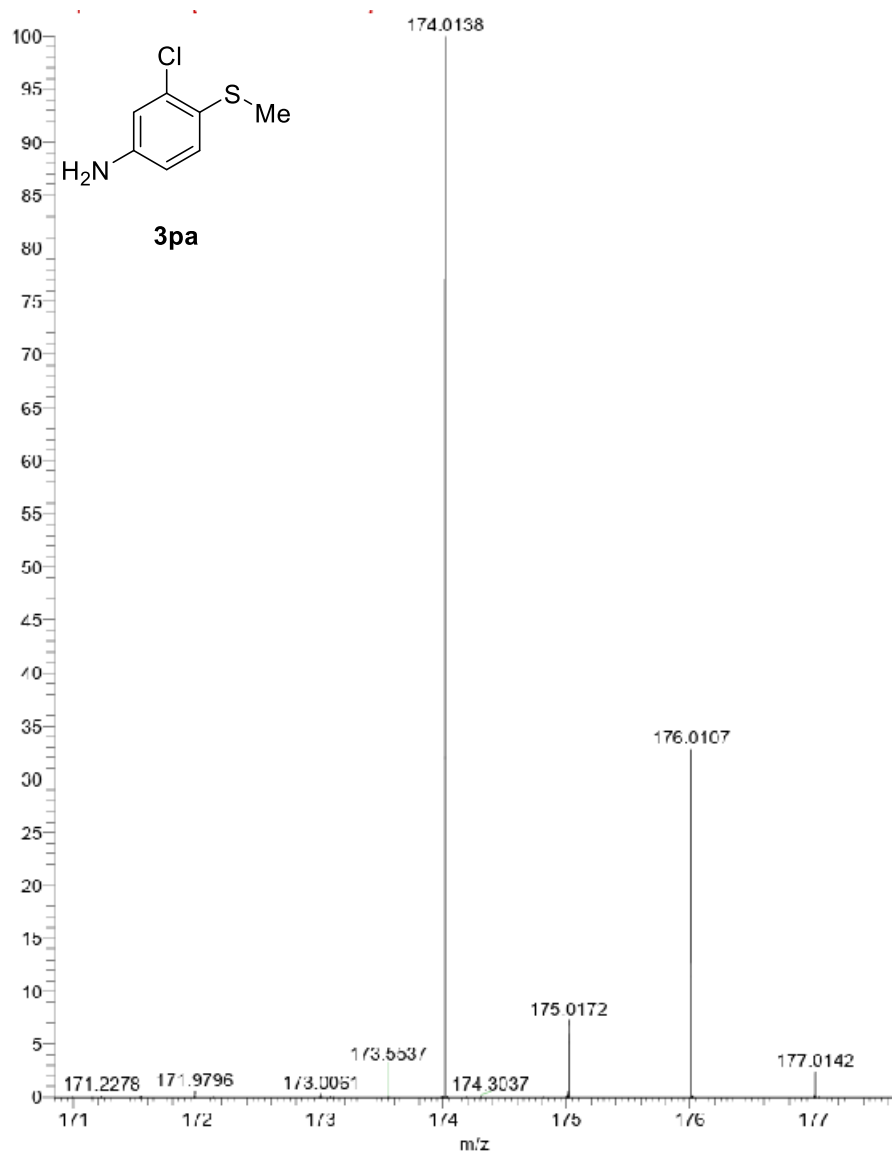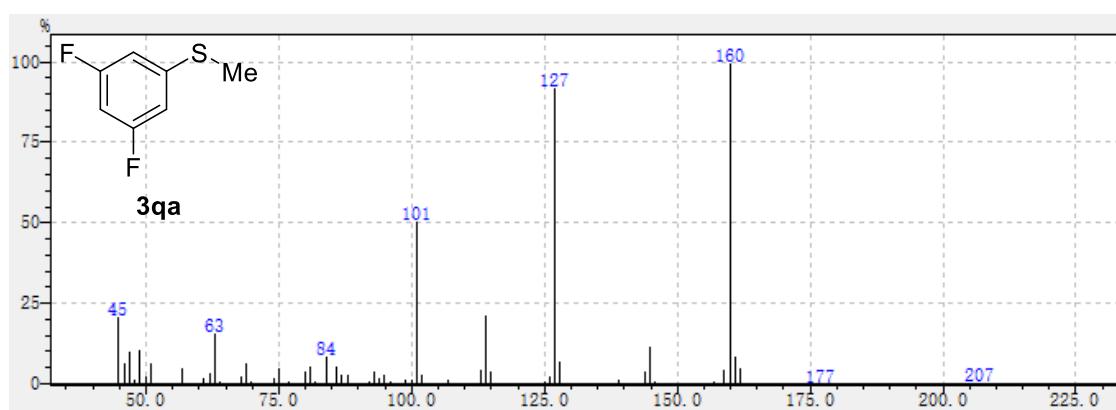

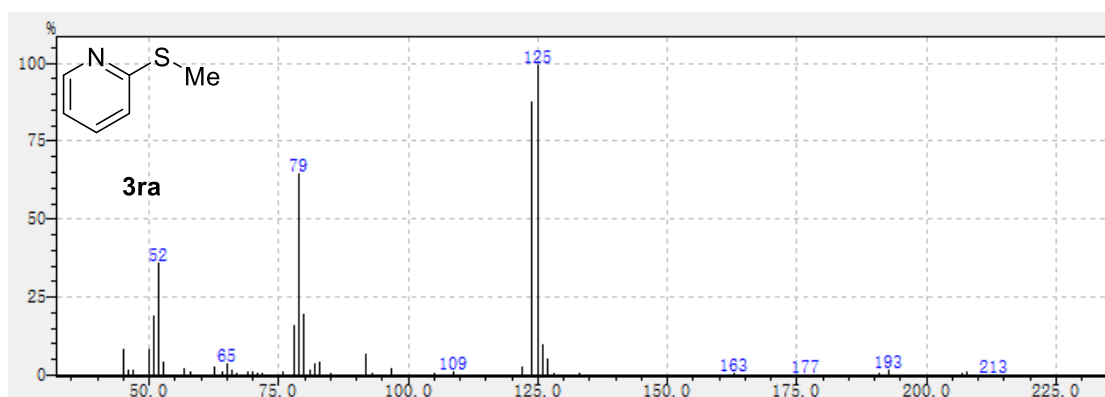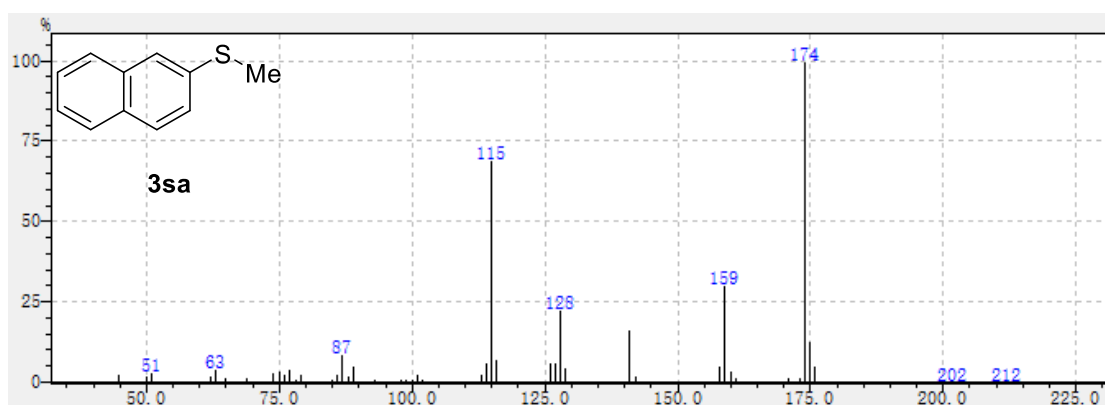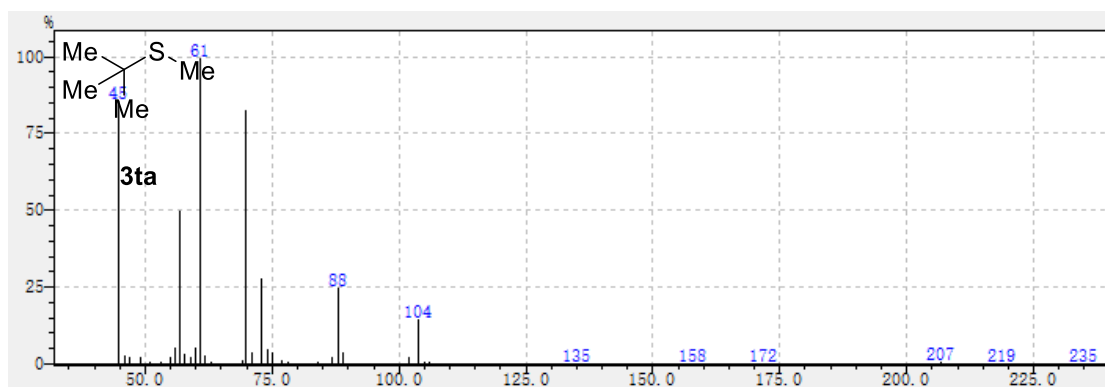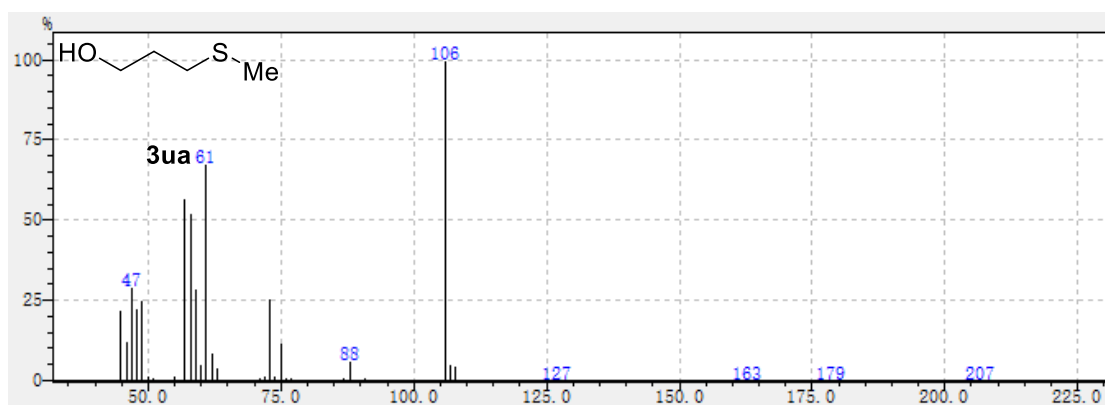

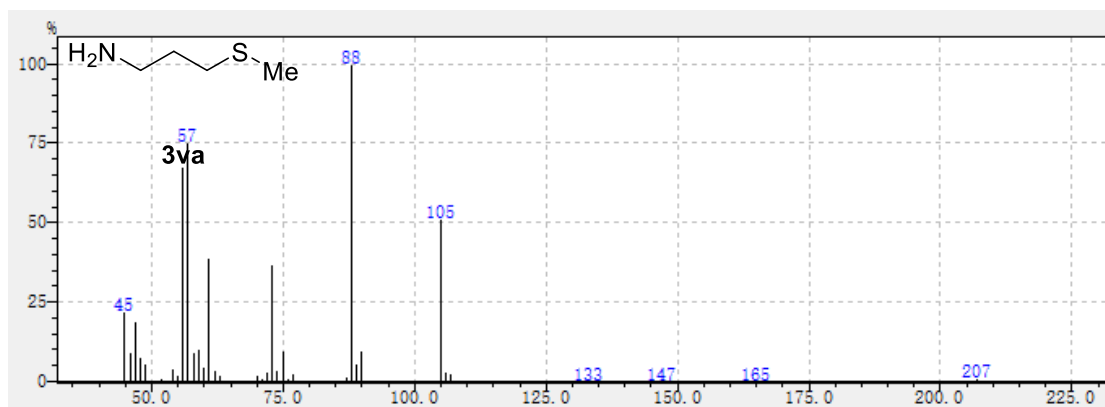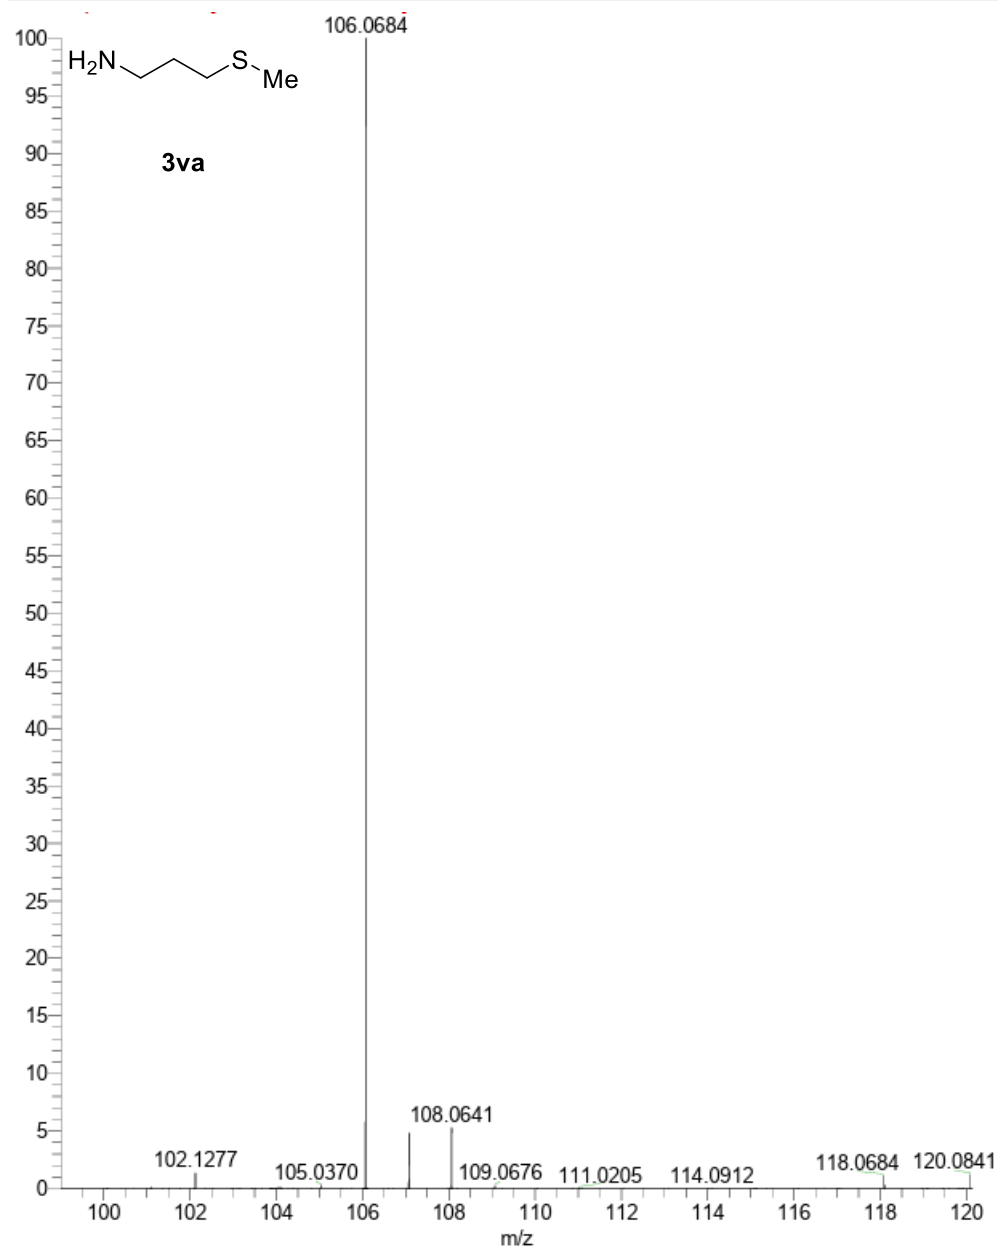

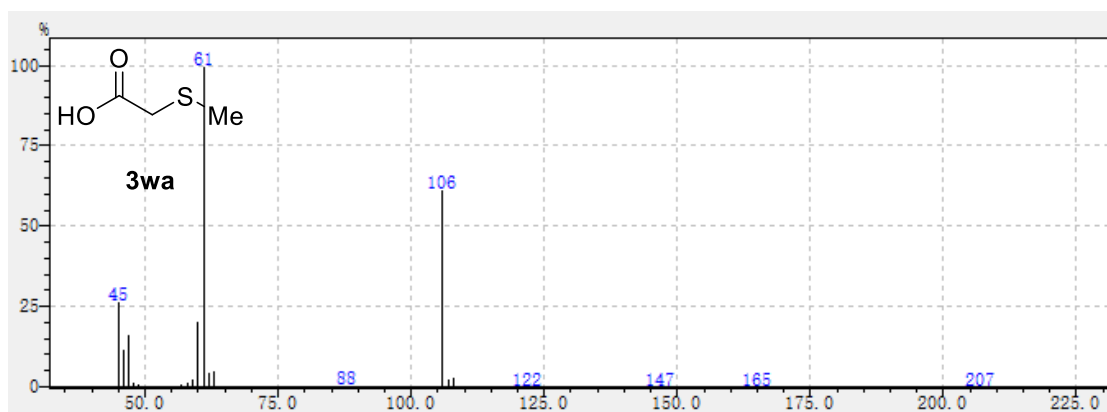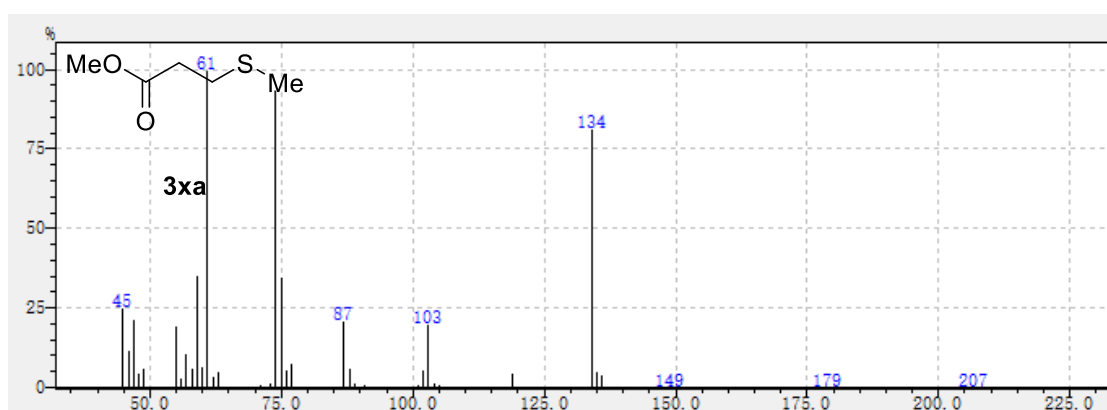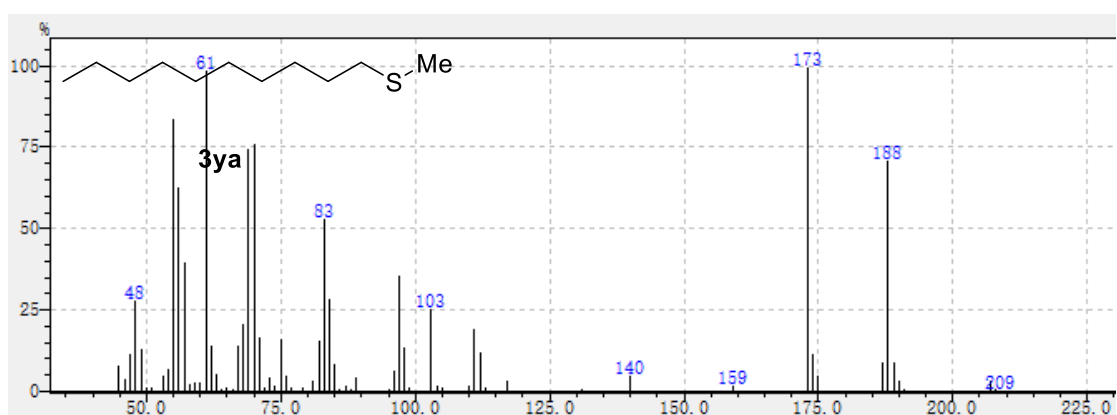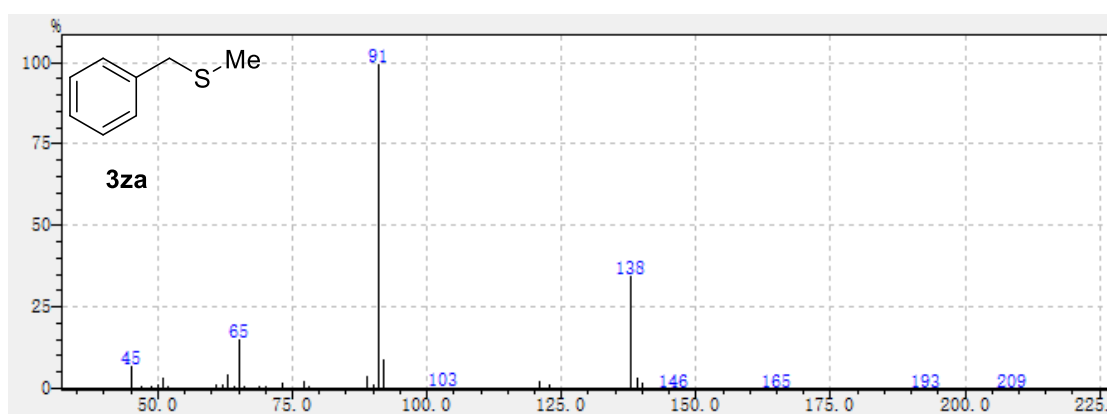

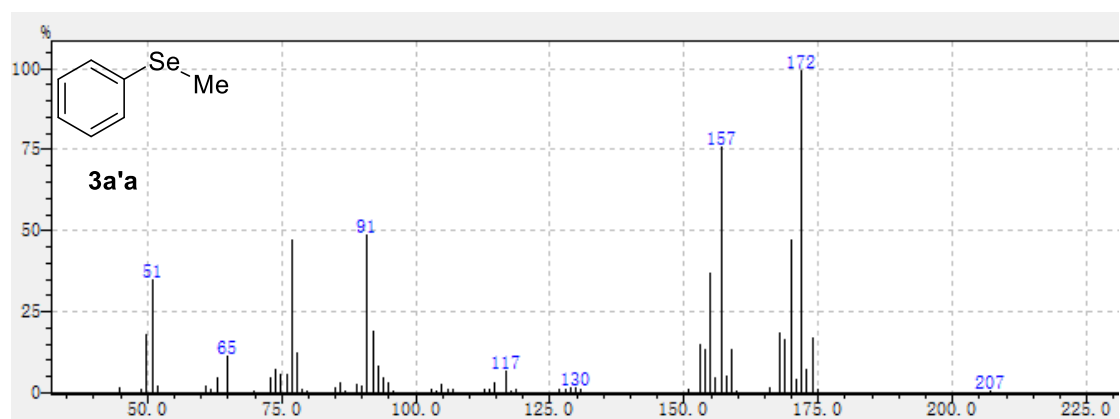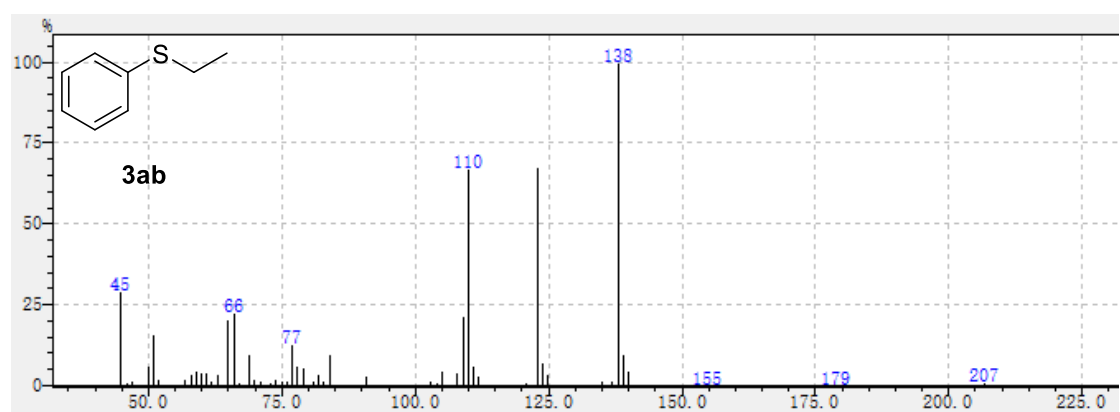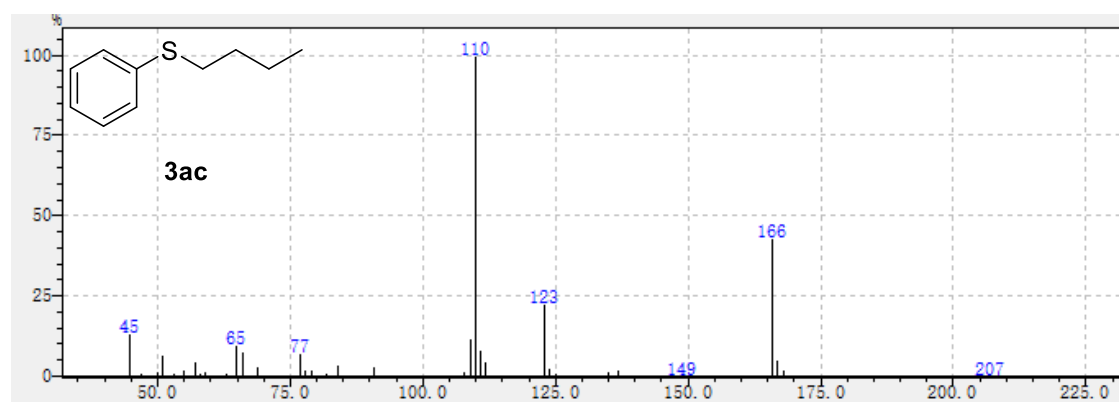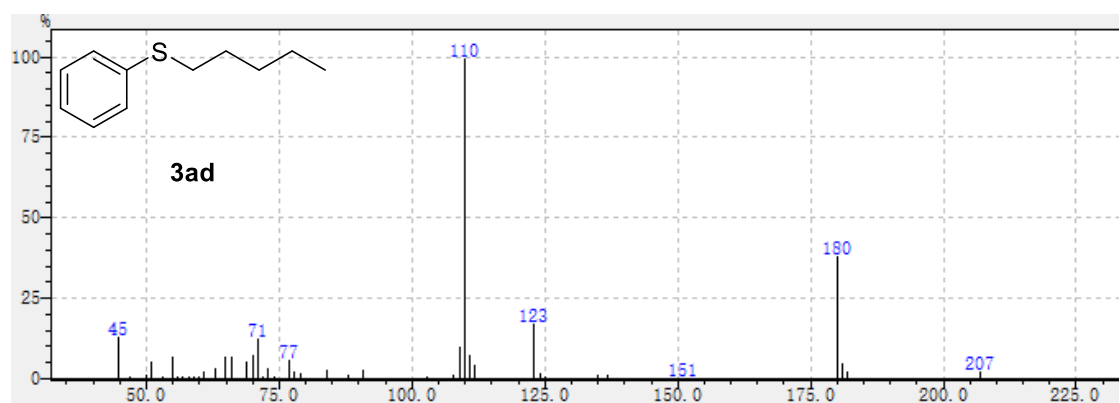

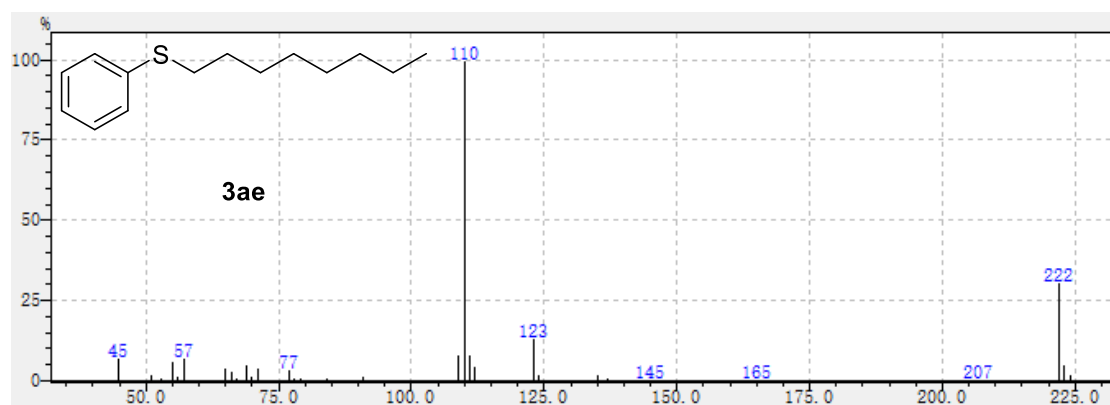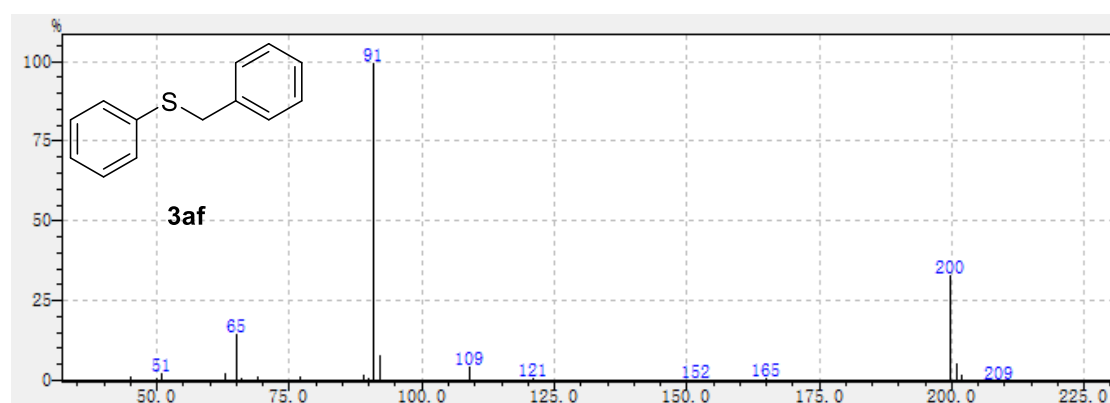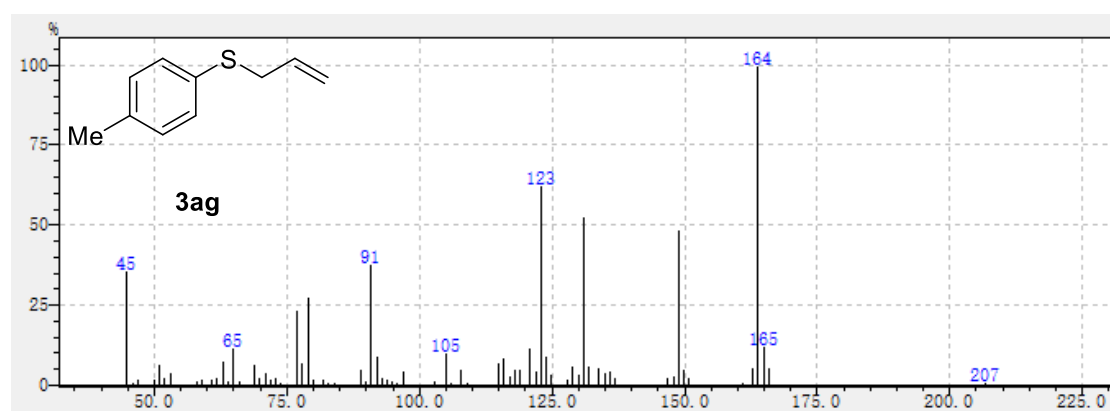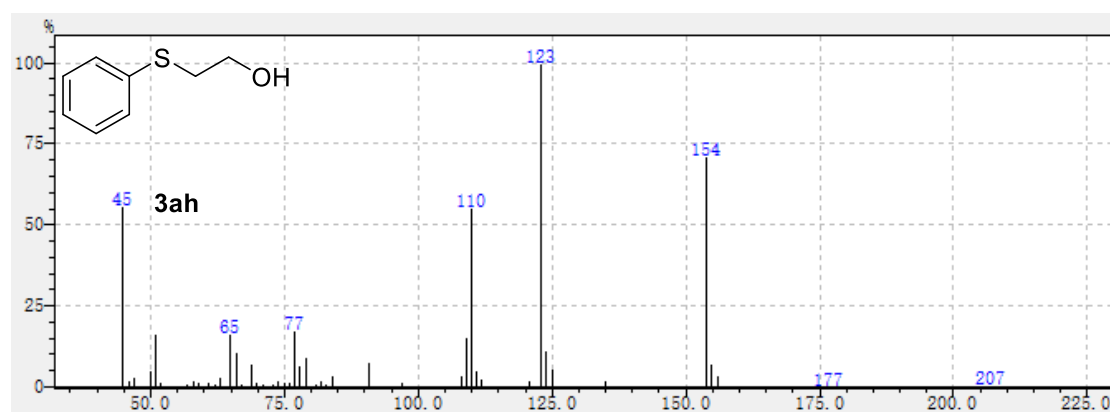

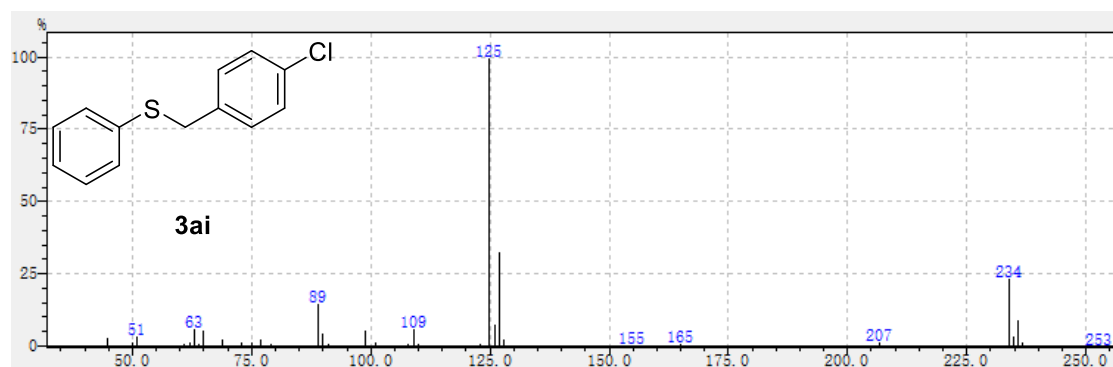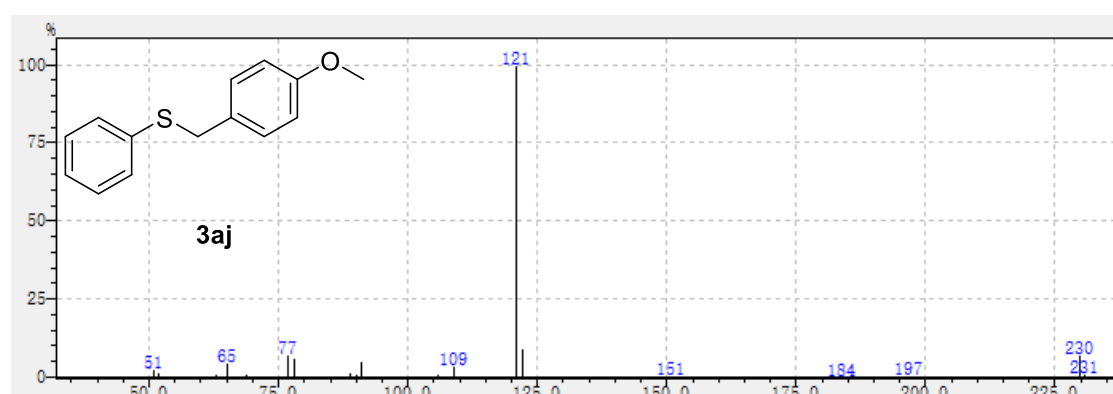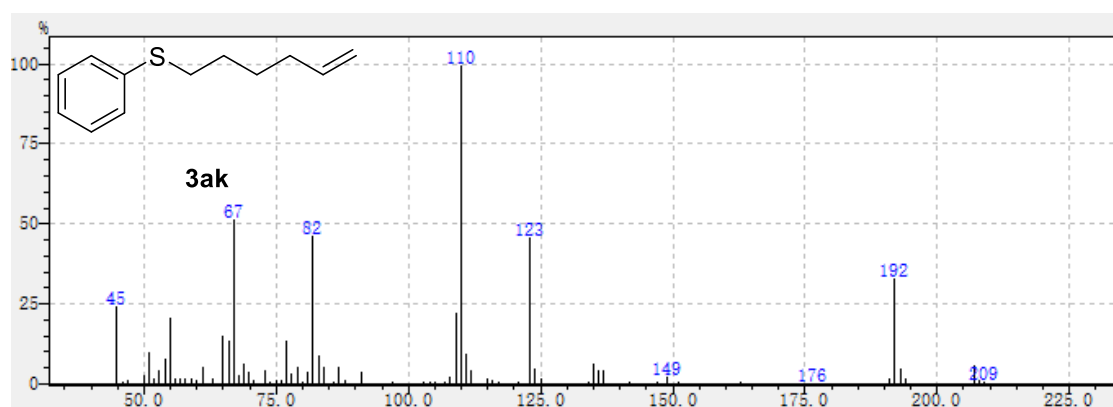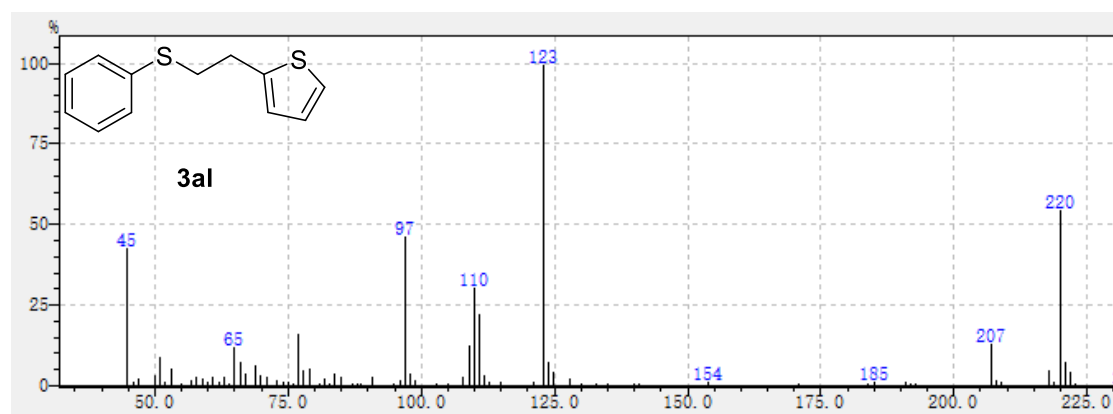

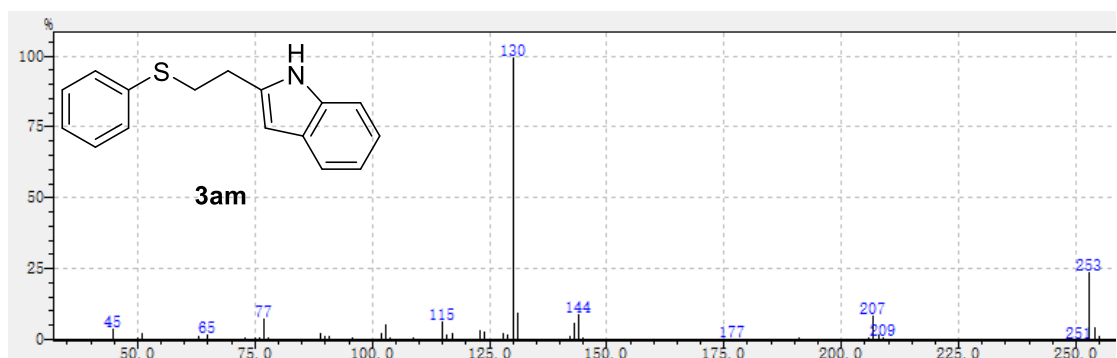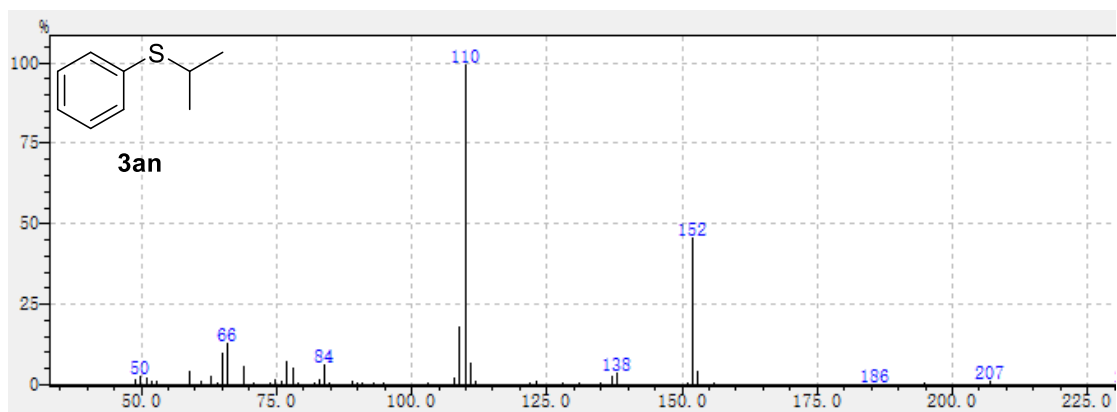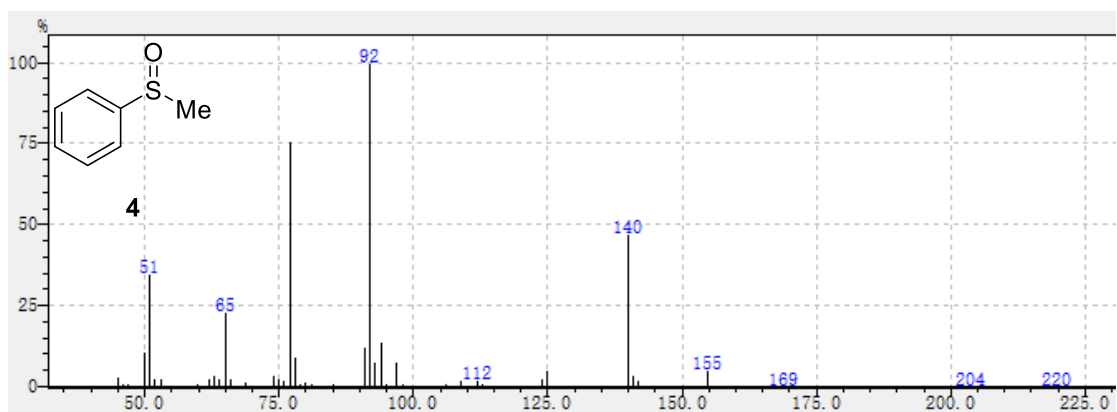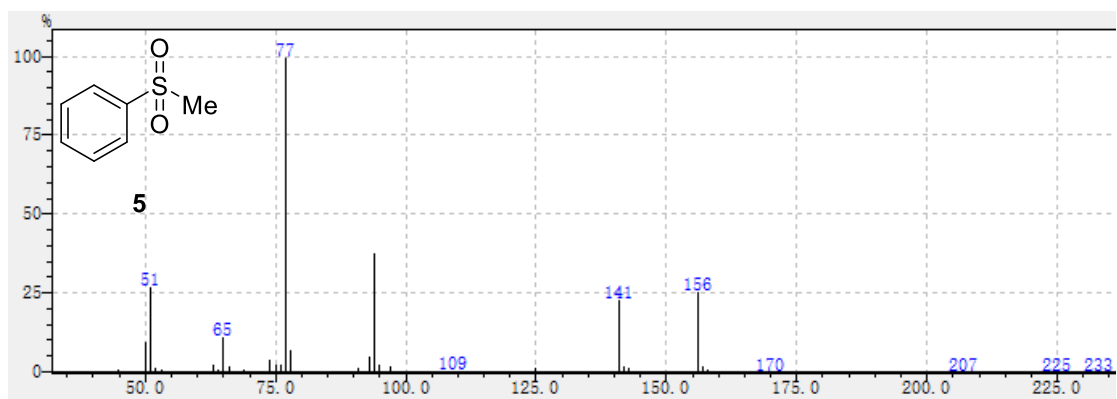

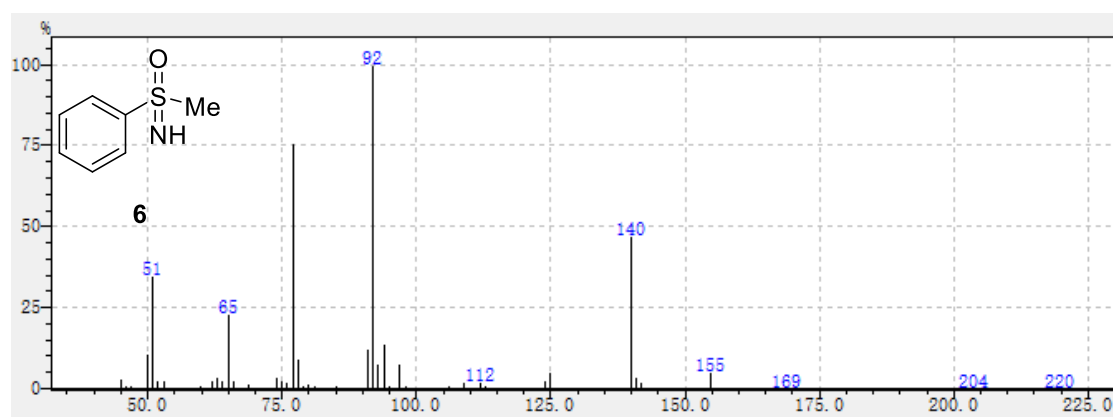

Supplement: d3cc04862d1.pdf [file d3cc04862d1.pdf]
